# Supplementary material
Source: PubMed Central journal article supplement (PMC4337996)

**Hand**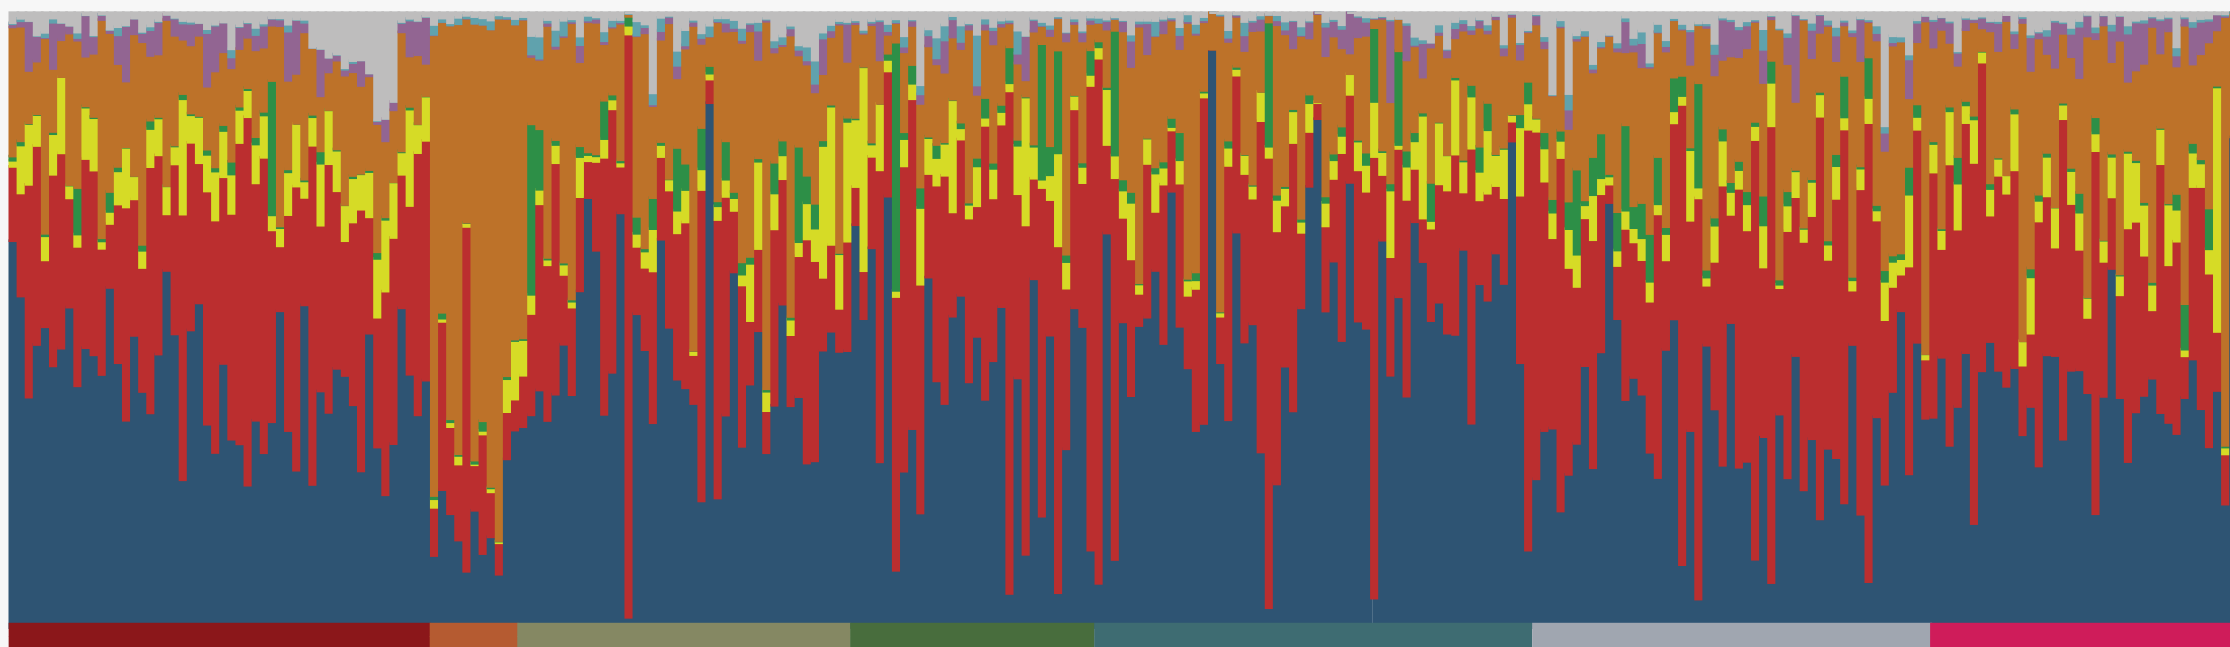**Bathroom Door Knob**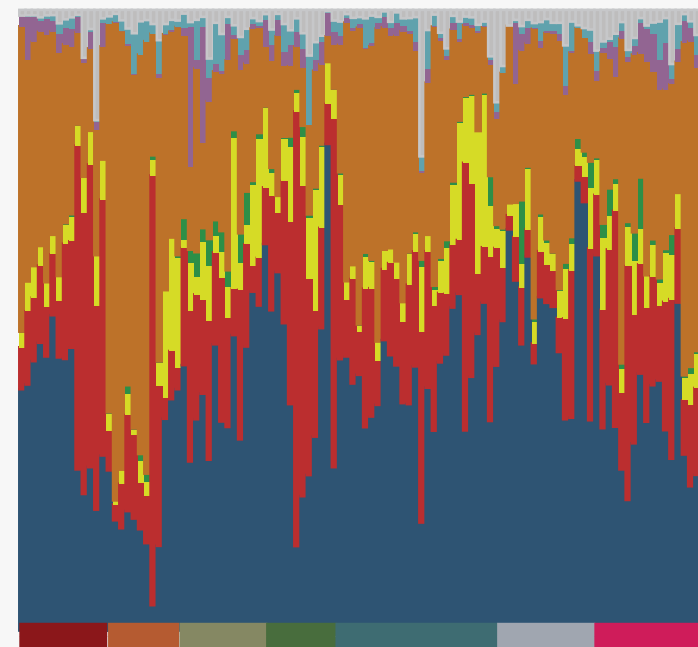**Bedroom Floor**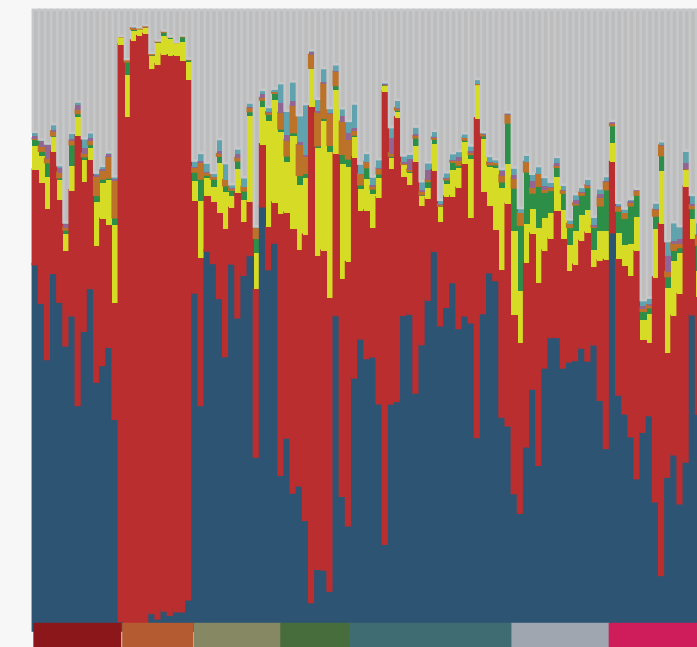**Front Door Knob**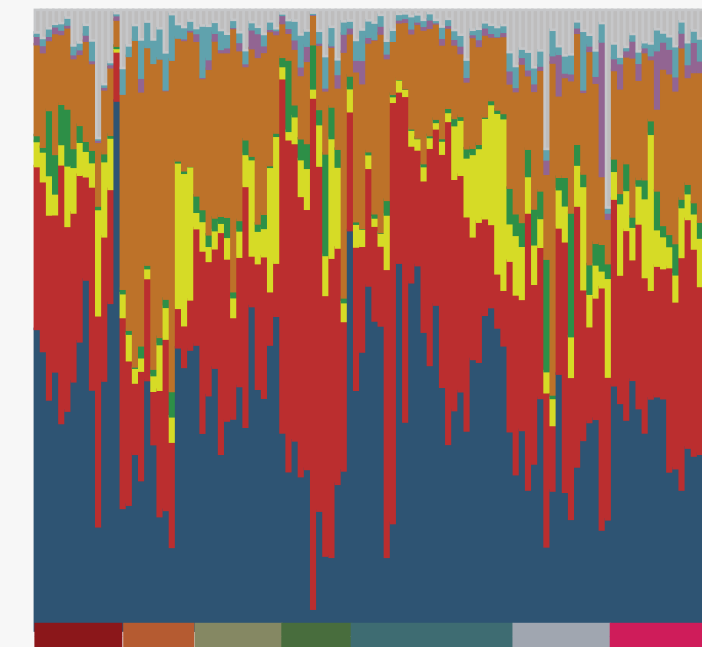

← 1 2 3 4 5 6 7 →  
Family Number

**Nose**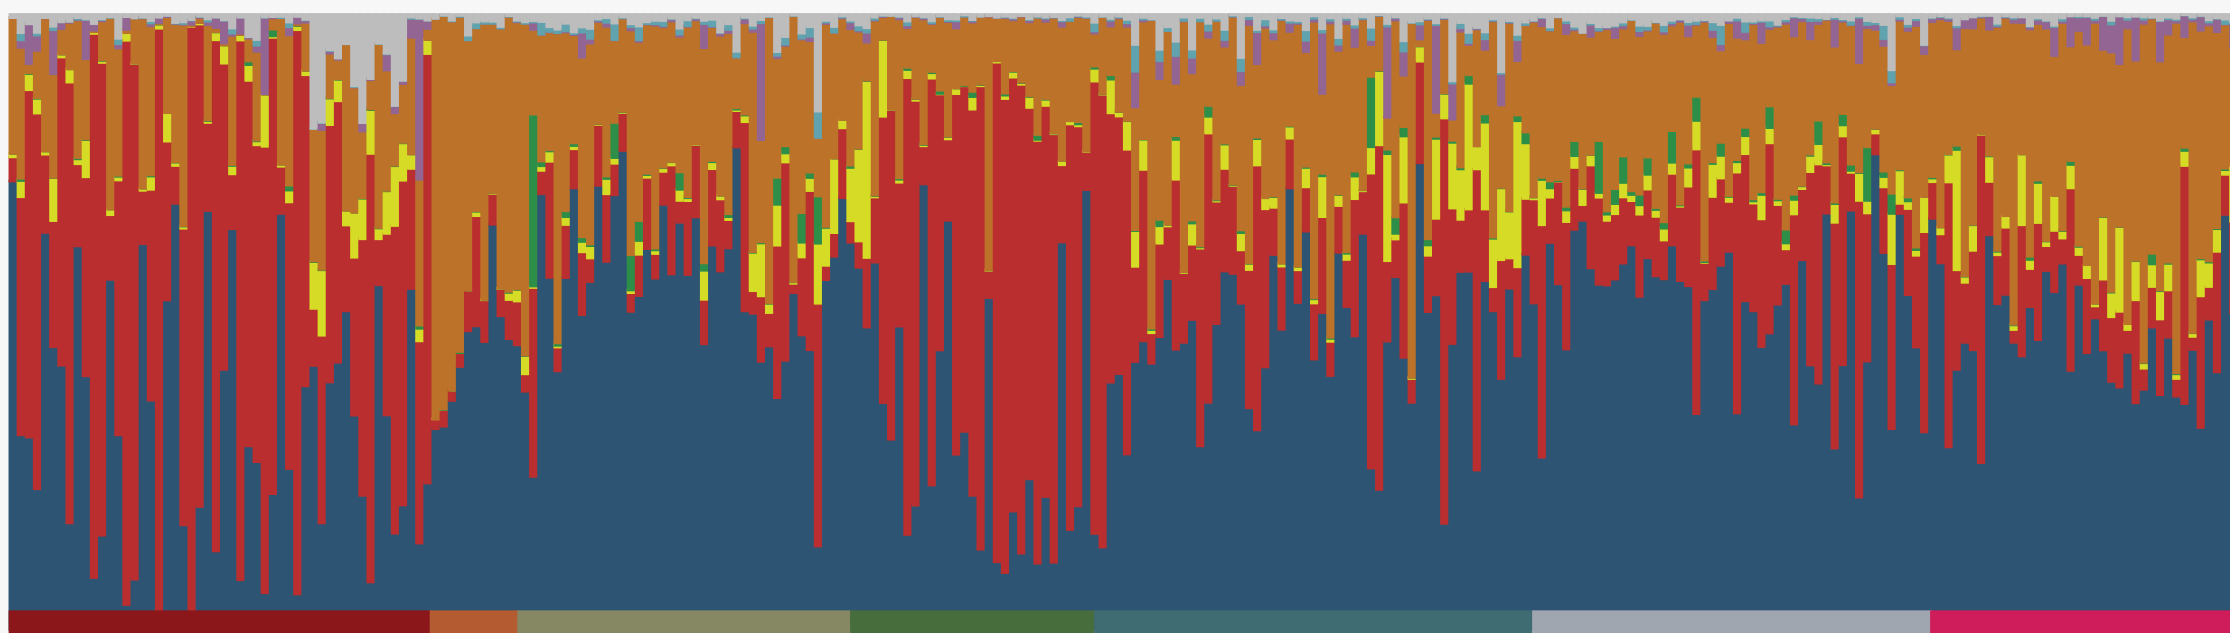**Kitchen Counter**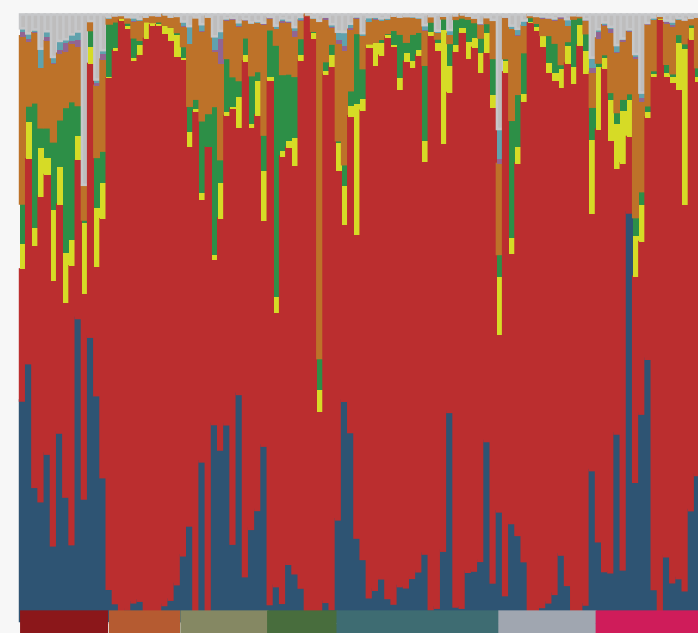**Kitchen Floor**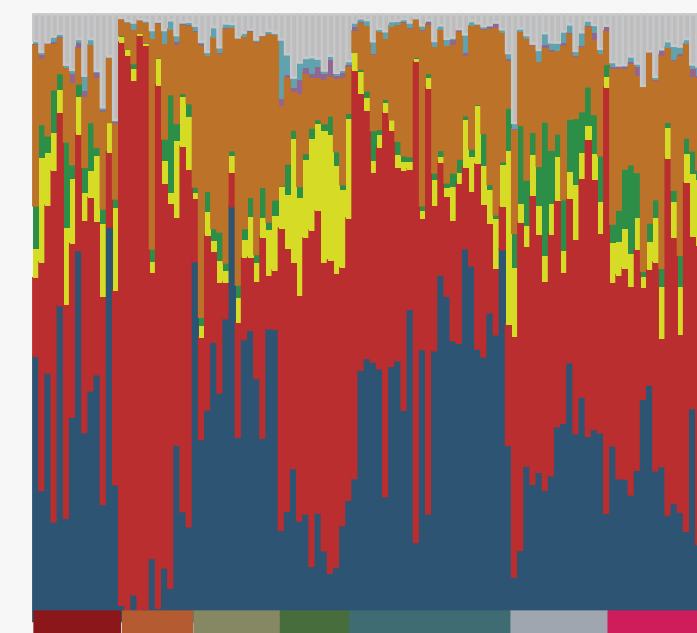**Kitchen Light Switch**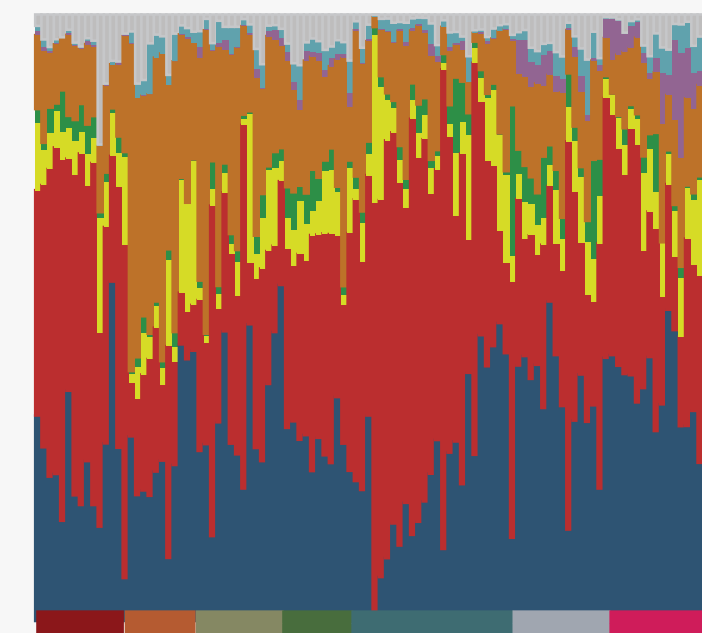**Foot**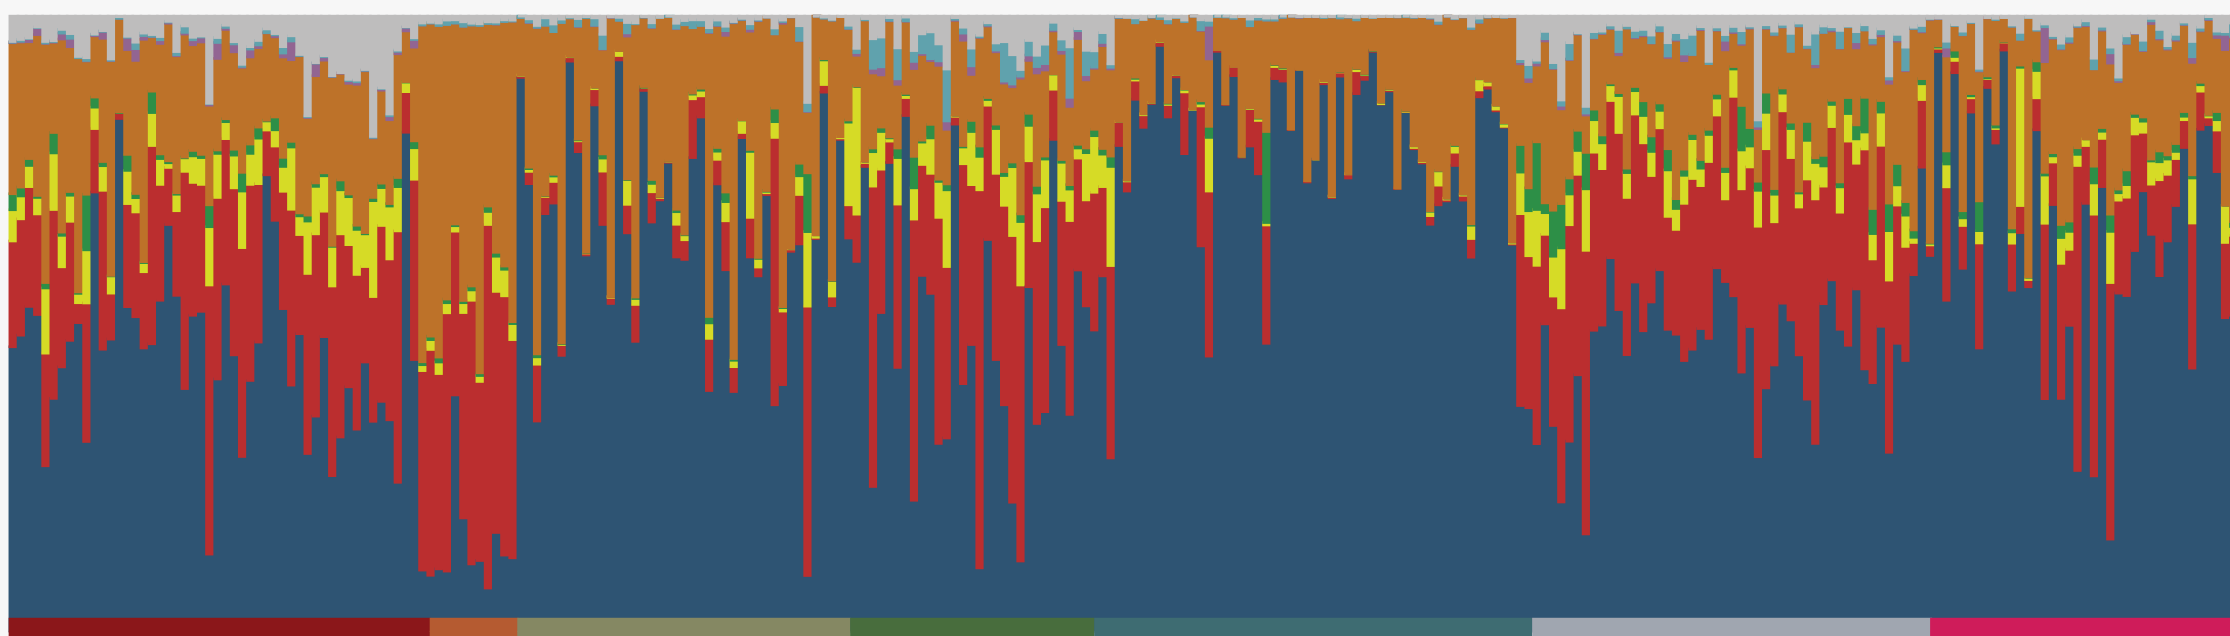**Dog Foot**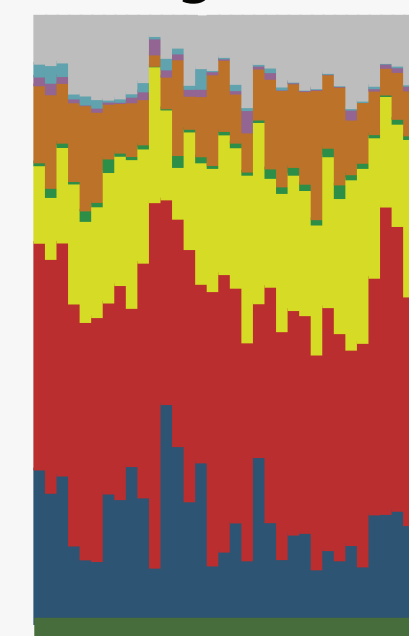**Dog Nose**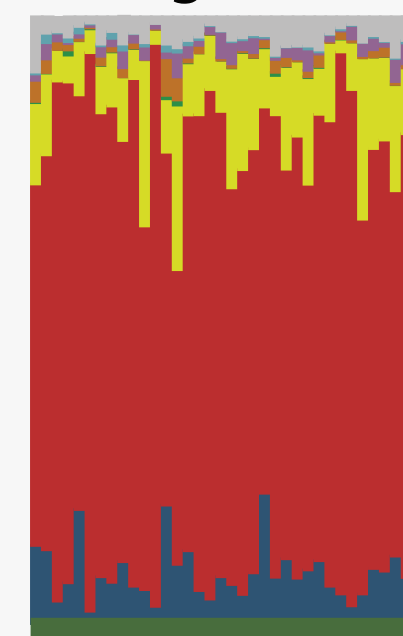**Cat Fur Cat Paw**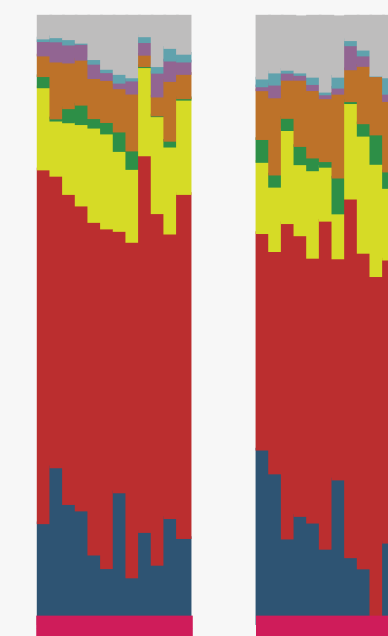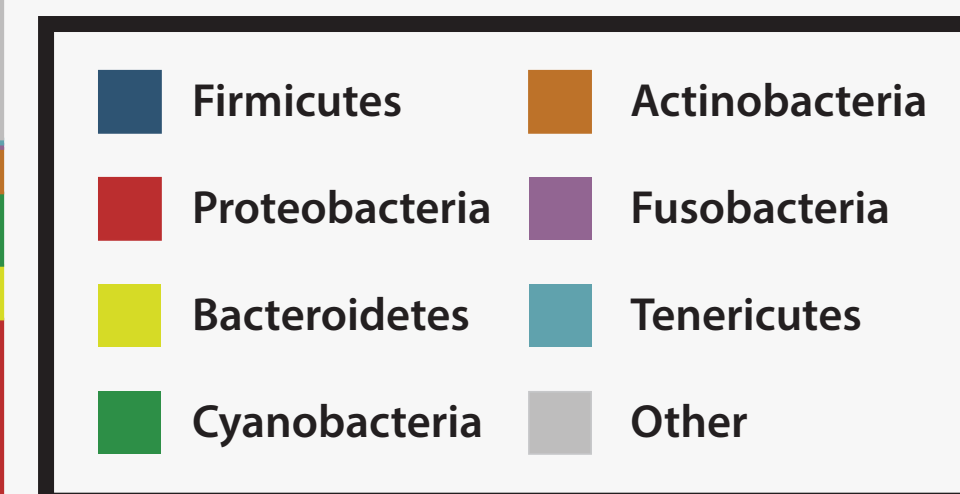

Supplement: NIHMS663075-supplement-Figure_S3.pdf [file NIHMS663075-supplement-Figure_S3.pdf]
