# Supplementary material
Source: PubMed Central journal article supplement (PMC4337996)
Supplement: NIHMS663075-supplement-Table_S1.pdf [file NIHMS663075-supplement-Table_S1.pdf]

|                             | Home 1     | Home 2     | Home 3     | Home 4     | Home 5A   | Home 5B    | Home 6A   | Home 6B    | Home 7A   | Home 7B    | Surface Total |            |
|-----------------------------|------------|------------|------------|------------|-----------|------------|-----------|------------|-----------|------------|---------------|------------|
| <b>Bathroom Door Knob</b>   | 14         | 12         | 13         | 11         | 1         | 25         | 2         | 14         | 6         | 13         | <b>111</b>    |            |
| <b>Bedroom Floor</b>        | 14         | 12         | 14         | 12         | 1         | 25         | 2         | 14         | 6         | 13         | <b>113</b>    |            |
| <b>Front Door Knob</b>      | 14         | 12         | 14         | 12         | 1         | 25         | 2         | 14         | 6         | 13         | <b>113</b>    |            |
| <b>Kitchen Counter</b>      | 14         | 12         | 14         | 11         | 1         | 25         | 2         | 14         | 6         | 13         | <b>112</b>    |            |
| <b>Kitchen Floor</b>        | 14         | 12         | 14         | 12         | 1         | 25         | 2         | 14         | 6         | 13         | <b>113</b>    |            |
| <b>Kitchen Light Switch</b> | 14         | 12         | 13         | 12         | 1         | 25         | 2         | 13         | 6         | 13         | <b>111</b>    |            |
| <b>Foot</b>                 | P1         | 10         | 12         | 14         | 8         | 1          | 24        | 2          | 14        | 6          | 13            | <b>272</b> |
|                             | P2         | 14         | NA         | 14         | 11        | 1          | 25        | 2          | 14        | 6          | 13            |            |
|                             | P3         | 13         | NA         | 14         | 12        | NA         | NA        | 2          | 14        | NA         | NA            |            |
|                             | P4         | 13         | NA         | NA         | NA        | NA         | NA        | NA         | NA        | NA         | NA            |            |
| <b>Hand</b>                 | P1         | 10         | 12         | 14         | 8         | 1          | 25        | 2          | 14        | 6          | 13            | <b>275</b> |
|                             | P2         | 14         | NA         | 14         | 12        | 1          | 25        | 2          | 14        | 6          | 13            |            |
|                             | P3         | 14         | NA         | 14         | 11        | NA         | NA        | 2          | 14        | NA         | NA            |            |
|                             | P4         | 14         | NA         | NA         | NA        | NA         | NA        | NA         | NA        | NA         | NA            |            |
| <b>Nose</b>                 | P1         | 10         | 12         | 14         | 7         | 1          | 25        | 2          | 14        | 6          | 13            | <b>274</b> |
|                             | P2         | 14         | NA         | 14         | 12        | 1          | 24        | 2          | 14        | 6          | 13            |            |
|                             | P3         | 14         | NA         | 14         | 12        | NA         | NA        | 2          | 14        | NA         | NA            |            |
|                             | P4         | 14         | NA         | NA         | NA        | NA         | NA        | NA         | NA        | NA         | NA            |            |
| <b>Pet</b>                  | NA         | NA         | NA         | 68         | NA        | NA         | NA        | NA         | NA        | 24         | <b>92</b>     |            |
| <b>Home Total</b>           | <b>238</b> | <b>108</b> | <b>208</b> | <b>231</b> | <b>12</b> | <b>298</b> | <b>30</b> | <b>209</b> | <b>72</b> | <b>180</b> |               |            |
