# Supplementary material
Source: PubMed Central journal article supplement (PMC4337996)
Supplement: NIHMS663075-supplement-Table_S2.pdf [file NIHMS663075-supplement-Table_S2.pdf]

| Sample Subset          | Predicted Category | Taxonomic Level | N   | Estimated Error $\pm$ SD | Baseline Error | Ratio        |
|------------------------|--------------------|-----------------|-----|--------------------------|----------------|--------------|
| All Home Samples       | Family             | OTU             | 673 | 0.0386 $\pm$ 0.0245      | 0.7682         | <b>19.91</b> |
| All Home Samples       | Surface            | OTU             | 673 | 0.2529 $\pm$ 0.0243      | 0.8321         | <b>3.29</b>  |
| Bathroom Door Knobs    | Family             | OTU             | 111 | 0.0471 $\pm$ 0.0738      | 0.7658         | <b>16.24</b> |
| Bedroom Floors         | Family             | OTU             | 113 | 0.0192 $\pm$ 0.0427      | 0.7699         | <b>40.17</b> |
| Front Door Knobs       | Family             | OTU             | 113 | 0.0562 $\pm$ 0.0666      | 0.7699         | <b>13.71</b> |
| Kitchen Counters       | Family             | OTU             | 112 | 0.0602 $\pm$ 0.0751      | 0.7679         | <b>12.76</b> |
| Kitchen Floors         | Family             | OTU             | 113 | 0.0144 $\pm$ 0.0304      | 0.7699         | <b>53.62</b> |
| Kitchen Light Switches | Family             | OTU             | 111 | 0.0593 $\pm$ 0.0834      | 0.7658         | <b>12.92</b> |
| Family 1 Home Samples  | Surface            | OTU             | 84  | 0.1083 $\pm$ 0.1364      | 0.8333         | <b>7.69</b>  |
| Family 2 Home Samples  | Surface            | OTU             | 72  | 0.0833 $\pm$ 0.1178      | 0.8333         | <b>10.00</b> |
| Family 3 Home Samples  | Surface            | OTU             | 82  | 0.2650 $\pm$ 0.1208      | 0.8293         | <b>3.13</b>  |
| Family 4 Home Samples  | Surface            | OTU             | 70  | 0.1367 $\pm$ 0.1543      | 0.8286         | <b>6.06</b>  |
| Family 5 Home Samples  | Surface            | OTU             | 156 | 0.1583 $\pm$ 0.0908      | 0.8333         | <b>5.26</b>  |
| Family 6 Home Samples  | Surface            | OTU             | 95  | 0.1083 $\pm$ 0.1115      | 0.8316         | <b>7.68</b>  |
| Family 7 Home Samples  | Surface            | OTU             | 114 | 0.2833 $\pm$ 0.1427      | 0.8333         | <b>2.94</b>  |
| All Home Samples       | Family             | Phylum          | 673 | 0.2795 $\pm$ 0.0414      | 0.7682         | <b>2.75</b>  |
| All Home Samples       | Family             | Class           | 673 | 0.2277 $\pm$ 0.0795      | 0.7682         | <b>3.37</b>  |
| All Home Samples       | Family             | Order           | 673 | 0.1389 $\pm$ 0.0475      | 0.7682         | <b>5.53</b>  |
| All Home Samples       | Family             | Family          | 673 | 0.1014 $\pm$ 0.0405      | 0.7682         | <b>7.58</b>  |
| All Home Samples       | Family             | Genus           | 673 | 0.0532 $\pm$ 0.0213      | 0.7682         | <b>14.43</b> |
| Family 5 Home Samples  | Pre/Post Move      | OTU             | 156 | 0.0760 $\pm$ 0.0220      | 0.0769         | <b>1.01</b>  |
| Family 6 Home Samples  | Pre/Post Move      | OTU             | 95  | 0.1241 $\pm$ 0.0306      | 0.1263         | <b>1.02</b>  |
| Family 7 Home Samples  | Pre/Post Move      | OTU             | 114 | 0.1923 $\pm$ 0.0962      | 0.3158         | <b>1.64</b>  |
