# Supplementary material
Source: PubMed Central journal article supplement (PMC4337996)
Supplement: NIHMS663075-supplement-Table_S3.pdf [file NIHMS663075-supplement-Table_S3.pdf]

**House 1**

|           |      | Source |      |      |     |    |     |    |    |     |
|-----------|------|--------|------|------|-----|----|-----|----|----|-----|
|           |      | Hand   | Foot | Nose | BDK | BF | FDK | KC | KF | KLS |
| Recipient | Hand | 16     | 21   | 25   | 3   | 5  | 3   | 10 | 2  | 3   |
|           | Foot | 26     | 24   | 22   | NA  | 9  | NA  | NA | 12 | NA  |
|           | Nose | 23     | 27   | 17   | 0   | 0  | 0   | 0  | 0  | 0   |
|           | BDK  | 14     | NA   | 0    | NA  | NA | NA  | NA | NA | NA  |
|           | BF   | 0      | 20   | 0    | NA  | NA | NA  | NA | NA | NA  |
|           | FDK  | 18     | NA   | 0    | NA  | NA | NA  | NA | NA | NA  |
|           | KC   | 21     | NA   | 0    | NA  | NA | NA  | NA | NA | NA  |
|           | KF   | 0      | 25   | 0    | NA  | NA | NA  | NA | NA | NA  |
|           | KLS  | 18     | NA   | 0    | NA  | NA | NA  | NA | NA | NA  |

**House 2**

|           |      | Source |      |      |     |    |     |    |    |     |
|-----------|------|--------|------|------|-----|----|-----|----|----|-----|
|           |      | Hand   | Foot | Nose | BDK | BF | FDK | KC | KF | KLS |
| Recipient | Hand | NA     | 1    | 2    | 1   | 2  | 3   | 1  | 1  | 0   |
|           | Foot | 4      | NA   | 4    | NA  | 2  | NA  | NA | 3  | NA  |
|           | Nose | 6      | 4    | NA   | 0   | 0  | 0   | 0  | 0  | 0   |
|           | BDK  | 4      | NA   | 0    | NA  | NA | NA  | NA | NA | NA  |
|           | BF   | 0      | 3    | 0    | NA  | NA | NA  | NA | NA | NA  |
|           | FDK  | 5      | NA   | 0    | NA  | NA | NA  | NA | NA | NA  |
|           | KC   | 0      | NA   | 6    | NA  | NA | NA  | NA | NA | NA  |
|           | KF   | 0      | 8    | 0    | NA  | NA | NA  | NA | NA | NA  |
|           | KLS  | 9      | NA   | 0    | NA  | NA | NA  | NA | NA | NA  |

**House 3**

|           |      | Source |      |      |     |    |     |    |    |     |
|-----------|------|--------|------|------|-----|----|-----|----|----|-----|
|           |      | Hand   | Foot | Nose | BDK | BF | FDK | KC | KF | KLS |
| Recipient | Hand | 13     | 14   | 21   | 6   | 5  | 8   | 4  | 7  | 4   |
|           | Foot | 20     | 21   | 19   | NA  | 7  | NA  | NA | 8  | NA  |
|           | Nose | 29     | 26   | 20   | 0   | 0  | 0   | 0  | 0  | 0   |
|           | BDK  | 18     | NA   | 0    | NA  | NA | NA  | NA | NA | NA  |
|           | BF   | 0      | 16   | 0    | NA  | NA | NA  | NA | NA | NA  |
|           | FDK  | 22     | NA   | 0    | NA  | NA | NA  | NA | NA | NA  |
|           | KC   | 17     | NA   | 0    | NA  | NA | NA  | NA | NA | NA  |
|           | KF   | 13     | 0    | 0    | NA  | NA | NA  | NA | NA | NA  |
|           | KLS  | 20     | NA   | 0    | NA  | NA | NA  | NA | NA | NA  |

**House 4**

|           |          | Source |      |      |     |    |     |    |    |     |          |          |
|-----------|----------|--------|------|------|-----|----|-----|----|----|-----|----------|----------|
|           |          | Hand   | Foot | Nose | BDK | BF | FDK | KC | KF | KLS | Dog Nose | Dog Foot |
| Recipient | Hand     | 9      | 13   | 13   | 4   | 5  | 5   | 4  | 5  | 4   | 13       | 10       |
|           | Foot     | 20     | 8    | 12   | NA  | 5  | NA  | NA | 11 | NA  | 14       | 18       |
|           | Nose     | 15     | 20   | 10   | 0   | 0  | 0   | 0  | 0  | 0   | 12       | 15       |
|           | BDK      | 20     | NA   | 0    | NA  | NA | NA  | NA | NA | NA  | 0        | NA       |
|           | BF       | 0      | 10   | 0    | NA  | NA | NA  | NA | NA | NA  | 9        | 9        |
|           | FDK      | 21     | NA   | 0    | NA  | NA | NA  | NA | NA | NA  | 0        | NA       |
|           | KC       | 15     | NA   | 0    | NA  | NA | NA  | NA | NA | NA  | 0        | NA       |
|           | KF       | 27     | 12   | 3    | NA  | NA | NA  | NA | NA | NA  | 6        | 7        |
|           | KLS      | 0      | NA   | 0    | NA  | NA | NA  | NA | NA | NA  | 0        | NA       |
|           | Dog Nose |        | 7    | 14   | 20  | NA | 5   | NA | NA | 5   | NA       | 11       |
| Dog Foot  |          | 24     | 8    | 14   | NA  | 0  | NA  | NA | 6  | NA  | 10       | 13       |

## House 1

| Source | Recipient            | Taxonomy   |
|--------|----------------------|------------|
| Hand 1 | Kitchen Light Switch | Acidobact  |
| Hand 1 | Kitchen Light Switch | Actinobact |
| Hand 1 | Kitchen Light Switch | Firmicutes |
| Hand 1 | Kitchen Light Switch | Thermi     |
| Hand 2 | Kitchen Light Switch | Acidobact  |
| Hand 2 | Kitchen Light Switch | Cyanobact  |
| Hand 2 | Kitchen Light Switch | Gemmatimon |
| Hand 2 | Kitchen Light Switch | Plancto    |
| Hand 2 | Kitchen Light Switch | WPS2       |
| Hand 3 | Kitchen Light Switch | Actinobact |
| Hand 3 | Kitchen Light Switch | Cyanobact  |
| Hand 3 | Kitchen Light Switch | Gemmatimon |
| Hand 3 | Kitchen Light Switch | Plancto    |
| Hand 3 | Kitchen Light Switch | Proteobact |
| Hand 4 | Kitchen Light Switch | Crenarch   |
| Hand 4 | Kitchen Light Switch | Proteobact |
| Hand 4 | Kitchen Light Switch | Thermi     |
| Hand 4 | Kitchen Light Switch | WPS2       |
| Foot 1 | Kitchen Floor        | Acidobact  |
| Foot 1 | Kitchen Floor        | AD3        |
| Foot 1 | Kitchen Floor        | Bacteroid  |
| Foot 1 | Kitchen Floor        | Cyanobact  |
| Foot 1 | Kitchen Floor        | Firmicutes |
| Foot 1 | Kitchen Floor        | Plancto    |
| Foot 1 | Kitchen Floor        | Proteobact |
| Foot 1 | Kitchen Floor        | Verruco    |
| Foot 2 | Kitchen Floor        | Actinobact |
| Foot 2 | Kitchen Floor        | Crenarch   |
| Foot 2 | Kitchen Floor        | Firmicutes |
| Foot 2 | Kitchen Floor        | Gemmatimon |
| Foot 2 | Kitchen Floor        | Plancto    |
| Foot 2 | Kitchen Floor        | Thermi     |
| Foot 2 | Kitchen Floor        | WPS2       |
| Foot 3 | Kitchen Floor        | Actinobact |
| Foot 3 | Kitchen Floor        | AD3        |
| Foot 3 | Kitchen Floor        | Crenarch   |
| Foot 3 | Kitchen Floor        | Thermi     |
| Foot 3 | Kitchen Floor        | Verruco    |
| Foot 3 | Kitchen Floor        | WPS2       |
| Foot 4 | Kitchen Floor        | Acidobact  |

|        |                 |            |
|--------|-----------------|------------|
| Foot 4 | Kitchen Floor   | Cyanobact  |
| Foot 4 | Kitchen Floor   | Gemmatimon |
| Foot 4 | Kitchen Floor   | Proteobact |
| Hand 1 | Kitchen Counter | Acidobact  |
| Hand 1 | Kitchen Counter | Actinobact |
| Hand 1 | Kitchen Counter | Bacteroid  |
| Hand 1 | Kitchen Counter | Cyanobact  |
| Hand 1 | Kitchen Counter | Plancto    |
| Hand 1 | Kitchen Counter | Thermi     |
| Hand 2 | Kitchen Counter | Acidobact  |
| Hand 2 | Kitchen Counter | Firmicutes |
| Hand 2 | Kitchen Counter | Gemmatimon |
| Hand 2 | Kitchen Counter | Proteobact |
| Hand 2 | Kitchen Counter | Thermi     |
| Hand 2 | Kitchen Counter | WPS2       |
| Hand 3 | Kitchen Counter | Actinobact |
| Hand 3 | Kitchen Counter | Bacteroid  |
| Hand 3 | Kitchen Counter | Cyanobact  |
| Hand 3 | Kitchen Counter | Gemmatimon |
| Hand 3 | Kitchen Counter | Plancto    |
| Hand 4 | Kitchen Counter | Crenarch   |
| Hand 4 | Kitchen Counter | Firmicutes |
| Hand 4 | Kitchen Counter | Proteobact |
| Hand 4 | Kitchen Counter | WPS2       |
| Hand 1 | Front Door Knob | Acidobact  |
| Hand 1 | Front Door Knob | AD3        |
| Hand 1 | Front Door Knob | Cyanobact  |
| Hand 1 | Front Door Knob | Firmicutes |
| Hand 1 | Front Door Knob | Proteobact |
| Hand 2 | Front Door Knob | Actinobact |
| Hand 2 | Front Door Knob | Bacteroid  |
| Hand 2 | Front Door Knob | Cyanobact  |
| Hand 2 | Front Door Knob | Gemmatimon |
| Hand 2 | Front Door Knob | Plancto    |
| Hand 3 | Front Door Knob | Firmicutes |
| Hand 3 | Front Door Knob | Proteobact |
| Hand 4 | Front Door Knob | Actinobact |
| Hand 4 | Front Door Knob | AD3        |
| Hand 4 | Front Door Knob | Crenarch   |
| Hand 4 | Front Door Knob | Gemmatimon |
| Hand 4 | Front Door Knob | Plancto    |
| Hand 4 | Front Door Knob | WPS2       |

|        |                    |            |
|--------|--------------------|------------|
| Foot 1 | Bedroom Floor      | AD3        |
| Foot 1 | Bedroom Floor      | Bacteroid  |
| Foot 1 | Bedroom Floor      | Cyanobact  |
| Foot 1 | Bedroom Floor      | Plancto    |
| Foot 1 | Bedroom Floor      | Proteobact |
| Foot 2 | Bedroom Floor      | Actinobact |
| Foot 2 | Bedroom Floor      | Bacteroid  |
| Foot 2 | Bedroom Floor      | Crenarch   |
| Foot 2 | Bedroom Floor      | Firmicutes |
| Foot 2 | Bedroom Floor      | Gemmatimon |
| Foot 2 | Bedroom Floor      | Thermi     |
| Foot 3 | Bedroom Floor      | Acidobact  |
| Foot 3 | Bedroom Floor      | Cyanobact  |
| Foot 3 | Bedroom Floor      | WPS2       |
| Foot 4 | Bedroom Floor      | Actinobact |
| Foot 4 | Bedroom Floor      | AD3        |
| Foot 4 | Bedroom Floor      | Firmicutes |
| Foot 4 | Bedroom Floor      | Plancto    |
| Foot 4 | Bedroom Floor      | Proteobact |
| Foot 4 | Bedroom Floor      | Thermi     |
| Hand 1 | Bathroom Door Knob | Bacteroid  |
| Hand 1 | Bathroom Door Knob | Gemmatimon |
| Hand 2 | Bathroom Door Knob | Actinobact |
| Hand 2 | Bathroom Door Knob | AD3        |
| Hand 2 | Bathroom Door Knob | Bacteroid  |
| Hand 2 | Bathroom Door Knob | Gemmatimon |
| Hand 2 | Bathroom Door Knob | Proteobact |
| Hand 2 | Bathroom Door Knob | Thermi     |
| Hand 3 | Bathroom Door Knob | Actinobact |
| Hand 3 | Bathroom Door Knob | Proteobact |
| Hand 4 | Bathroom Door Knob | Cyanobact  |
| Hand 4 | Bathroom Door Knob | Plancto    |
| Hand 4 | Bathroom Door Knob | Thermi     |
| Hand 4 | Bathroom Door Knob | WPS2       |
| Foot 1 | Nose 4             | Actinobact |
| Foot 1 | Nose 4             | Gemmatimon |
| Foot 1 | Nose 4             | Proteobact |
| Hand 1 | Nose 4             | Bacteroid  |
| Nose 1 | Nose 4             | Actinobact |
| Nose 1 | Nose 4             | Gemmatimon |
| Foot 2 | Nose 4             | Bacteroid  |
| Hand 2 | Nose 4             | Firmicutes |

|                      |        |            |
|----------------------|--------|------------|
| Nose 2               | Nose 4 | Acidobact  |
| Nose 2               | Nose 4 | Cyanobact  |
| Nose 2               | Nose 4 | Proteobact |
| Nose 2               | Nose 4 | Verruco    |
| Nose 2               | Nose 4 | WPS2       |
| Foot 3               | Nose 4 | Acidobact  |
| Foot 3               | Nose 4 | Thermi     |
| Hand 4               | Nose 4 | Firmicutes |
| Hand 4               | Nose 4 | WPS2       |
| Foot 1               | Hand 4 | Bacteroid  |
| Foot 1               | Hand 4 | Proteobact |
| Hand 1               | Hand 4 | Acidobact  |
| Hand 1               | Hand 4 | Gemmatimon |
| Nose 1               | Hand 4 | AD3        |
| Foot 2               | Hand 4 | Actinobact |
| Nose 2               | Hand 4 | WPS2       |
| Foot 3               | Hand 4 | Actinobact |
| Foot 3               | Hand 4 | Cyanobact  |
| Foot 3               | Hand 4 | WPS2       |
| Nose 3               | Hand 4 | Cyanobact  |
| Nose 3               | Hand 4 | Thermi     |
| Bathroom Door Knob   | Hand 4 | Firmicutes |
| Bathroom Door Knob   | Hand 4 | Gemmatimon |
| Bedroom Floor        | Hand 4 | Thermi     |
| Kitchen Counter      | Hand 4 | Bacteroid  |
| Kitchen Counter      | Hand 4 | Proteobact |
| Kitchen Counter      | Hand 4 | Verruco    |
| Kitchen Light Switch | Hand 4 | Acidobact  |
| Hand 1               | Foot 4 | Actinobact |
| Hand 1               | Foot 4 | Gemmatimon |
| Nose 1               | Foot 4 | Bacteroid  |
| Nose 1               | Foot 4 | Thermi     |
| Foot 2               | Foot 4 | AD3        |
| Hand 2               | Foot 4 | Plancto    |
| Nose 2               | Foot 4 | Cyanobact  |
| Nose 2               | Foot 4 | Gemmatimon |
| Foot 3               | Foot 4 | Bacteroid  |
| Foot 3               | Foot 4 | Proteobact |
| Hand 3               | Foot 4 | Thermi     |
| Hand 3               | Foot 4 | WPS2       |
| Nose 3               | Foot 4 | Actinobact |
| Nose 3               | Foot 4 | AD3        |

|               |        |            |
|---------------|--------|------------|
| Nose 3        | Foot 4 | Firmicutes |
| Hand 4        | Foot 4 | Plancto    |
| Hand 4        | Foot 4 | Proteobact |
| Hand 4        | Foot 4 | WPS2       |
| Bedroom Floor | Foot 4 | Acidobact  |
| Kitchen Floor | Foot 4 | Acidobact  |
| Kitchen Floor | Foot 4 | Cyanobact  |
| Kitchen Floor | Foot 4 | Firmicutes |
| Foot 1        | Nose 3 | Actinobact |
| Foot 1        | Nose 3 | Bacteroid  |
| Foot 1        | Nose 3 | Plancto    |
| Foot 1        | Nose 3 | Thermi     |
| Foot 1        | Nose 3 | WPS2       |
| Foot 2        | Nose 3 | Bacteroid  |
| Foot 2        | Nose 3 | Firmicutes |
| Nose 2        | Nose 3 | Proteobact |
| Foot 3        | Nose 3 | Acidobact  |
| Hand 3        | Nose 3 | Proteobact |
| Foot 4        | Nose 3 | Actinobact |
| Foot 4        | Nose 3 | Firmicutes |
| Hand 4        | Nose 3 | Acidobact  |
| Hand 4        | Nose 3 | Plancto    |
| Hand 4        | Nose 3 | WPS2       |
| Nose 4        | Nose 3 | Cyanobact  |
| Foot 1        | Hand 3 | Proteobact |
| Hand 1        | Hand 3 | Plancto    |
| Hand 1        | Hand 3 | Thermi     |
| Nose 1        | Hand 3 | Actinobact |
| Nose 1        | Hand 3 | AD3        |
| Nose 1        | Hand 3 | Firmicutes |
| Hand 2        | Hand 3 | Bacteroid  |
| Hand 2        | Hand 3 | Gemmatimon |
| Nose 2        | Hand 3 | Acidobact  |
| Nose 2        | Hand 3 | WPS2       |
| Foot 3        | Hand 3 | Acidobact  |
| Foot 3        | Hand 3 | Firmicutes |
| Foot 3        | Hand 3 | Gemmatimon |
| Nose 3        | Hand 3 | Actinobact |
| Nose 3        | Hand 3 | Bacteroid  |
| Nose 3        | Hand 3 | Cyanobact  |
| Nose 3        | Hand 3 | Thermi     |
| Hand 4        | Hand 3 | Verruco    |

|                    |        |            |
|--------------------|--------|------------|
| Hand 4             | Hand 3 | WPS2       |
| Bathroom Door Knob | Hand 3 | Plancto    |
| Bedroom Floor      | Hand 3 | Proteobact |
| Kitchen Counter    | Hand 3 | Cyanobact  |
| Kitchen Counter    | Hand 3 | Verruco    |
| Kitchen Floor      | Hand 3 | Crenarch   |
| Foot 1             | Foot 3 | Cyanobact  |
| Hand 1             | Foot 3 | Bacteroid  |
| Foot 2             | Foot 3 | Bacteroid  |
| Foot 2             | Foot 3 | Crenarch   |
| Foot 2             | Foot 3 | Verruco    |
| Hand 2             | Foot 3 | Thermi     |
| Nose 2             | Foot 3 | Actinobact |
| Nose 2             | Foot 3 | Plancto    |
| Nose 2             | Foot 3 | Proteobact |
| Hand 3             | Foot 3 | Cyanobact  |
| Hand 3             | Foot 3 | Firmicutes |
| Hand 3             | Foot 3 | Gemmatimon |
| Nose 3             | Foot 3 | Gemmatimon |
| Nose 3             | Foot 3 | Verruco    |
| Nose 3             | Foot 3 | WPS2       |
| Foot 4             | Foot 3 | Firmicutes |
| Hand 4             | Foot 3 | Thermi     |
| Bedroom Floor      | Foot 3 | AD3        |
| Bedroom Floor      | Foot 3 | WPS2       |
| Kitchen Floor      | Foot 3 | Actinobact |
| Kitchen Floor      | Foot 3 | AD3        |
| Kitchen Floor      | Foot 3 | Crenarch   |
| Kitchen Floor      | Foot 3 | Plancto    |
| Kitchen Floor      | Foot 3 | Proteobact |
| Foot 1             | Nose 2 | Acidobact  |
| Foot 1             | Nose 2 | Actinobact |
| Foot 1             | Nose 2 | Firmicutes |
| Foot 1             | Nose 2 | Gemmatimon |
| Hand 1             | Nose 2 | Thermi     |
| Nose 1             | Nose 2 | Proteobact |
| Foot 2             | Nose 2 | Bacteroid  |
| Hand 2             | Nose 2 | Acidobact  |
| Hand 2             | Nose 2 | Plancto    |
| Hand 2             | Nose 2 | WPS2       |
| Foot 3             | Nose 2 | Bacteroid  |
| Foot 3             | Nose 2 | Cyanobact  |

|                      |        |            |
|----------------------|--------|------------|
| Nose 3               | Nose 2 | Actinobact |
| Nose 3               | Nose 2 | Cyanobact  |
| Nose 3               | Nose 2 | Proteobact |
| Nose 3               | Nose 2 | Thermi     |
| Hand 4               | Nose 2 | Gemmatimon |
| Hand 4               | Nose 2 | Plancto    |
| Hand 4               | Nose 2 | WPS2       |
| Nose 4               | Nose 2 | Firmicutes |
| Foot 1               | Hand 2 | Firmicutes |
| Hand 1               | Hand 2 | Actinobact |
| Nose 1               | Hand 2 | AD3        |
| Nose 1               | Hand 2 | Proteobact |
| Nose 2               | Hand 2 | Bacteroid  |
| Nose 2               | Hand 2 | Plancto    |
| Foot 3               | Hand 2 | Acidobact  |
| Foot 3               | Hand 2 | Bacteroid  |
| Foot 3               | Hand 2 | Thermi     |
| Nose 3               | Hand 2 | Crenarch   |
| Foot 4               | Hand 2 | Cyanobact  |
| Hand 4               | Hand 2 | Actinobact |
| Hand 4               | Hand 2 | Verruco    |
| Hand 4               | Hand 2 | WPS2       |
| Nose 4               | Hand 2 | Acidobact  |
| Nose 4               | Hand 2 | Thermi     |
| Front Door Knob      | Hand 2 | Cyanobact  |
| Front Door Knob      | Hand 2 | Gemmatimon |
| Kitchen Counter      | Hand 2 | Gemmatimon |
| Kitchen Counter      | Hand 2 | Proteobact |
| Kitchen Counter      | Hand 2 | Verruco    |
| Kitchen Light Switch | Hand 2 | Plancto    |
| Kitchen Light Switch | Hand 2 | WPS2       |
| Foot 1               | Foot 2 | Crenarch   |
| Foot 1               | Foot 2 | Gemmatimon |
| Hand 1               | Foot 2 | Plancto    |
| Hand 1               | Foot 2 | Verruco    |
| Hand 2               | Foot 2 | Acidobact  |
| Hand 2               | Foot 2 | Firmicutes |
| Foot 3               | Foot 2 | Acidobact  |
| Foot 3               | Foot 2 | Crenarch   |
| Foot 3               | Foot 2 | Plancto    |
| Hand 3               | Foot 2 | Bacteroid  |
| Nose 3               | Foot 2 | Cyanobact  |



|               |        |            |
|---------------|--------|------------|
| Nose 3        | Foot 2 | Firmicutes |
| Nose 3        | Foot 2 | Proteobact |
| Foot 4        | Foot 2 | Actinobact |
| Hand 4        | Foot 2 | Verruco    |
| Hand 4        | Foot 2 | WPS2       |
| Bedroom Floor | Foot 2 | AD3        |
| Bedroom Floor | Foot 2 | Cyanobact  |
| Bedroom Floor | Foot 2 | Gemmatimon |
| Bedroom Floor | Foot 2 | Proteobact |
| Kitchen Floor | Foot 2 | AD3        |
| Kitchen Floor | Foot 2 | Bacteroid  |
| Foot 1        | Nose 1 | Acidobact  |
| Foot 1        | Nose 1 | Thermi     |
| Hand 1        | Nose 1 | Acidobact  |
| Hand 1        | Nose 1 | Actinobact |
| Hand 1        | Nose 1 | Gemmatimon |
| Hand 1        | Nose 1 | Plancto    |
| Hand 1        | Nose 1 | Proteobact |
| Foot 2        | Nose 1 | Thermi     |
| Nose 2        | Nose 1 | Cyanobact  |
| Foot 3        | Nose 1 | Actinobact |
| Hand 3        | Nose 1 | Firmicutes |
| Nose 3        | Nose 1 | Firmicutes |
| Hand 4        | Nose 1 | Plancto    |
| Hand 4        | Nose 1 | WPS2       |
| Foot 1        | Hand 1 | Acidobact  |
| Foot 1        | Hand 1 | AD3        |
| Foot 1        | Hand 1 | Verruco    |
| Nose 1        | Hand 1 | Gemmatimon |
| Foot 2        | Hand 1 | Plancto    |
| Hand 2        | Hand 1 | Actinobact |
| Hand 3        | Hand 1 | Proteobact |
| Hand 3        | Hand 1 | Thermi     |
| Nose 3        | Hand 1 | Bacteroid  |
| Nose 3        | Hand 1 | Gemmatimon |
| Nose 3        | Hand 1 | Thermi     |
| Foot 4        | Hand 1 | Cyanobact  |
| Foot 4        | Hand 1 | Verruco    |
| Hand 4        | Hand 1 | Firmicutes |
| Nose 4        | Hand 1 | Firmicutes |
| Bedroom Floor | Hand 1 | Acidobact  |
| Bedroom Floor | Hand 1 | AD3        |

|                 |        |            |
|-----------------|--------|------------|
| Bedroom Floor   | Hand 1 | Bacteroid  |
| Front Door Knob | Hand 1 | Actinobact |
| Kitchen Counter | Hand 1 | Cyanobact  |
| Kitchen Counter | Hand 1 | Proteobact |
| Kitchen Floor   | Hand 1 | Plancto    |
| Hand 1          | Foot 1 | Acidobact  |
| Foot 2          | Foot 1 | Actinobact |
| Foot 2          | Foot 1 | Crenarch   |
| Foot 2          | Foot 1 | Plancto    |
| Foot 2          | Foot 1 | Thermi     |
| Nose 2          | Foot 1 | Acidobact  |
| Nose 2          | Foot 1 | Proteobact |
| Foot 3          | Foot 1 | Actinobact |
| Foot 3          | Foot 1 | AD3        |
| Hand 3          | Foot 1 | Firmicutes |
| Hand 3          | Foot 1 | Gemmatimon |
| Nose 3          | Foot 1 | Bacteroid  |
| Nose 3          | Foot 1 | Verruco    |
| Nose 3          | Foot 1 | WPS2       |
| Foot 4          | Foot 1 | Gemmatimon |
| Foot 4          | Foot 1 | Plancto    |
| Foot 4          | Foot 1 | Proteobact |
| Foot 4          | Foot 1 | Thermi     |
| Hand 4          | Foot 1 | Verruco    |
| Hand 4          | Foot 1 | WPS2       |
| Nose 4          | Foot 1 | Firmicutes |
| Bedroom Floor   | Foot 1 | AD3        |
| Bedroom Floor   | Foot 1 | Cyanobact  |
| Kitchen Floor   | Foot 1 | Crenarch   |
| Kitchen Floor   | Foot 1 | Cyanobact  |

## House 2

| Source | Recipient            | Taxonomy    |
|--------|----------------------|-------------|
| Hand 1 | Kitchen Light Switch | Acidobact   |
| Hand 1 | Kitchen Light Switch | Actinobact  |
| Hand 1 | Kitchen Light Switch | Crenarch    |
| Hand 1 | Kitchen Light Switch | Cyanobact   |
| Hand 1 | Kitchen Light Switch | Firmicutes  |
| Hand 1 | Kitchen Light Switch | Proteobact  |
| Hand 1 | Kitchen Light Switch | Tenericutes |
| Hand 1 | Kitchen Light Switch | Thermi      |
| Hand 1 | Kitchen Light Switch | Verruco     |
| Foot 1 | Kitchen Floor        | Acidobact   |
| Foot 1 | Kitchen Floor        | Actinobact  |
| Foot 1 | Kitchen Floor        | Cyanobact   |
| Foot 1 | Kitchen Floor        | Firmicutes  |
| Foot 1 | Kitchen Floor        | Proteobact  |
| Foot 1 | Kitchen Floor        | Tenericutes |
| Foot 1 | Kitchen Floor        | Thermi      |
| Foot 1 | Kitchen Floor        | Verruco     |
| Nose 1 | Kitchen Counter      | Acidobact   |
| Nose 1 | Kitchen Counter      | Actinobact  |
| Nose 1 | Kitchen Counter      | Bacteroid   |
| Nose 1 | Kitchen Counter      | Cyanobact   |
| Nose 1 | Kitchen Counter      | Proteobact  |
| Nose 1 | Kitchen Counter      | Verruco     |
| Hand 1 | Front Door Knob      | Acidobact   |
| Hand 1 | Front Door Knob      | Cyanobact   |
| Hand 1 | Front Door Knob      | Firmicutes  |
| Hand 1 | Front Door Knob      | Proteobact  |
| Hand 1 | Front Door Knob      | Tenericutes |
| Foot 1 | Bedroom Floor        | Acidobact   |
| Foot 1 | Bedroom Floor        | Actinobact  |
| Foot 1 | Bedroom Floor        | Cyanobact   |
| Hand 1 | Bathroom Door Knob   | Actinobact  |
| Hand 1 | Bathroom Door Knob   | Firmicutes  |
| Hand 1 | Bathroom Door Knob   | Proteobact  |
| Hand 1 | Bathroom Door Knob   | Verruco     |
| Foot 1 | Nose 1               | Actinobact  |
| Foot 1 | Nose 1               | Cyanobact   |
| Foot 1 | Nose 1               | Firmicutes  |
| Foot 1 | Nose 1               | Verruco     |
| Hand 1 | Nose 1               | Acidobact   |

|                    |        |             |
|--------------------|--------|-------------|
| Hand 1             | Nose 1 | Actinobact  |
| Hand 1             | Nose 1 | Cyanobact   |
| Hand 1             | Nose 1 | Firmicutes  |
| Hand 1             | Nose 1 | Tenericutes |
| Hand 1             | Nose 1 | Verruco     |
| Foot 1             | Hand 1 | Cyanobact   |
| Nose 1             | Hand 1 | Actinobact  |
| Nose 1             | Hand 1 | Tenericutes |
| Bathroom Door Knob | Hand 1 | Firmicutes  |
| Bedroom Floor      | Hand 1 | Proteobact  |
| Bedroom Floor      | Hand 1 | Verruco     |
| Front Door Knob    | Hand 1 | Acidobact   |
| Front Door Knob    | Hand 1 | Actinobact  |
| Front Door Knob    | Hand 1 | Firmicutes  |
| Kitchen Counter    | Hand 1 | Proteobact  |
| Kitchen Floor      | Hand 1 | Tenericutes |
| Hand 1             | Foot 1 | Acidobact   |
| Hand 1             | Foot 1 | Actinobact  |
| Hand 1             | Foot 1 | Cyanobact   |
| Hand 1             | Foot 1 | Thermi      |
| Nose 1             | Foot 1 | Acidobact   |
| Nose 1             | Foot 1 | Cyanobact   |
| Nose 1             | Foot 1 | Firmicutes  |
| Nose 1             | Foot 1 | Verruco     |
| Bedroom Floor      | Foot 1 | Firmicutes  |
| Bedroom Floor      | Foot 1 | Proteobact  |
| Kitchen Floor      | Foot 1 | Actinobact  |
| Kitchen Floor      | Foot 1 | Proteobact  |
| Kitchen Floor      | Foot 1 | Verruco     |

### House 3

| Source | Recipient            | Taxonomy   |
|--------|----------------------|------------|
| Hand 1 | Kitchen Light Switch | Bacteroid  |
| Hand 1 | Kitchen Light Switch | Crenarch   |
| Hand 1 | Kitchen Light Switch | Firmicutes |
| Hand 1 | Kitchen Light Switch | Gemmatimon |
| Hand 1 | Kitchen Light Switch | SR1        |
| Hand 1 | Kitchen Light Switch | Thermi     |
| Hand 1 | Kitchen Light Switch | Verruco    |
| Hand 2 | Kitchen Light Switch | Acidobact  |
| Hand 2 | Kitchen Light Switch | Actinobact |
| Hand 2 | Kitchen Light Switch | Crenarch   |
| Hand 2 | Kitchen Light Switch | Gemmatimon |
| Hand 2 | Kitchen Light Switch | Proteobact |
| Hand 2 | Kitchen Light Switch | Thermi     |
| Hand 2 | Kitchen Light Switch | Verruco    |
| Hand 3 | Kitchen Light Switch | Acidobact  |
| Hand 3 | Kitchen Light Switch | Actinobact |
| Hand 3 | Kitchen Light Switch | Bacteroid  |
| Hand 3 | Kitchen Light Switch | Firmicutes |
| Hand 3 | Kitchen Light Switch | Proteobact |
| Hand 3 | Kitchen Light Switch | Spiroch    |
| Hand 1 | Kitchen Floor        | Bacteroid  |
| Hand 1 | Kitchen Floor        | Cyanobact  |
| Hand 1 | Kitchen Floor        | Fusobact   |
| Hand 2 | Kitchen Floor        | Actinobact |
| Hand 2 | Kitchen Floor        | Crenarch   |
| Hand 2 | Kitchen Floor        | Firmicutes |
| Hand 2 | Kitchen Floor        | Plancto    |
| Hand 2 | Kitchen Floor        | Proteobact |
| Hand 3 | Kitchen Floor        | Actinobact |
| Hand 3 | Kitchen Floor        | Crenarch   |
| Hand 3 | Kitchen Floor        | Cyanobact  |
| Hand 3 | Kitchen Floor        | Firmicutes |
| Hand 3 | Kitchen Floor        | Proteobact |
| Hand 1 | Kitchen Counter      | Actinobact |
| Hand 1 | Kitchen Counter      | Bacteroid  |
| Hand 1 | Kitchen Counter      | Firmicutes |
| Hand 1 | Kitchen Counter      | Fusobact   |
| Hand 1 | Kitchen Counter      | Gemmatimon |
| Hand 1 | Kitchen Counter      | Proteobact |
| Hand 1 | Kitchen Counter      | Spiroch    |

|        |                 |             |
|--------|-----------------|-------------|
| Hand 1 | Kitchen Counter | Verruco     |
| Hand 2 | Kitchen Counter | Acidobact   |
| Hand 2 | Kitchen Counter | Actinobact  |
| Hand 2 | Kitchen Counter | Bacteroid   |
| Hand 2 | Kitchen Counter | Firmicutes  |
| Hand 2 | Kitchen Counter | Gemmatimon  |
| Hand 2 | Kitchen Counter | Proteobact  |
| Hand 3 | Kitchen Counter | Spiroch     |
| Hand 3 | Kitchen Counter | Tenericutes |
| Hand 3 | Kitchen Counter | Verruco     |
| Hand 1 | Front Door Knob | Acidobact   |
| Hand 1 | Front Door Knob | Bacteroid   |
| Hand 1 | Front Door Knob | Crenarch    |
| Hand 1 | Front Door Knob | Fusobact    |
| Hand 1 | Front Door Knob | Gemmatimon  |
| Hand 1 | Front Door Knob | Tenericutes |
| Hand 1 | Front Door Knob | Thermi      |
| Hand 2 | Front Door Knob | Actinobact  |
| Hand 2 | Front Door Knob | Cyanobact   |
| Hand 2 | Front Door Knob | Gemmatimon  |
| Hand 2 | Front Door Knob | Proteobact  |
| Hand 2 | Front Door Knob | Spiroch     |
| Hand 2 | Front Door Knob | Thermi      |
| Hand 2 | Front Door Knob | Verruco     |
| Hand 3 | Front Door Knob | Acidobact   |
| Hand 3 | Front Door Knob | Actinobact  |
| Hand 3 | Front Door Knob | Bacteroid   |
| Hand 3 | Front Door Knob | Cyanobact   |
| Hand 3 | Front Door Knob | Firmicutes  |
| Hand 3 | Front Door Knob | Proteobact  |
| Hand 3 | Front Door Knob | Tenericutes |
| Hand 3 | Front Door Knob | Verruco     |
| Foot 1 | Bedroom Floor   | Actinobact  |
| Foot 1 | Bedroom Floor   | Firmicutes  |
| Foot 1 | Bedroom Floor   | Fusobact    |
| Foot 1 | Bedroom Floor   | Proteobact  |
| Foot 1 | Bedroom Floor   | Tenericutes |
| Foot 2 | Bedroom Floor   | Actinobact  |
| Foot 2 | Bedroom Floor   | Cyanobact   |
| Foot 2 | Bedroom Floor   | Firmicutes  |
| Foot 2 | Bedroom Floor   | Plancto     |
| Foot 2 | Bedroom Floor   | Verruco     |

|        |                    |             |
|--------|--------------------|-------------|
| Foot 3 | Bedroom Floor      | Crenarch    |
| Foot 3 | Bedroom Floor      | Cyanobact   |
| Foot 3 | Bedroom Floor      | Fusobact    |
| Foot 3 | Bedroom Floor      | Plancto     |
| Foot 3 | Bedroom Floor      | Proteobact  |
| Foot 3 | Bedroom Floor      | Verruco     |
| Hand 1 | Bathroom Door Knob | Acidobact   |
| Hand 1 | Bathroom Door Knob | Actinobact  |
| Hand 1 | Bathroom Door Knob | Bacteroid   |
| Hand 1 | Bathroom Door Knob | Fusobact    |
| Hand 1 | Bathroom Door Knob | Gemmatimon  |
| Hand 1 | Bathroom Door Knob | Plancto     |
| Hand 2 | Bathroom Door Knob | Actinobact  |
| Hand 2 | Bathroom Door Knob | Fusobact    |
| Hand 2 | Bathroom Door Knob | Spiroch     |
| Hand 2 | Bathroom Door Knob | SR1         |
| Hand 2 | Bathroom Door Knob | Tenericutes |
| Hand 3 | Bathroom Door Knob | Acidobact   |
| Hand 3 | Bathroom Door Knob | Bacteroid   |
| Hand 3 | Bathroom Door Knob | Firmicutes  |
| Hand 3 | Bathroom Door Knob | Gemmatimon  |
| Hand 3 | Bathroom Door Knob | Plancto     |
| Hand 3 | Bathroom Door Knob | Spiroch     |
| Hand 3 | Bathroom Door Knob | SR1         |
| Foot 1 | Nose 3             | Plancto     |
| Hand 1 | Nose 3             | Acidobact   |
| Hand 1 | Nose 3             | Gemmatimon  |
| Hand 1 | Nose 3             | Proteobact  |
| Hand 1 | Nose 3             | Tenericutes |
| Nose 1 | Nose 3             | Actinobact  |
| Nose 1 | Nose 3             | Bacteroid   |
| Nose 1 | Nose 3             | Crenarch    |
| Nose 1 | Nose 3             | Fusobact    |
| Nose 1 | Nose 3             | Plancto     |
| Nose 1 | Nose 3             | Spiroch     |
| Nose 1 | Nose 3             | Thermi      |
| Nose 1 | Nose 3             | Verruco     |
| Foot 2 | Nose 3             | Bacteroid   |
| Foot 2 | Nose 3             | Firmicutes  |
| Foot 2 | Nose 3             | Tenericutes |
| Hand 2 | Nose 3             | Actinobact  |
| Hand 2 | Nose 3             | Crenarch    |

|                      |        |             |
|----------------------|--------|-------------|
| Hand 2               | Nose 3 | Spiroch     |
| Hand 2               | Nose 3 | Verruco     |
| Nose 2               | Nose 3 | SR1         |
| Foot 3               | Nose 3 | Firmicutes  |
| Foot 3               | Nose 3 | Gemmatimon  |
| Hand 3               | Nose 3 | Acidobact   |
| Hand 3               | Nose 3 | Proteobact  |
| Hand 3               | Nose 3 | Thermi      |
| Foot 1               | Hand 3 | Acidobact   |
| Hand 1               | Hand 3 | Fusobact    |
| Hand 1               | Hand 3 | Gemmatimon  |
| Nose 1               | Hand 3 | Bacteroid   |
| Nose 1               | Hand 3 | Cyanobact   |
| Nose 1               | Hand 3 | Plancto     |
| Foot 2               | Hand 3 | Plancto     |
| Foot 2               | Hand 3 | SR1         |
| Hand 2               | Hand 3 | Tenericutes |
| Nose 2               | Hand 3 | Gemmatimon  |
| Nose 2               | Hand 3 | Thermi      |
| Nose 3               | Hand 3 | SR1         |
| Bathroom Door Knob   | Hand 3 | Bacteroid   |
| Bedroom Floor        | Hand 3 | Fusobact    |
| Front Door Knob      | Hand 3 | Acidobact   |
| Front Door Knob      | Hand 3 | Actinobact  |
| Front Door Knob      | Hand 3 | Firmicutes  |
| Front Door Knob      | Hand 3 | Proteobact  |
| Kitchen Counter      | Hand 3 | Crenarch    |
| Kitchen Counter      | Hand 3 | Tenericutes |
| Kitchen Counter      | Hand 3 | Verruco     |
| Kitchen Floor        | Hand 3 | Actinobact  |
| Kitchen Floor        | Hand 3 | Crenarch    |
| Kitchen Floor        | Hand 3 | Cyanobact   |
| Kitchen Floor        | Hand 3 | Thermi      |
| Kitchen Light Switch | Hand 3 | Verruco     |
| Foot 1               | Foot 3 | Acidobact   |
| Foot 1               | Foot 3 | Crenarch    |
| Foot 1               | Foot 3 | Firmicutes  |
| Foot 1               | Foot 3 | Fusobact    |
| Foot 1               | Foot 3 | Spiroch     |
| Foot 1               | Foot 3 | SR1         |
| Foot 1               | Foot 3 | Tenericutes |
| Hand 1               | Foot 3 | Actinobact  |



|               |        |             |
|---------------|--------|-------------|
| Hand 1        | Foot 3 | Crenarch    |
| Hand 1        | Foot 3 | Thermi      |
| Nose 1        | Foot 3 | Actinobact  |
| Nose 1        | Foot 3 | Proteobact  |
| Nose 1        | Foot 3 | Verruco     |
| Foot 2        | Foot 3 | Gemmatimon  |
| Foot 2        | Foot 3 | Tenericutes |
| Foot 2        | Foot 3 | Thermi      |
| Hand 2        | Foot 3 | Fusobact    |
| Nose 2        | Foot 3 | Gemmatimon  |
| Hand 3        | Foot 3 | Spiroch     |
| Nose 3        | Foot 3 | Firmicutes  |
| Bedroom Floor | Foot 3 | Bacteroid   |
| Bedroom Floor | Foot 3 | SR1         |
| Kitchen Floor | Foot 3 | Acidobact   |
| Kitchen Floor | Foot 3 | Bacteroid   |
| Foot 1        | Nose 2 | Crenarch    |
| Foot 1        | Nose 2 | Firmicutes  |
| Foot 1        | Nose 2 | Gemmatimon  |
| Foot 1        | Nose 2 | Plancto     |
| Foot 1        | Nose 2 | Verruco     |
| Hand 1        | Nose 2 | Crenarch    |
| Hand 1        | Nose 2 | Fusobact    |
| Hand 1        | Nose 2 | SR1         |
| Nose 1        | Nose 2 | Acidobact   |
| Nose 1        | Nose 2 | Plancto     |
| Nose 1        | Nose 2 | Thermi      |
| Nose 1        | Nose 2 | Verruco     |
| Foot 2        | Nose 2 | Actinobact  |
| Foot 2        | Nose 2 | SR1         |
| Hand 2        | Nose 2 | Bacteroid   |
| Foot 3        | Nose 2 | Proteobact  |
| Hand 3        | Nose 2 | Actinobact  |
| Hand 3        | Nose 2 | Firmicutes  |
| Nose 3        | Nose 2 | Bacteroid   |
| Nose 3        | Nose 2 | Proteobact  |
| Nose 3        | Nose 2 | Thermi      |
| Hand 1        | Hand 2 | Actinobact  |
| Nose 1        | Hand 2 | Crenarch    |
| Nose 1        | Hand 2 | Gemmatimon  |
| Nose 1        | Hand 2 | Plancto     |
| Nose 1        | Hand 2 | Proteobact  |

|                      |        |             |
|----------------------|--------|-------------|
| Nose 1               | Hand 2 | Spiroch     |
| Nose 1               | Hand 2 | Thermi      |
| Foot 2               | Hand 2 | Proteobact  |
| Foot 2               | Hand 2 | SR1         |
| Nose 2               | Hand 2 | Bacteroid   |
| Nose 2               | Hand 2 | Fusobact    |
| Nose 2               | Hand 2 | Verruco     |
| Foot 3               | Hand 2 | Fusobact    |
| Foot 3               | Hand 2 | Verruco     |
| Hand 3               | Hand 2 | Spiroch     |
| Nose 3               | Hand 2 | Gemmatimon  |
| Nose 3               | Hand 2 | SR1         |
| Bathroom Door Knob   | Hand 2 | Tenericutes |
| Bedroom Floor        | Hand 2 | Acidobact   |
| Bedroom Floor        | Hand 2 | Bacteroid   |
| Bedroom Floor        | Hand 2 | Crenarch    |
| Bedroom Floor        | Hand 2 | Plancto     |
| Front Door Knob      | Hand 2 | Firmicutes  |
| Front Door Knob      | Hand 2 | Tenericutes |
| Kitchen Floor        | Hand 2 | Firmicutes  |
| Kitchen Floor        | Hand 2 | Thermi      |
| Kitchen Light Switch | Hand 2 | Actinobact  |
| Foot 1               | Foot 2 | Acidobact   |
| Foot 1               | Foot 2 | Firmicutes  |
| Foot 1               | Foot 2 | Fusobact    |
| Foot 1               | Foot 2 | Gemmatimon  |
| Hand 1               | Foot 2 | Plancto     |
| Nose 1               | Foot 2 | Actinobact  |
| Hand 2               | Foot 2 | Acidobact   |
| Hand 2               | Foot 2 | Crenarch    |
| Hand 2               | Foot 2 | Tenericutes |
| Hand 2               | Foot 2 | Verruco     |
| Nose 2               | Foot 2 | Cyanobact   |
| Nose 2               | Foot 2 | Fusobact    |
| Nose 2               | Foot 2 | Verruco     |
| Foot 3               | Foot 2 | Bacteroid   |
| Foot 3               | Foot 2 | Crenarch    |
| Foot 3               | Foot 2 | Spiroch     |
| Foot 3               | Foot 2 | SR1         |
| Hand 3               | Foot 2 | Firmicutes  |
| Hand 3               | Foot 2 | Proteobact  |
| Hand 3               | Foot 2 | Spiroch     |

|               |        |             |
|---------------|--------|-------------|
| Hand 3        | Foot 2 | Thermi      |
| Nose 3        | Foot 2 | Proteobact  |
| Bedroom Floor | Foot 2 | Plancto     |
| Bedroom Floor | Foot 2 | Thermi      |
| Kitchen Floor | Foot 2 | Actinobact  |
| Kitchen Floor | Foot 2 | Bacteroid   |
| Kitchen Floor | Foot 2 | SR1         |
| Foot 1        | Nose 1 | Acidobact   |
| Foot 1        | Nose 1 | Cyanobact   |
| Foot 1        | Nose 1 | Gemmatimon  |
| Foot 1        | Nose 1 | Proteobact  |
| Hand 1        | Nose 1 | Acidobact   |
| Hand 1        | Nose 1 | Bacteroid   |
| Hand 1        | Nose 1 | Spiroch     |
| Hand 1        | Nose 1 | Thermi      |
| Foot 2        | Nose 1 | Actinobact  |
| Foot 2        | Nose 1 | Crenarch    |
| Foot 2        | Nose 1 | SR1         |
| Foot 2        | Nose 1 | Tenericutes |
| Hand 2        | Nose 1 | Crenarch    |
| Hand 2        | Nose 1 | Fusobact    |
| Hand 2        | Nose 1 | Proteobact  |
| Hand 2        | Nose 1 | Spiroch     |
| Hand 2        | Nose 1 | Tenericutes |
| Nose 2        | Nose 1 | Cyanobact   |
| Nose 2        | Nose 1 | Verruco     |
| Foot 3        | Nose 1 | Firmicutes  |
| Foot 3        | Nose 1 | Gemmatimon  |
| Foot 3        | Nose 1 | SR1         |
| Foot 3        | Nose 1 | Thermi      |
| Hand 3        | Nose 1 | Bacteroid   |
| Hand 3        | Nose 1 | Firmicutes  |
| Hand 3        | Nose 1 | Fusobact    |
| Nose 3        | Nose 1 | Actinobact  |
| Nose 3        | Nose 1 | Verruco     |
| Foot 1        | Hand 1 | Crenarch    |
| Foot 1        | Hand 1 | Tenericutes |
| Foot 1        | Hand 1 | Thermi      |
| Nose 1        | Hand 1 | Verruco     |
| Foot 2        | Hand 1 | Firmicutes  |
| Hand 2        | Hand 1 | Acidobact   |
| Hand 2        | Hand 1 | Bacteroid   |

|                      |        |             |
|----------------------|--------|-------------|
| Hand 2               | Hand 1 | Cyanobact   |
| Hand 2               | Hand 1 | Gemmatimon  |
| Hand 2               | Hand 1 | Plancto     |
| Hand 2               | Hand 1 | Verruco     |
| Foot 3               | Hand 1 | Bacteroid   |
| Foot 3               | Hand 1 | Fusobact    |
| Foot 3               | Hand 1 | SR1         |
| Hand 3               | Hand 1 | Acidobact   |
| Hand 3               | Hand 1 | Firmicutes  |
| Nose 3               | Hand 1 | Gemmatimon  |
| Nose 3               | Hand 1 | Plancto     |
| Nose 3               | Hand 1 | Proteobact  |
| Bathroom Door Knob   | Hand 1 | Actinobact  |
| Bathroom Door Knob   | Hand 1 | Fusobact    |
| Bathroom Door Knob   | Hand 1 | Proteobact  |
| Bathroom Door Knob   | Hand 1 | Spiroch     |
| Front Door Knob      | Hand 1 | Actinobact  |
| Front Door Knob      | Hand 1 | Tenericutes |
| Kitchen Counter      | Hand 1 | SR1         |
| Kitchen Floor        | Hand 1 | Crenarch    |
| Kitchen Light Switch | Hand 1 | Cyanobact   |
| Kitchen Light Switch | Hand 1 | Thermi      |
| Hand 1               | Foot 1 | Acidobact   |
| Hand 1               | Foot 1 | Actinobact  |
| Hand 1               | Foot 1 | Gemmatimon  |
| Nose 1               | Foot 1 | Crenarch    |
| Foot 2               | Foot 1 | Proteobact  |
| Hand 2               | Foot 1 | Actinobact  |
| Nose 2               | Foot 1 | Firmicutes  |
| Nose 2               | Foot 1 | Fusobact    |
| Nose 2               | Foot 1 | Plancto     |
| Nose 2               | Foot 1 | Thermi      |
| Foot 3               | Foot 1 | Firmicutes  |
| Foot 3               | Foot 1 | Spiroch     |
| Hand 3               | Foot 1 | Acidobact   |
| Hand 3               | Foot 1 | Cyanobact   |
| Nose 3               | Foot 1 | Crenarch    |
| Nose 3               | Foot 1 | Gemmatimon  |
| Nose 3               | Foot 1 | Proteobact  |
| Nose 3               | Foot 1 | Verruco     |
| Bedroom Floor        | Foot 1 | Cyanobact   |
| Bedroom Floor        | Foot 1 | Fusobact    |

|               |        |           |
|---------------|--------|-----------|
| Bedroom Floor | Foot 1 | Plancto   |
| Kitchen Floor | Foot 1 | Bacteroid |
| Kitchen Floor | Foot 1 | Spiroch   |
| Kitchen Floor | Foot 1 | Thermi    |

#### House 4

| Source     | Recipient            | Taxonomy    |
|------------|----------------------|-------------|
| Hand 1     | Kitchen Light Switch | Acidobact   |
| Hand 1     | Kitchen Light Switch | Actinobact  |
| Hand 1     | Kitchen Light Switch | Bacteroid   |
| Hand 1     | Kitchen Light Switch | Crenarch    |
| Hand 1     | Kitchen Light Switch | Fusobact    |
| Hand 1     | Kitchen Light Switch | Plancto     |
| Hand 1     | Kitchen Light Switch | Proteobact  |
| Hand 1     | Kitchen Light Switch | SR1         |
| Hand 1     | Kitchen Light Switch | Tenericutes |
| Hand 1     | Kitchen Light Switch | Thermi      |
| Hand 1     | Kitchen Light Switch | Verruco     |
| Hand 2     | Kitchen Light Switch | Actinobact  |
| Hand 2     | Kitchen Light Switch | Bacteroid   |
| Hand 2     | Kitchen Light Switch | Crenarch    |
| Hand 2     | Kitchen Light Switch | Cyanobact   |
| Hand 2     | Kitchen Light Switch | Firmicutes  |
| Hand 2     | Kitchen Light Switch | Gemmatimon  |
| Hand 2     | Kitchen Light Switch | Proteobact  |
| Hand 2     | Kitchen Light Switch | Tenericutes |
| Hand 3     | Kitchen Light Switch | Acidobact   |
| Hand 3     | Kitchen Light Switch | Cyanobact   |
| Hand 3     | Kitchen Light Switch | Fusobact    |
| Hand 3     | Kitchen Light Switch | Gemmatimon  |
| Hand 3     | Kitchen Light Switch | Plancto     |
| Hand 3     | Kitchen Light Switch | SR1         |
| Hand 3     | Kitchen Light Switch | Thermi      |
| Hand 3     | Kitchen Light Switch | Verruco     |
| Dog Nose 1 | Kitchen Floor        | Cyanobact   |
| Dog Nose 1 | Kitchen Floor        | Firmicutes  |
| Dog Foot 2 | Kitchen Floor        | Bacteroid   |
| Dog Foot 2 | Kitchen Floor        | Spiroch     |
| Dog Foot 2 | Kitchen Floor        | Tenericutes |
| Dog Foot 2 | Kitchen Floor        | Thermi      |
| Dog Nose 2 | Kitchen Floor        | Fusobact    |
| Dog Nose 2 | Kitchen Floor        | Gemmatimon  |
| Dog Foot 3 | Kitchen Floor        | Acidobact   |
| Dog Foot 3 | Kitchen Floor        | Fusobact    |
| Dog Foot 3 | Kitchen Floor        | SR1         |
| Dog Nose 3 | Kitchen Floor        | Crenarch    |
| Dog Nose 3 | Kitchen Floor        | Thermi      |

|               |                 |             |
|---------------|-----------------|-------------|
| Foot 1        | Kitchen Floor   | SR1         |
| Foot 1        | Kitchen Floor   | Verruco     |
| Foot 2        | Kitchen Floor   | Actinobact  |
| Foot 2        | Kitchen Floor   | Crenarch    |
| Foot 2        | Kitchen Floor   | Plancto     |
| Foot 2        | Kitchen Floor   | Proteobact  |
| Foot 2        | Kitchen Floor   | Spiroch     |
| Foot 3        | Kitchen Floor   | Actinobact  |
| Foot 3        | Kitchen Floor   | Bacteroid   |
| Foot 3        | Kitchen Floor   | Cyanobact   |
| Foot 3        | Kitchen Floor   | Firmicutes  |
| Foot 3        | Kitchen Floor   | Plancto     |
| Nose 3        | Kitchen Floor   | Acidobact   |
| Nose 3        | Kitchen Floor   | Proteobact  |
| Nose 3        | Kitchen Floor   | Verruco     |
| Hand 1        | Kitchen Counter | Acidobact   |
| Hand 1        | Kitchen Counter | Actinobact  |
| Hand 1        | Kitchen Counter | Bacteroid   |
| Hand 1        | Kitchen Counter | Firmicutes  |
| Hand 1        | Kitchen Counter | Proteobact  |
| Hand 1        | Kitchen Counter | Tenericutes |
| Hand 1        | Kitchen Counter | Verruco     |
| Hand 2        | Kitchen Counter | Acidobact   |
| Hand 2        | Kitchen Counter | Bacteroid   |
| Hand 2        | Kitchen Counter | Crenarch    |
| Hand 2        | Kitchen Counter | Proteobact  |
| Hand 2        | Kitchen Counter | Verruco     |
| Hand 3        | Kitchen Counter | Actinobact  |
| Hand 3        | Kitchen Counter | Firmicutes  |
| Hand 3        | Kitchen Counter | Tenericutes |
| Kitchen Floor | Kitchen Counter | Spiroch     |
| Hand 1        | Front Door Knob | Actinobact  |
| Hand 1        | Front Door Knob | Bacteroid   |
| Hand 1        | Front Door Knob | Crenarch    |
| Hand 1        | Front Door Knob | Fusobact    |
| Hand 1        | Front Door Knob | Gemmatimon  |
| Hand 1        | Front Door Knob | Plancto     |
| Hand 1        | Front Door Knob | Tenericutes |
| Hand 2        | Front Door Knob | Actinobact  |
| Hand 2        | Front Door Knob | Cyanobact   |
| Hand 2        | Front Door Knob | Firmicutes  |
| Hand 2        | Front Door Knob | Fusobact    |

|            |                    |             |
|------------|--------------------|-------------|
| Hand 2     | Front Door Knob    | Plancto     |
| Hand 2     | Front Door Knob    | Proteobact  |
| Hand 2     | Front Door Knob    | Spiroch     |
| Hand 2     | Front Door Knob    | Tenericutes |
| Hand 3     | Front Door Knob    | Bacteroid   |
| Hand 3     | Front Door Knob    | Crenarch    |
| Hand 3     | Front Door Knob    | Cyanobact   |
| Hand 3     | Front Door Knob    | Proteobact  |
| Hand 3     | Front Door Knob    | Spiroch     |
| Hand 3     | Front Door Knob    | Verruco     |
| Dog Nose 1 | Bedroom Floor      | Actinobact  |
| Dog Nose 1 | Bedroom Floor      | Bacteroid   |
| Dog Nose 1 | Bedroom Floor      | Cyanobact   |
| Dog Nose 1 | Bedroom Floor      | Fusobact    |
| Dog Foot 2 | Bedroom Floor      | Crenarch    |
| Dog Foot 2 | Bedroom Floor      | Proteobact  |
| Dog Foot 2 | Bedroom Floor      | Verruco     |
| Dog Nose 2 | Bedroom Floor      | Gemmatimon  |
| Dog Nose 2 | Bedroom Floor      | Spiroch     |
| Dog Foot 3 | Bedroom Floor      | Acidobact   |
| Dog Foot 3 | Bedroom Floor      | Crenarch    |
| Dog Foot 3 | Bedroom Floor      | Cyanobact   |
| Dog Foot 3 | Bedroom Floor      | Spiroch     |
| Dog Foot 3 | Bedroom Floor      | SR1         |
| Dog Foot 3 | Bedroom Floor      | Thermi      |
| Dog Nose 3 | Bedroom Floor      | Bacteroid   |
| Dog Nose 3 | Bedroom Floor      | Plancto     |
| Dog Nose 3 | Bedroom Floor      | Verruco     |
| Foot 1     | Bedroom Floor      | Firmicutes  |
| Foot 1     | Bedroom Floor      | Gemmatimon  |
| Foot 1     | Bedroom Floor      | SR1         |
| Foot 1     | Bedroom Floor      | Tenericutes |
| Foot 2     | Bedroom Floor      | Firmicutes  |
| Foot 2     | Bedroom Floor      | Plancto     |
| Foot 3     | Bedroom Floor      | Acidobact   |
| Foot 3     | Bedroom Floor      | Fusobact    |
| Foot 3     | Bedroom Floor      | Proteobact  |
| Foot 3     | Bedroom Floor      | Tenericutes |
| Hand 1     | Bathroom Door Knob | Acidobact   |
| Hand 1     | Bathroom Door Knob | Actinobact  |
| Hand 1     | Bathroom Door Knob | Bacteroid   |
| Hand 1     | Bathroom Door Knob | Crenarch    |



|            |                    |             |
|------------|--------------------|-------------|
| Hand 1     | Bathroom Door Knob | Spiroch     |
| Hand 1     | Bathroom Door Knob | SR1         |
| Hand 1     | Bathroom Door Knob | Tenericutes |
| Hand 1     | Bathroom Door Knob | Verruco     |
| Hand 2     | Bathroom Door Knob | Actinobact  |
| Hand 2     | Bathroom Door Knob | Bacteroid   |
| Hand 2     | Bathroom Door Knob | Cyanobact   |
| Hand 2     | Bathroom Door Knob | Fusobact    |
| Hand 2     | Bathroom Door Knob | Proteobact  |
| Hand 2     | Bathroom Door Knob | Spiroch     |
| Hand 2     | Bathroom Door Knob | SR1         |
| Hand 2     | Bathroom Door Knob | Tenericutes |
| Hand 3     | Bathroom Door Knob | Acidobact   |
| Hand 3     | Bathroom Door Knob | Cyanobact   |
| Hand 3     | Bathroom Door Knob | Firmicutes  |
| Hand 3     | Bathroom Door Knob | Fusobact    |
| Dog Foot 1 | Nose 3             | Actinobact  |
| Dog Foot 2 | Nose 3             | Acidobact   |
| Dog Foot 2 | Nose 3             | Actinobact  |
| Dog Nose 2 | Nose 3             | Proteobact  |
| Dog Foot 3 | Nose 3             | Thermi      |
| Dog Nose 3 | Nose 3             | Crenarch    |
| Dog Nose 3 | Nose 3             | Spiroch     |
| Foot 1     | Nose 3             | Cyanobact   |
| Foot 1     | Nose 3             | SR1         |
| Foot 1     | Nose 3             | Thermi      |
| Hand 1     | Nose 3             | Cyanobact   |
| Hand 1     | Nose 3             | Firmicutes  |
| Hand 1     | Nose 3             | Plancto     |
| Hand 1     | Nose 3             | SR1         |
| Nose 1     | Nose 3             | Firmicutes  |
| Nose 1     | Nose 3             | Fusobact    |
| Foot 2     | Nose 3             | Gemmatimon  |
| Foot 2     | Nose 3             | Plancto     |
| Hand 2     | Nose 3             | Crenarch    |
| Foot 3     | Nose 3             | Acidobact   |
| Foot 3     | Nose 3             | Gemmatimon  |
| Foot 3     | Nose 3             | Spiroch     |
| Hand 3     | Nose 3             | Fusobact    |
| Hand 3     | Nose 3             | Proteobact  |
| Dog Foot 1 | Hand 3             | Cyanobact   |
| Dog Nose 1 | Hand 3             | Proteobact  |

|                      |        |             |
|----------------------|--------|-------------|
| Dog Foot 2           | Hand 3 | Acidobact   |
| Dog Foot 2           | Hand 3 | Tenericutes |
| Dog Nose 2           | Hand 3 | Bacteroid   |
| Dog Nose 2           | Hand 3 | Thermi      |
| Dog Nose 3           | Hand 3 | Firmicutes  |
| Hand 1               | Hand 3 | Plancto     |
| Nose 1               | Hand 3 | Spiroch     |
| Foot 2               | Hand 3 | Plancto     |
| Foot 2               | Hand 3 | Proteobact  |
| Hand 2               | Hand 3 | Actinobact  |
| Nose 2               | Hand 3 | SR1         |
| Nose 2               | Hand 3 | Tenericutes |
| Nose 3               | Hand 3 | Gemmatimon  |
| Nose 3               | Hand 3 | Thermi      |
| Bathroom Door Knob   | Hand 3 | Acidobact   |
| Bathroom Door Knob   | Hand 3 | Actinobact  |
| Bathroom Door Knob   | Hand 3 | Spiroch     |
| Bedroom Floor        | Hand 3 | Crenarch    |
| Bedroom Floor        | Hand 3 | Fusobact    |
| Front Door Knob      | Hand 3 | Bacteroid   |
| Front Door Knob      | Hand 3 | Cyanobact   |
| Kitchen Counter      | Hand 3 | Firmicutes  |
| Kitchen Counter      | Hand 3 | Verruco     |
| Kitchen Light Switch | Hand 3 | Crenarch    |
| Kitchen Light Switch | Hand 3 | SR1         |
| Kitchen Light Switch | Hand 3 | Verruco     |
| Dog Foot 2           | Foot 3 | Spiroch     |
| Dog Nose 2           | Foot 3 | Firmicutes  |
| Dog Nose 2           | Foot 3 | Gemmatimon  |
| Dog Nose 2           | Foot 3 | Tenericutes |
| Dog Foot 3           | Foot 3 | Cyanobact   |
| Dog Foot 3           | Foot 3 | Gemmatimon  |
| Dog Foot 3           | Foot 3 | SR1         |
| Dog Foot 3           | Foot 3 | Verruco     |
| Dog Nose 3           | Foot 3 | Plancto     |
| Hand 1               | Foot 3 | Cyanobact   |
| Hand 1               | Foot 3 | Fusobact    |
| Hand 1               | Foot 3 | Plancto     |
| Hand 1               | Foot 3 | Spiroch     |
| Hand 1               | Foot 3 | Tenericutes |
| Hand 1               | Foot 3 | Verruco     |
| Nose 1               | Foot 3 | Proteobact  |

|               |        |             |
|---------------|--------|-------------|
| Foot 2        | Foot 3 | Thermi      |
| Hand 2        | Foot 3 | Actinobact  |
| Hand 2        | Foot 3 | Bacteroid   |
| Hand 2        | Foot 3 | Crenarch    |
| Nose 2        | Foot 3 | Acidobact   |
| Nose 2        | Foot 3 | Fusobact    |
| Nose 2        | Foot 3 | Thermi      |
| Hand 3        | Foot 3 | Actinobact  |
| Hand 3        | Foot 3 | Crenarch    |
| Bedroom Floor | Foot 3 | Bacteroid   |
| Kitchen Floor | Foot 3 | Acidobact   |
| Kitchen Floor | Foot 3 | Proteobact  |
| Kitchen Floor | Foot 3 | SR1         |
| Dog Foot 1    | Nose 2 | Actinobact  |
| Dog Foot 1    | Nose 2 | Proteobact  |
| Dog Nose 1    | Nose 2 | Fusobact    |
| Dog Nose 1    | Nose 2 | Plancto     |
| Dog Foot 2    | Nose 2 | Cyanobact   |
| Dog Foot 2    | Nose 2 | SR1         |
| Dog Nose 2    | Nose 2 | Tenericutes |
| Dog Nose 2    | Nose 2 | Verruco     |
| Dog Foot 3    | Nose 2 | Bacteroid   |
| Dog Foot 3    | Nose 2 | Fusobact    |
| Dog Nose 3    | Nose 2 | Tenericutes |
| Dog Nose 3    | Nose 2 | Thermi      |
| Dog Nose 3    | Nose 2 | Verruco     |
| Foot 1        | Nose 2 | Firmicutes  |
| Hand 1        | Nose 2 | Acidobact   |
| Hand 1        | Nose 2 | Actinobact  |
| Hand 1        | Nose 2 | Proteobact  |
| Nose 1        | Nose 2 | Cyanobact   |
| Nose 1        | Nose 2 | SR1         |
| Foot 2        | Nose 2 | Acidobact   |
| Foot 2        | Nose 2 | Firmicutes  |
| Hand 2        | Nose 2 | Crenarch    |
| Hand 2        | Nose 2 | Thermi      |
| Foot 3        | Nose 2 | Bacteroid   |
| Dog Foot 1    | Hand 2 | Spiroch     |
| Dog Foot 2    | Hand 2 | Tenericutes |
| Dog Nose 2    | Hand 2 | Bacteroid   |
| Dog Nose 2    | Hand 2 | Tenericutes |
| Dog Nose 2    | Hand 2 | Thermi      |

|                    |        |             |
|--------------------|--------|-------------|
| Dog Foot 3         | Hand 2 | Firmicutes  |
| Dog Foot 3         | Hand 2 | Verruco     |
| Dog Nose 3         | Hand 2 | Crenarch    |
| Dog Nose 3         | Hand 2 | Cyanobact   |
| Dog Nose 3         | Hand 2 | Gemmatimon  |
| Foot 2             | Hand 2 | Acidobact   |
| Foot 2             | Hand 2 | Actinobact  |
| Foot 2             | Hand 2 | Cyanobact   |
| Foot 2             | Hand 2 | Gemmatimon  |
| Foot 2             | Hand 2 | Plancto     |
| Foot 2             | Hand 2 | Verruco     |
| Nose 2             | Hand 2 | Actinobact  |
| Foot 3             | Hand 2 | Acidobact   |
| Foot 3             | Hand 2 | Bacteroid   |
| Foot 3             | Hand 2 | Plancto     |
| Hand 3             | Hand 2 | SR1         |
| Nose 3             | Hand 2 | Spiroch     |
| Bathroom Door Knob | Hand 2 | Fusobact    |
| Bedroom Floor      | Hand 2 | Crenarch    |
| Front Door Knob    | Hand 2 | Proteobact  |
| Kitchen Counter    | Hand 2 | SR1         |
| Kitchen Floor      | Hand 2 | Firmicutes  |
| Kitchen Floor      | Hand 2 | Fusobact    |
| Kitchen Floor      | Hand 2 | Proteobact  |
| Kitchen Floor      | Hand 2 | Thermi      |
| Dog Foot 1         | Foot 2 | Verruco     |
| Dog Nose 1         | Foot 2 | Plancto     |
| Dog Nose 1         | Foot 2 | Proteobact  |
| Dog Foot 2         | Foot 2 | Proteobact  |
| Dog Nose 2         | Foot 2 | Crenarch    |
| Dog Nose 2         | Foot 2 | Firmicutes  |
| Dog Nose 2         | Foot 2 | SR1         |
| Dog Foot 3         | Foot 2 | Acidobact   |
| Dog Foot 3         | Foot 2 | Actinobact  |
| Dog Foot 3         | Foot 2 | Bacteroid   |
| Dog Foot 3         | Foot 2 | Fusobact    |
| Dog Nose 3         | Foot 2 | Bacteroid   |
| Foot 1             | Foot 2 | Gemmatimon  |
| Foot 1             | Foot 2 | Spiroch     |
| Hand 1             | Foot 2 | Cyanobact   |
| Hand 1             | Foot 2 | Tenericutes |
| Hand 2             | Foot 2 | Acidobact   |

|               |        |             |
|---------------|--------|-------------|
| Hand 2        | Foot 2 | Fusobact    |
| Hand 2        | Foot 2 | Spiroch     |
| Nose 2        | Foot 2 | Crenarch    |
| Nose 2        | Foot 2 | Plancto     |
| Hand 3        | Foot 2 | Tenericutes |
| Hand 3        | Foot 2 | Verruco     |
| Nose 3        | Foot 2 | Cyanobact   |
| Nose 3        | Foot 2 | Firmicutes  |
| Bedroom Floor | Foot 2 | Gemmatimon  |
| Bedroom Floor | Foot 2 | Thermi      |
| Kitchen Floor | Foot 2 | Actinobact  |
| Kitchen Floor | Foot 2 | Thermi      |
| Dog Foot 1    | Nose 1 | Spiroch     |
| Dog Foot 1    | Nose 1 | SR1         |
| Dog Nose 1    | Nose 1 | Acidobact   |
| Dog Foot 2    | Nose 1 | Actinobact  |
| Dog Foot 2    | Nose 1 | Fusobact    |
| Dog Nose 2    | Nose 1 | Firmicutes  |
| Dog Foot 3    | Nose 1 | Tenericutes |
| Foot 1        | Nose 1 | Actinobact  |
| Foot 1        | Nose 1 | Bacteroid   |
| Foot 1        | Nose 1 | Plancto     |
| Foot 1        | Nose 1 | Verruco     |
| Hand 1        | Nose 1 | Thermi      |
| Foot 2        | Nose 1 | Bacteroid   |
| Foot 2        | Nose 1 | Gemmatimon  |
| Foot 2        | Nose 1 | Thermi      |
| Hand 2        | Nose 1 | Cyanobact   |
| Nose 2        | Nose 1 | Fusobact    |
| Nose 2        | Nose 1 | Proteobact  |
| Nose 2        | Nose 1 | Verruco     |
| Foot 3        | Nose 1 | Gemmatimon  |
| Hand 3        | Nose 1 | Tenericutes |
| Nose 3        | Nose 1 | Crenarch    |
| Nose 3        | Nose 1 | Proteobact  |
| Nose 3        | Nose 1 | SR1         |
| Dog Foot 1    | Hand 1 | Crenarch    |
| Dog Foot 1    | Hand 1 | Fusobact    |
| Dog Nose 2    | Hand 1 | Spiroch     |
| Dog Foot 3    | Hand 1 | Tenericutes |
| Dog Nose 3    | Hand 1 | Actinobact  |
| Dog Nose 3    | Hand 1 | Plancto     |

|                      |        |             |
|----------------------|--------|-------------|
| Foot 1               | Hand 1 | Crenarch    |
| Nose 1               | Hand 1 | Spiroch     |
| Hand 2               | Hand 1 | Acidobact   |
| Hand 2               | Hand 1 | Firmicutes  |
| Hand 2               | Hand 1 | Gemmatimon  |
| Hand 2               | Hand 1 | SR1         |
| Hand 2               | Hand 1 | Tenericutes |
| Hand 2               | Hand 1 | Thermi      |
| Nose 2               | Hand 1 | Verruco     |
| Foot 3               | Hand 1 | Actinobact  |
| Nose 3               | Hand 1 | Bacteroid   |
| Nose 3               | Hand 1 | Cyanobact   |
| Nose 3               | Hand 1 | Fusobact    |
| Nose 3               | Hand 1 | Plancto     |
| Bedroom Floor        | Hand 1 | Bacteroid   |
| Bedroom Floor        | Hand 1 | Cyanobact   |
| Front Door Knob      | Hand 1 | Gemmatimon  |
| Front Door Knob      | Hand 1 | Proteobact  |
| Kitchen Counter      | Hand 1 | SR1         |
| Kitchen Floor        | Hand 1 | Thermi      |
| Kitchen Light Switch | Hand 1 | Acidobact   |
| Dog Foot 1           | Foot 1 | Tenericutes |
| Dog Foot 1           | Foot 1 | Verruco     |
| Dog Nose 1           | Foot 1 | Bacteroid   |
| Dog Nose 1           | Foot 1 | SR1         |
| Dog Foot 2           | Foot 1 | Gemmatimon  |
| Dog Nose 2           | Foot 1 | Firmicutes  |
| Dog Foot 3           | Foot 1 | Acidobact   |
| Dog Foot 3           | Foot 1 | Crenarch    |
| Dog Foot 3           | Foot 1 | Cyanobact   |
| Dog Foot 3           | Foot 1 | Spiroch     |
| Dog Nose 3           | Foot 1 | Spiroch     |
| Nose 1               | Foot 1 | Crenarch    |
| Nose 1               | Foot 1 | Tenericutes |
| Foot 2               | Foot 1 | Actinobact  |
| Foot 2               | Foot 1 | Cyanobact   |
| Hand 2               | Foot 1 | Bacteroid   |
| Nose 2               | Foot 1 | Firmicutes  |
| Foot 3               | Foot 1 | Acidobact   |
| Foot 3               | Foot 1 | Proteobact  |
| Foot 3               | Foot 1 | Thermi      |
| Hand 3               | Foot 1 | Plancto     |

|               |            |             |
|---------------|------------|-------------|
| Nose 3        | Foot 1     | Plancto     |
| Bedroom Floor | Foot 1     | Fusobact    |
| Bedroom Floor | Foot 1     | Thermi      |
| Kitchen Floor | Foot 1     | Actinobact  |
| Kitchen Floor | Foot 1     | Fusobact    |
| Kitchen Floor | Foot 1     | Gemmatimon  |
| Kitchen Floor | Foot 1     | Proteobact  |
| Kitchen Floor | Foot 1     | SR1         |
| Kitchen Floor | Foot 1     | Verruco     |
| Dog Foot 1    | Dog Nose 3 | Cyanobact   |
| Dog Nose 1    | Dog Nose 3 | Cyanobact   |
| Dog Foot 2    | Dog Nose 3 | Crenarch    |
| Dog Foot 2    | Dog Nose 3 | Tenericutes |
| Dog Nose 2    | Dog Nose 3 | Actinobact  |
| Dog Nose 2    | Dog Nose 3 | Thermi      |
| Dog Foot 3    | Dog Nose 3 | SR1         |
| Dog Foot 3    | Dog Nose 3 | Tenericutes |
| Foot 1        | Dog Nose 3 | Proteobact  |
| Foot 1        | Dog Nose 3 | Spiroch     |
| Nose 1        | Dog Nose 3 | Proteobact  |
| Nose 1        | Dog Nose 3 | Verruco     |
| Foot 2        | Dog Nose 3 | Firmicutes  |
| Foot 2        | Dog Nose 3 | Fusobact    |
| Nose 2        | Dog Nose 3 | Acidobact   |
| Nose 2        | Dog Nose 3 | Actinobact  |
| Nose 2        | Dog Nose 3 | Fusobact    |
| Nose 2        | Dog Nose 3 | Gemmatimon  |
| Foot 3        | Dog Nose 3 | Bacteroid   |
| Hand 3        | Dog Nose 3 | Firmicutes  |
| Nose 3        | Dog Nose 3 | Crenarch    |
| Nose 3        | Dog Nose 3 | Plancto     |
| Nose 3        | Dog Nose 3 | SR1         |
| Bedroom Floor | Dog Nose 3 | Bacteroid   |
| Bedroom Floor | Dog Nose 3 | Verruco     |
| Kitchen Floor | Dog Nose 3 | Acidobact   |
| Kitchen Floor | Dog Nose 3 | Gemmatimon  |
| Kitchen Floor | Dog Nose 3 | Spiroch     |
| Dog Foot 1    | Dog Foot 3 | Gemmatimon  |
| Dog Foot 1    | Dog Foot 3 | Plancto     |
| Dog Foot 1    | Dog Foot 3 | Spiroch     |
| Dog Foot 1    | Dog Foot 3 | Thermi      |
| Dog Foot 2    | Dog Foot 3 | Crenarch    |

|               |            |             |
|---------------|------------|-------------|
| Dog Foot 2    | Dog Foot 3 | SR1         |
| Dog Foot 2    | Dog Foot 3 | Tenericutes |
| Dog Nose 2    | Dog Foot 3 | Acidobact   |
| Dog Nose 2    | Dog Foot 3 | Firmicutes  |
| Hand 1        | Dog Foot 3 | Acidobact   |
| Hand 1        | Dog Foot 3 | Fusobact    |
| Hand 2        | Dog Foot 3 | Gemmatimon  |
| Hand 2        | Dog Foot 3 | Plancto     |
| Hand 2        | Dog Foot 3 | Thermi      |
| Nose 2        | Dog Foot 3 | Actinobact  |
| Nose 2        | Dog Foot 3 | Bacteroid   |
| Nose 2        | Dog Foot 3 | Cyanobact   |
| Nose 2        | Dog Foot 3 | Proteobact  |
| Nose 2        | Dog Foot 3 | SR1         |
| Foot 3        | Dog Foot 3 | Crenarch    |
| Foot 3        | Dog Foot 3 | Verruco     |
| Hand 3        | Dog Foot 3 | Fusobact    |
| Hand 3        | Dog Foot 3 | Verruco     |
| Nose 3        | Dog Foot 3 | Cyanobact   |
| Bedroom Floor | Dog Foot 3 | Spiroch     |
| Kitchen Floor | Dog Foot 3 | Tenericutes |
| Dog Foot 1    | Dog Nose 2 | Firmicutes  |
| Dog Foot 1    | Dog Nose 2 | Gemmatimon  |
| Dog Foot 1    | Dog Nose 2 | Proteobact  |
| Dog Nose 1    | Dog Nose 2 | Crenarch    |
| Dog Nose 1    | Dog Nose 2 | Proteobact  |
| Dog Foot 2    | Dog Nose 2 | Crenarch    |
| Dog Foot 2    | Dog Nose 2 | Fusobact    |
| Dog Foot 2    | Dog Nose 2 | Tenericutes |
| Dog Foot 3    | Dog Nose 2 | Actinobact  |
| Dog Nose 3    | Dog Nose 2 | Bacteroid   |
| Dog Nose 3    | Dog Nose 2 | Firmicutes  |
| Dog Nose 3    | Dog Nose 2 | Plancto     |
| Foot 1        | Dog Nose 2 | Bacteroid   |
| Hand 1        | Dog Nose 2 | Spiroch     |
| Nose 1        | Dog Nose 2 | Fusobact    |
| Nose 1        | Dog Nose 2 | SR1         |
| Foot 2        | Dog Nose 2 | SR1         |
| Hand 2        | Dog Nose 2 | Tenericutes |
| Nose 2        | Dog Nose 2 | Actinobact  |
| Foot 3        | Dog Nose 2 | Plancto     |
| Foot 3        | Dog Nose 2 | Spiroch     |



|               |            |             |
|---------------|------------|-------------|
| Kitchen Floor | Dog Nose 2 | Acidobact   |
| Dog Foot 1    | Dog Foot 2 | Gemmatimon  |
| Dog Foot 1    | Dog Foot 2 | Tenericutes |
| Dog Foot 1    | Dog Foot 2 | Verruco     |
| Dog Nose 2    | Dog Foot 2 | Firmicutes  |
| Dog Nose 2    | Dog Foot 2 | Thermi      |
| Dog Nose 3    | Dog Foot 2 | Bacteroid   |
| Dog Nose 3    | Dog Foot 2 | Proteobact  |
| Nose 1        | Dog Foot 2 | Actinobact  |
| Foot 2        | Dog Foot 2 | Crenarch    |
| Hand 2        | Dog Foot 2 | Acidobact   |
| Hand 2        | Dog Foot 2 | Gemmatimon  |
| Hand 2        | Dog Foot 2 | Spiroch     |
| Hand 2        | Dog Foot 2 | SR1         |
| Hand 2        | Dog Foot 2 | Tenericutes |
| Nose 2        | Dog Foot 2 | Cyanobact   |
| Nose 2        | Dog Foot 2 | Spiroch     |
| Foot 3        | Dog Foot 2 | Thermi      |
| Hand 3        | Dog Foot 2 | Acidobact   |
| Hand 3        | Dog Foot 2 | Actinobact  |
| Nose 3        | Dog Foot 2 | Bacteroid   |
| Bedroom Floor | Dog Foot 2 | Crenarch    |
| Bedroom Floor | Dog Foot 2 | Firmicutes  |
| Bedroom Floor | Dog Foot 2 | Fusobact    |
| Bedroom Floor | Dog Foot 2 | Plancto     |
| Bedroom Floor | Dog Foot 2 | Proteobact  |
| Bedroom Floor | Dog Foot 2 | Verruco     |
| Kitchen Floor | Dog Foot 2 | Cyanobact   |
| Kitchen Floor | Dog Foot 2 | Fusobact    |
| Kitchen Floor | Dog Foot 2 | SR1         |
| Dog Foot 1    | Dog Nose 1 | Actinobact  |
| Dog Foot 1    | Dog Nose 1 | Proteobact  |
| Dog Foot 1    | Dog Nose 1 | Spiroch     |
| Dog Foot 2    | Dog Nose 1 | Cyanobact   |
| Dog Nose 2    | Dog Nose 1 | Gemmatimon  |
| Dog Nose 2    | Dog Nose 1 | SR1         |
| Dog Nose 3    | Dog Nose 1 | Verruco     |
| Foot 1        | Dog Nose 1 | Acidobact   |
| Foot 1        | Dog Nose 1 | Tenericutes |
| Hand 1        | Dog Nose 1 | Firmicutes  |
| Nose 1        | Dog Nose 1 | Fusobact    |
| Nose 1        | Dog Nose 1 | Verruco     |

|               |            |             |
|---------------|------------|-------------|
| Foot 2        | Dog Nose 1 | Bacteroid   |
| Foot 2        | Dog Nose 1 | Crenarch    |
| Hand 2        | Dog Nose 1 | Firmicutes  |
| Hand 2        | Dog Nose 1 | Thermi      |
| Nose 2        | Dog Nose 1 | Acidobact   |
| Nose 2        | Dog Nose 1 | Crenarch    |
| Foot 3        | Dog Nose 1 | Cyanobact   |
| Hand 3        | Dog Nose 1 | Thermi      |
| Nose 3        | Dog Nose 1 | Gemmatimon  |
| Nose 3        | Dog Nose 1 | Plancto     |
| Nose 3        | Dog Nose 1 | Proteobact  |
| Nose 3        | Dog Nose 1 | Spiroch     |
| Bedroom Floor | Dog Nose 1 | Actinobact  |
| Bedroom Floor | Dog Nose 1 | Plancto     |
| Bedroom Floor | Dog Nose 1 | Tenericutes |
| Kitchen Floor | Dog Nose 1 | Fusobact    |
| Dog Foot 2    | Dog Foot 1 | Proteobact  |
| Dog Foot 2    | Dog Foot 1 | Spiroch     |
| Dog Nose 2    | Dog Foot 1 | Actinobact  |
| Dog Nose 2    | Dog Foot 1 | Fusobact    |
| Dog Foot 3    | Dog Foot 1 | SR1         |
| Dog Nose 3    | Dog Foot 1 | Bacteroid   |
| Dog Nose 3    | Dog Foot 1 | Thermi      |
| Hand 1        | Dog Foot 1 | Acidobact   |
| Hand 1        | Dog Foot 1 | Cyanobact   |
| Hand 1        | Dog Foot 1 | Tenericutes |
| Hand 1        | Dog Foot 1 | Verruco     |
| Nose 1        | Dog Foot 1 | Bacteroid   |
| Nose 1        | Dog Foot 1 | Plancto     |
| Nose 1        | Dog Foot 1 | Proteobact  |
| Foot 2        | Dog Foot 1 | Spiroch     |
| Foot 2        | Dog Foot 1 | Thermi      |
| Hand 2        | Dog Foot 1 | Actinobact  |
| Hand 2        | Dog Foot 1 | Firmicutes  |
| Hand 2        | Dog Foot 1 | Fusobact    |
| Hand 2        | Dog Foot 1 | Gemmatimon  |
| Nose 2        | Dog Foot 1 | Verruco     |
| Foot 3        | Dog Foot 1 | Crenarch    |
| Foot 3        | Dog Foot 1 | SR1         |
| Hand 3        | Dog Foot 1 | Crenarch    |
| Hand 3        | Dog Foot 1 | Cyanobact   |
| Bedroom Floor | Dog Foot 1 | Acidobact   |

Bedroom Floor  
Kitchen Floor  
Kitchen Floor

Dog Foot 1  
Dog Foot 1  
Dog Foot 1

Firmicutes  
Gemmatimon  
Plancto
