# Supplementary material
Source: PubMed Central journal article supplement (PMC4337996)

**A**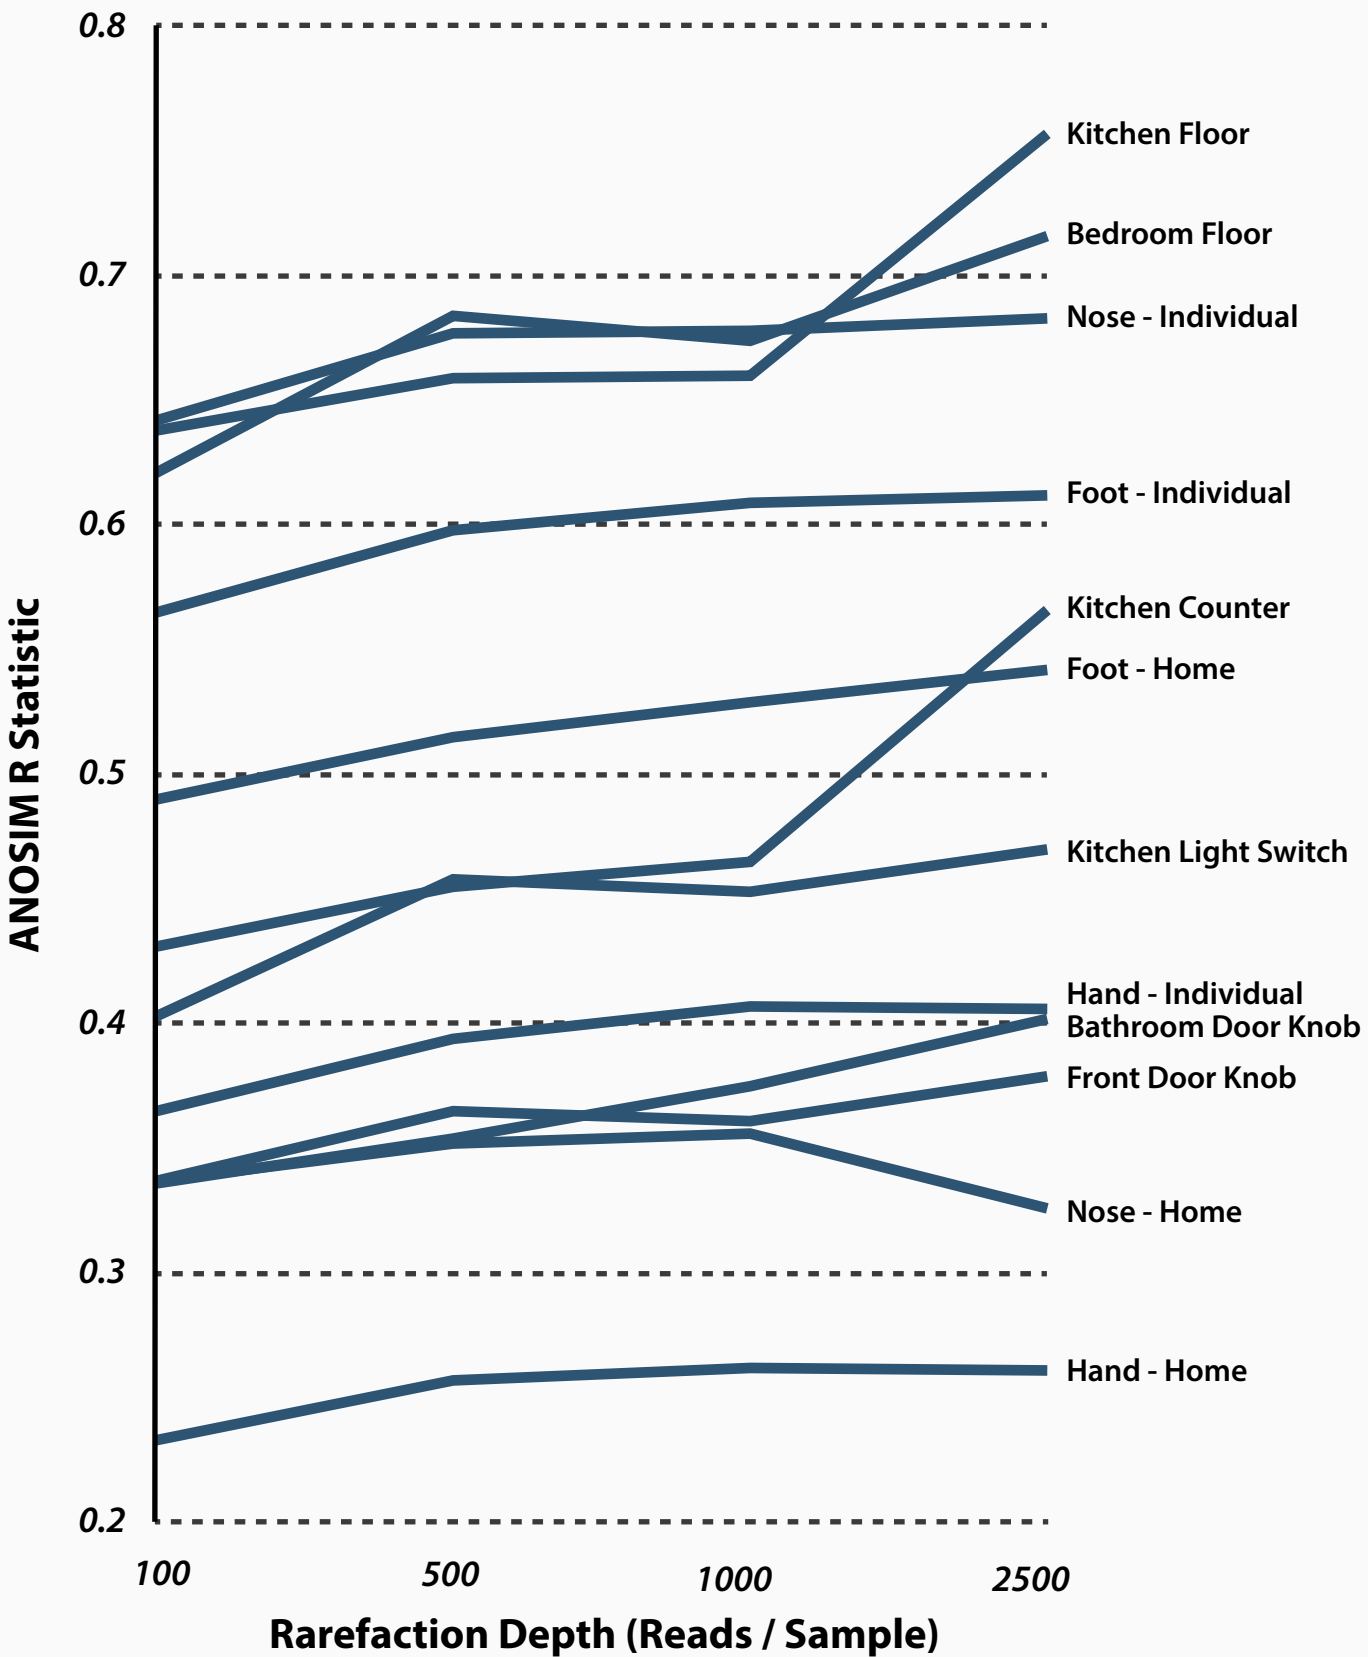**B**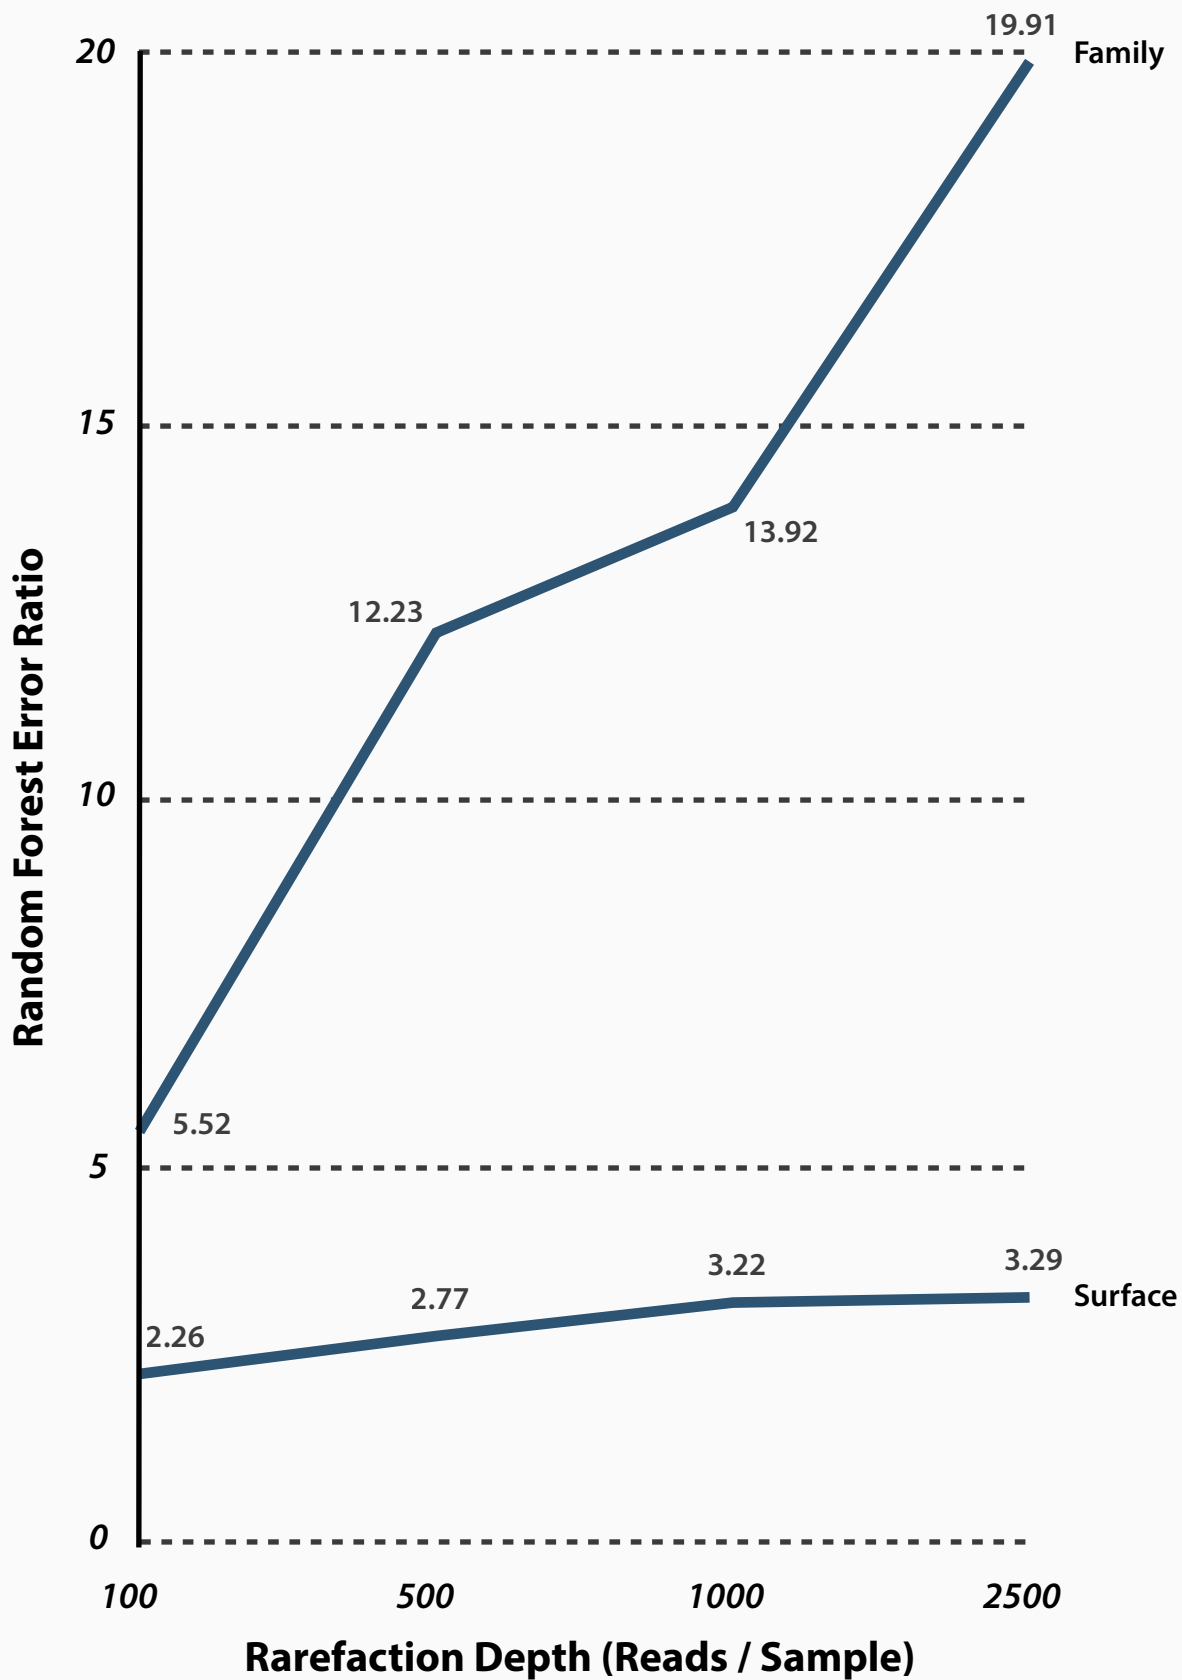

Supplement: NIHMS663075-supplement-Figure_S1.pdf [file NIHMS663075-supplement-Figure_S1.pdf]

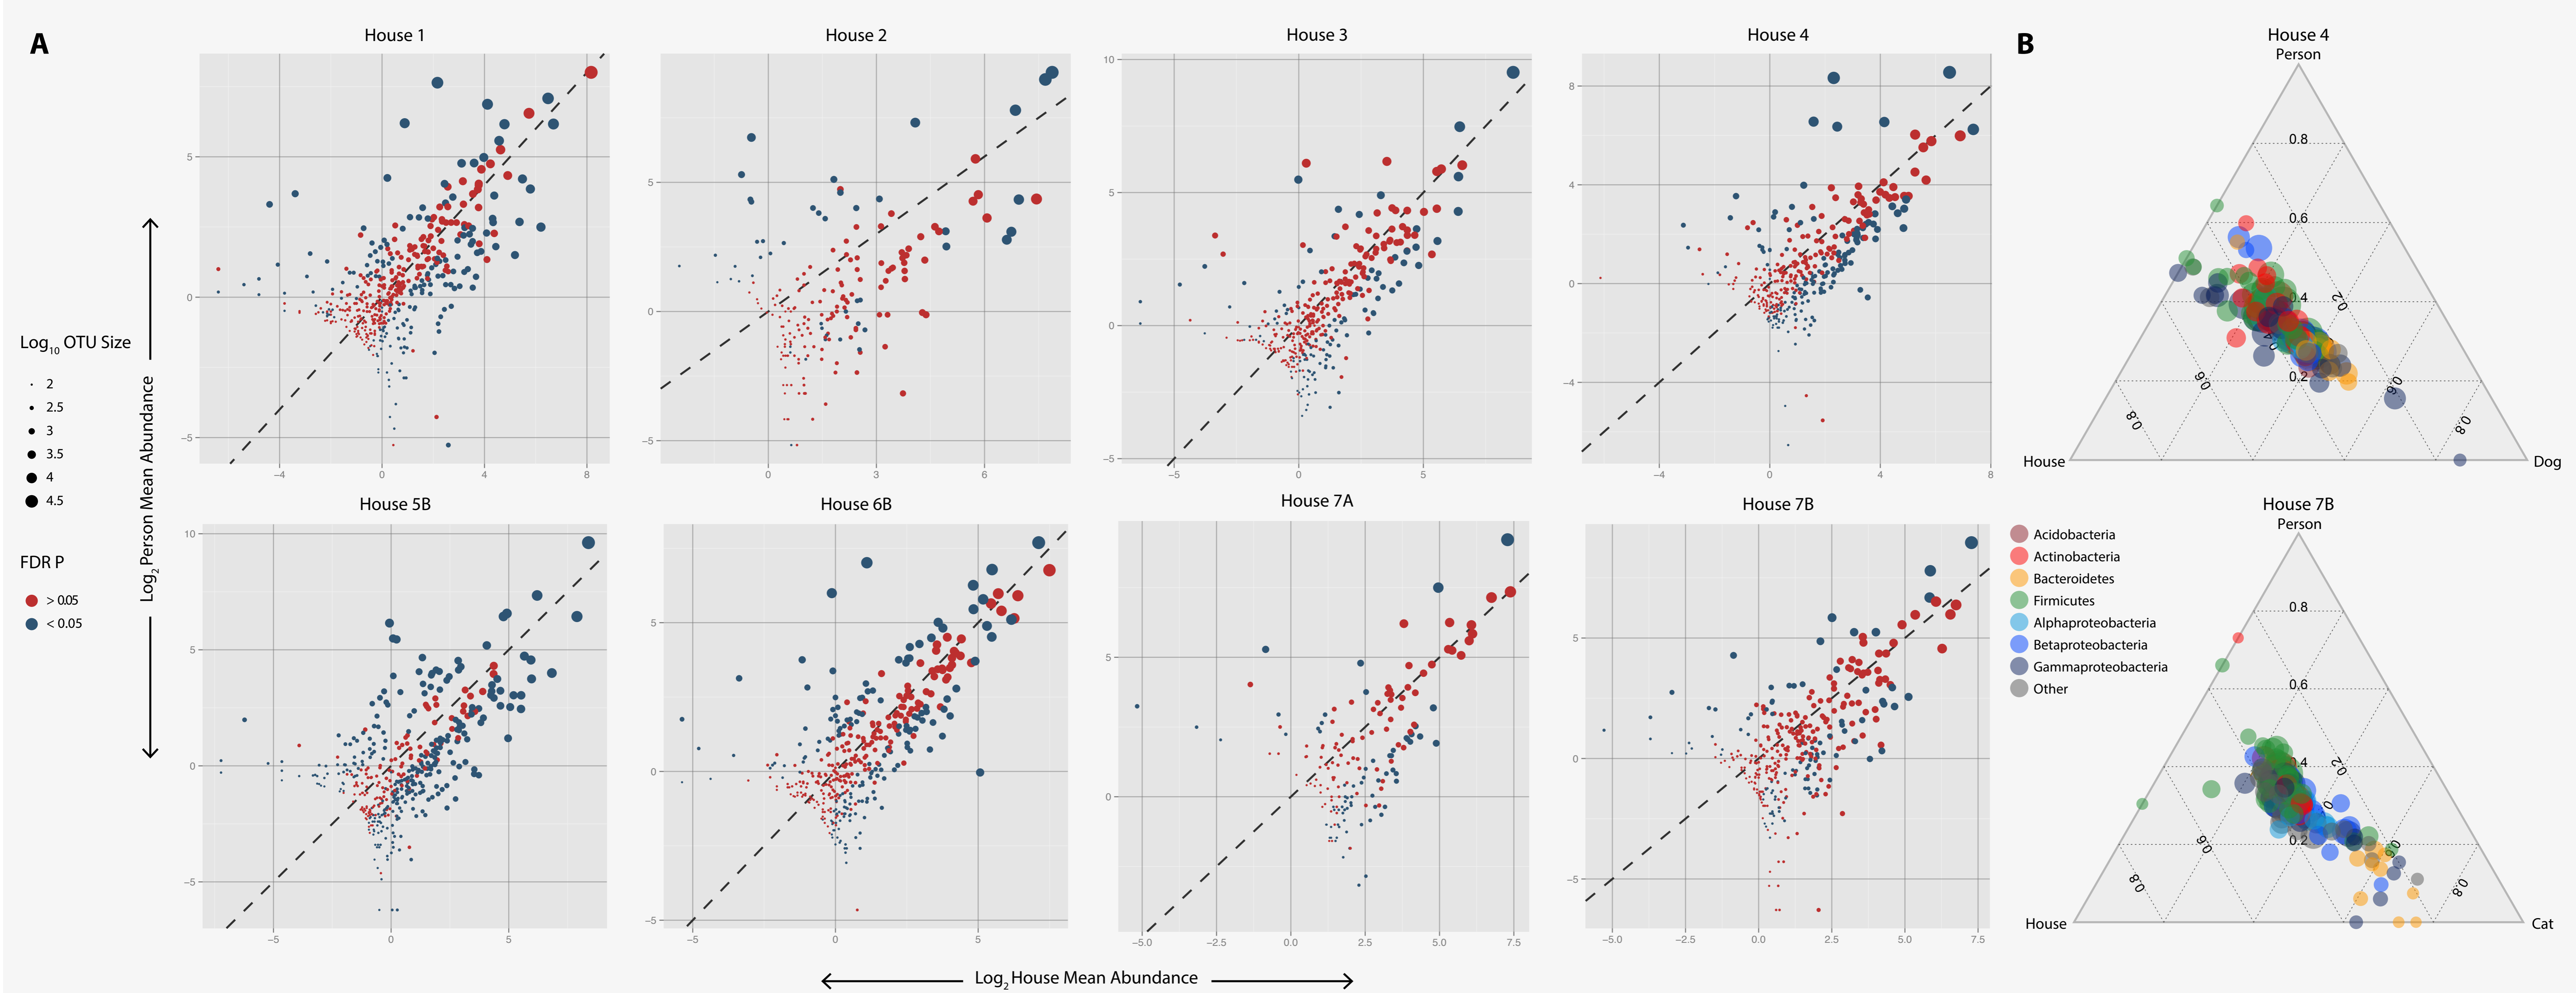

Supplement: NIHMS663075-supplement-Figure_S2.pdf [file NIHMS663075-supplement-Figure_S2.pdf]

**A**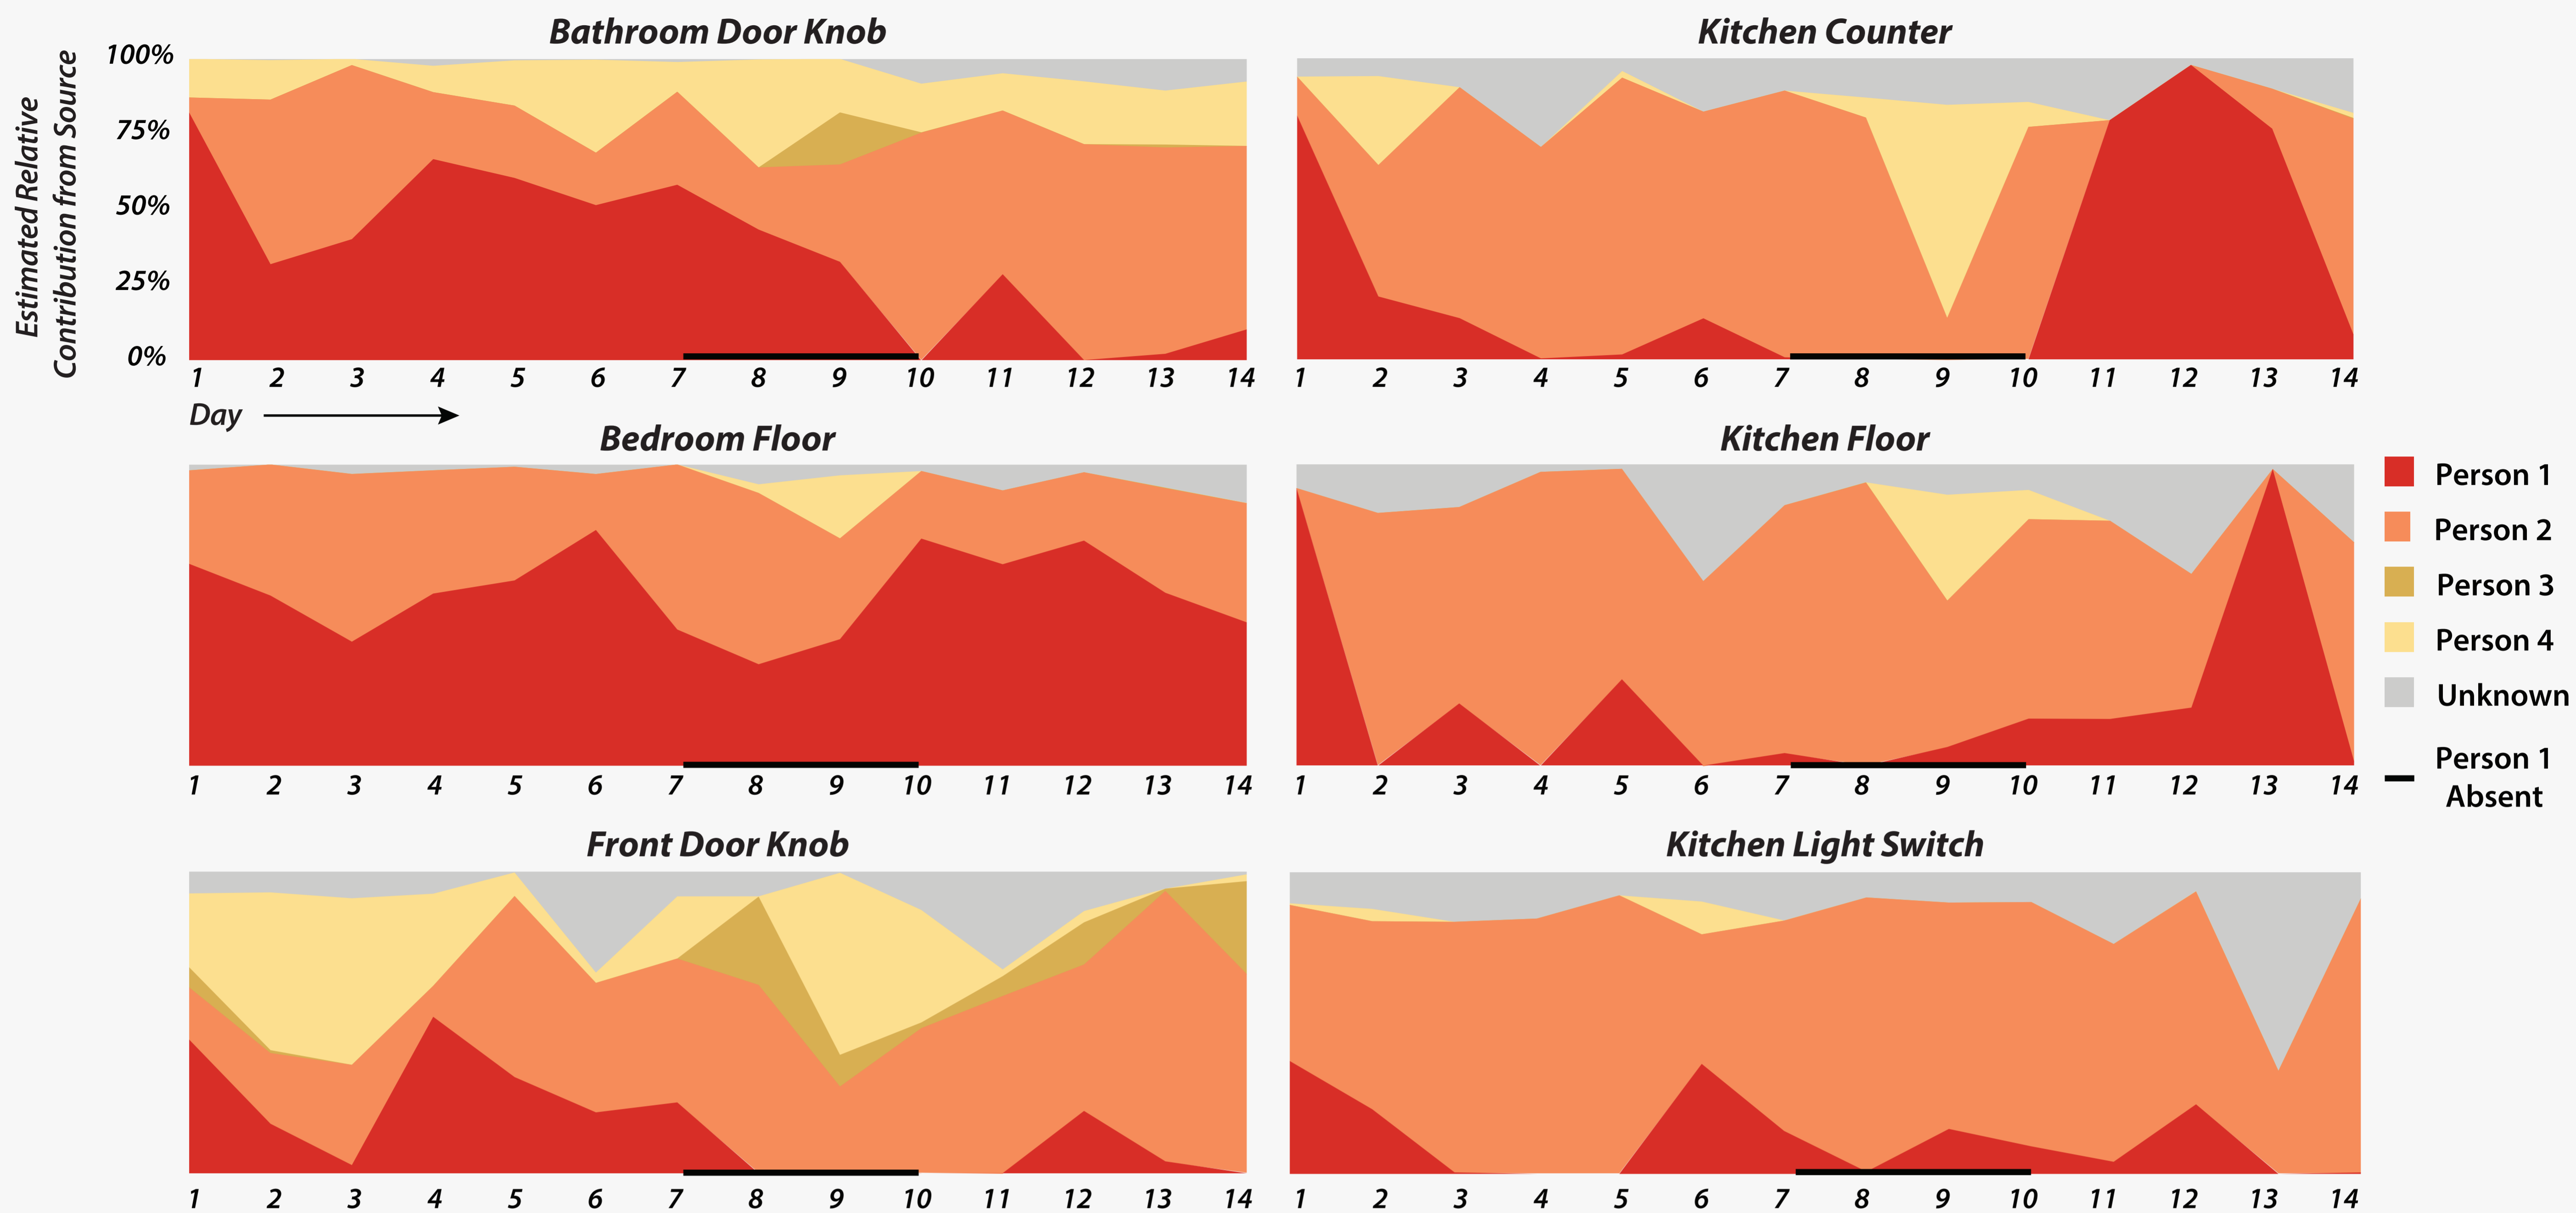**B**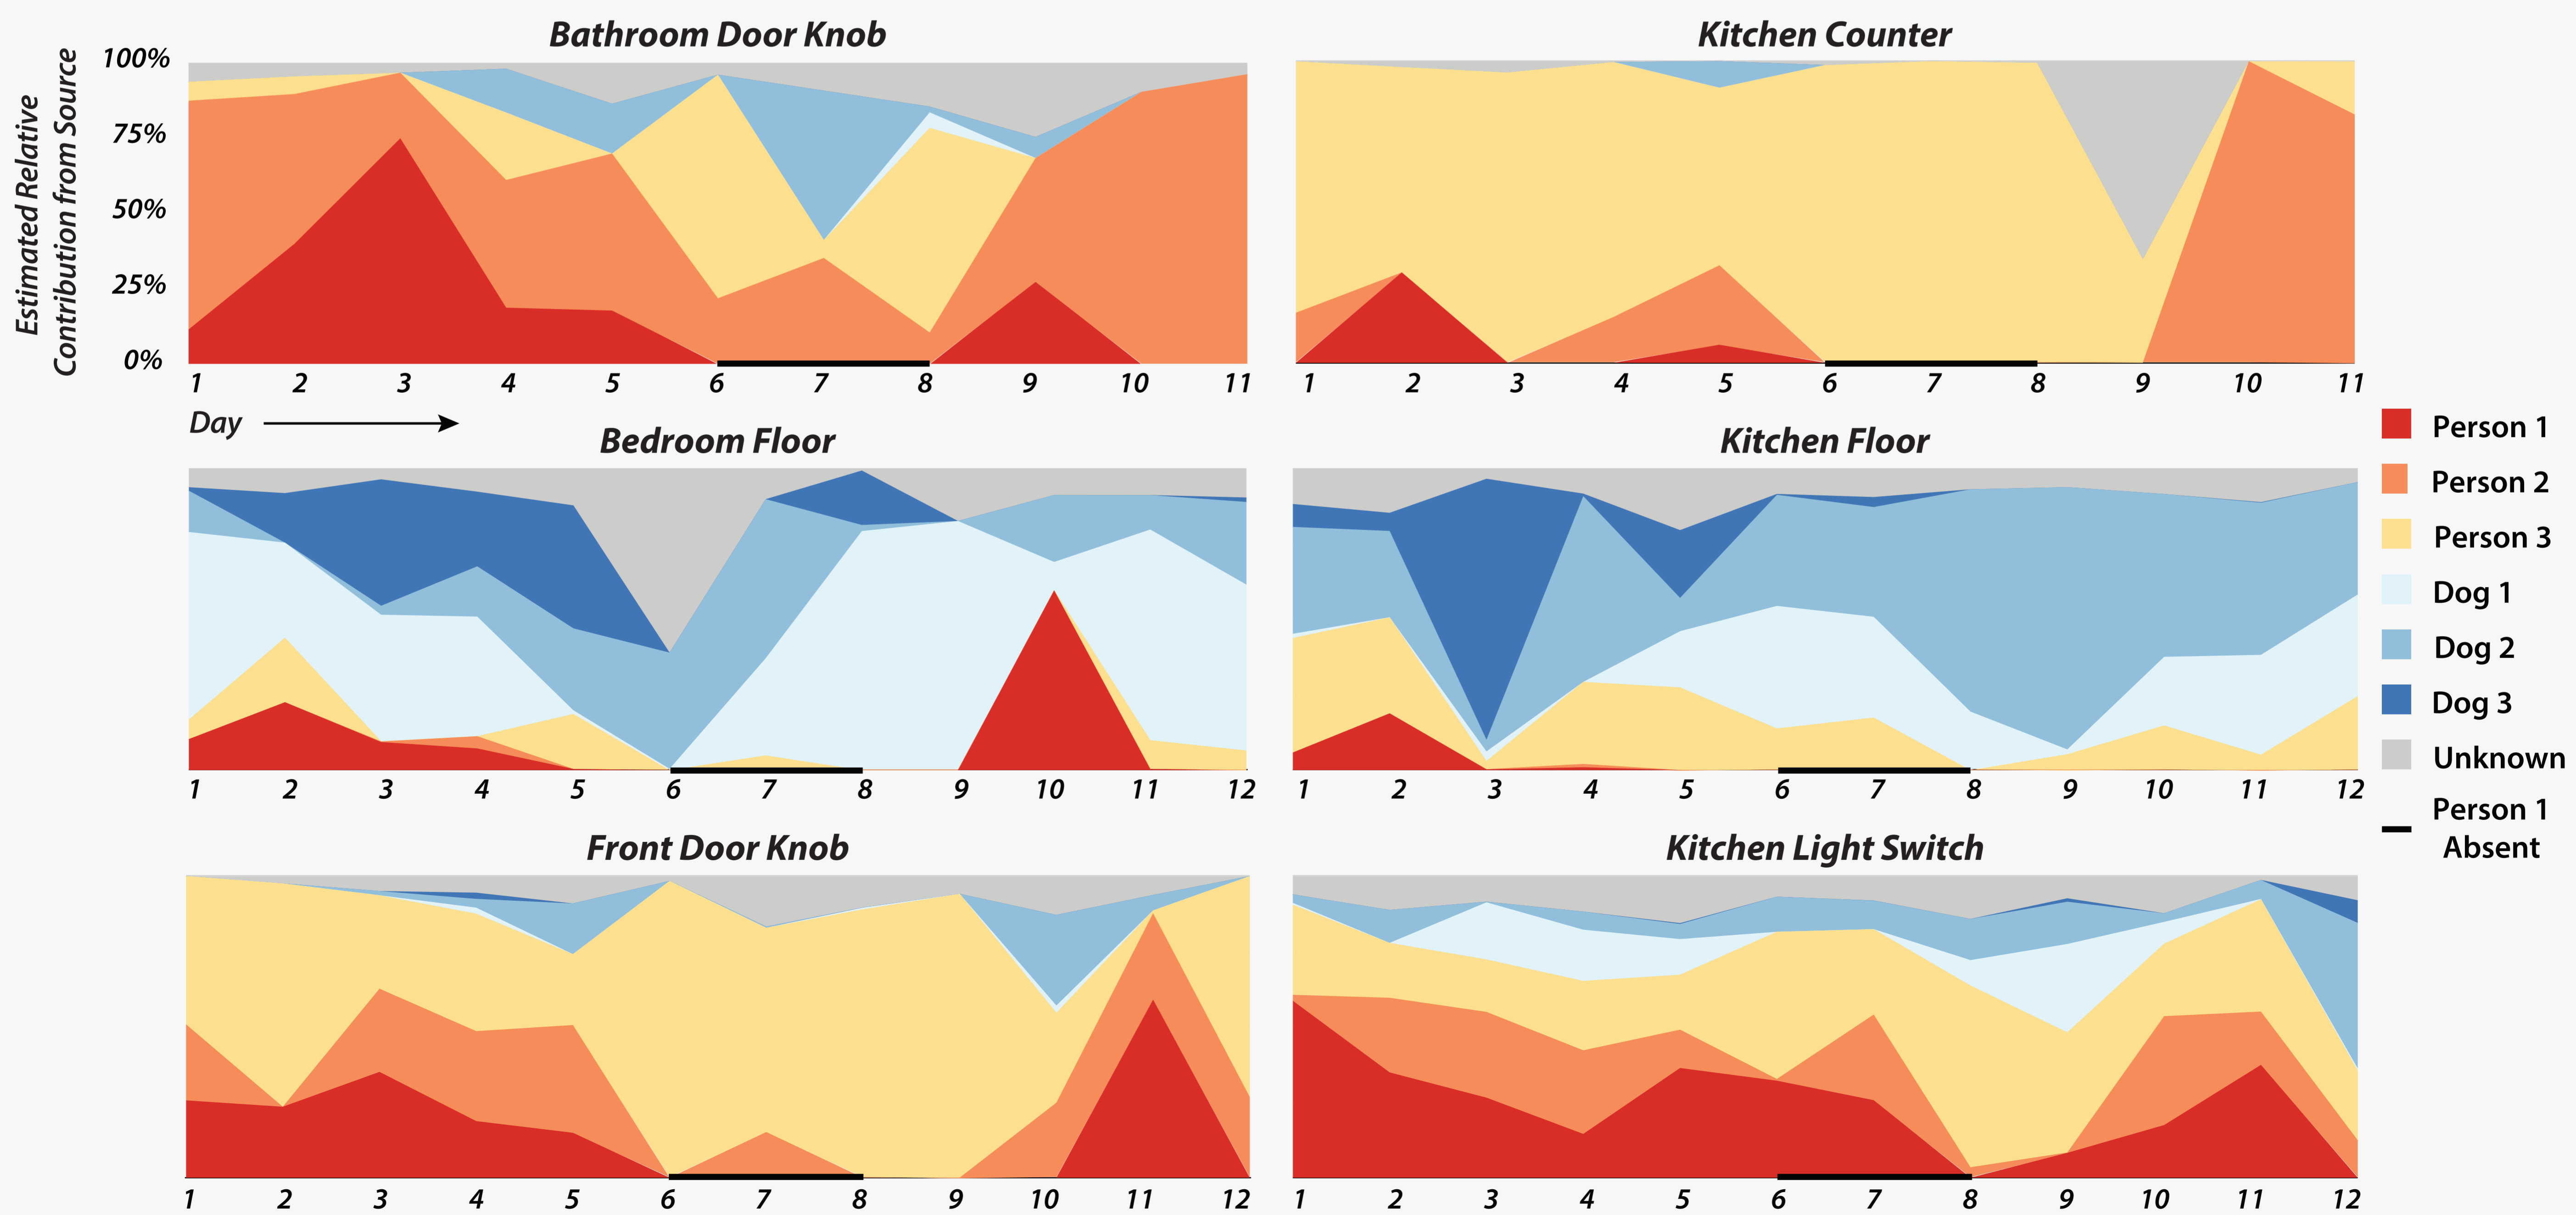

Supplement: NIHMS663075-supplement-Figure_S4.pdf [file NIHMS663075-supplement-Figure_S4.pdf]

House 1

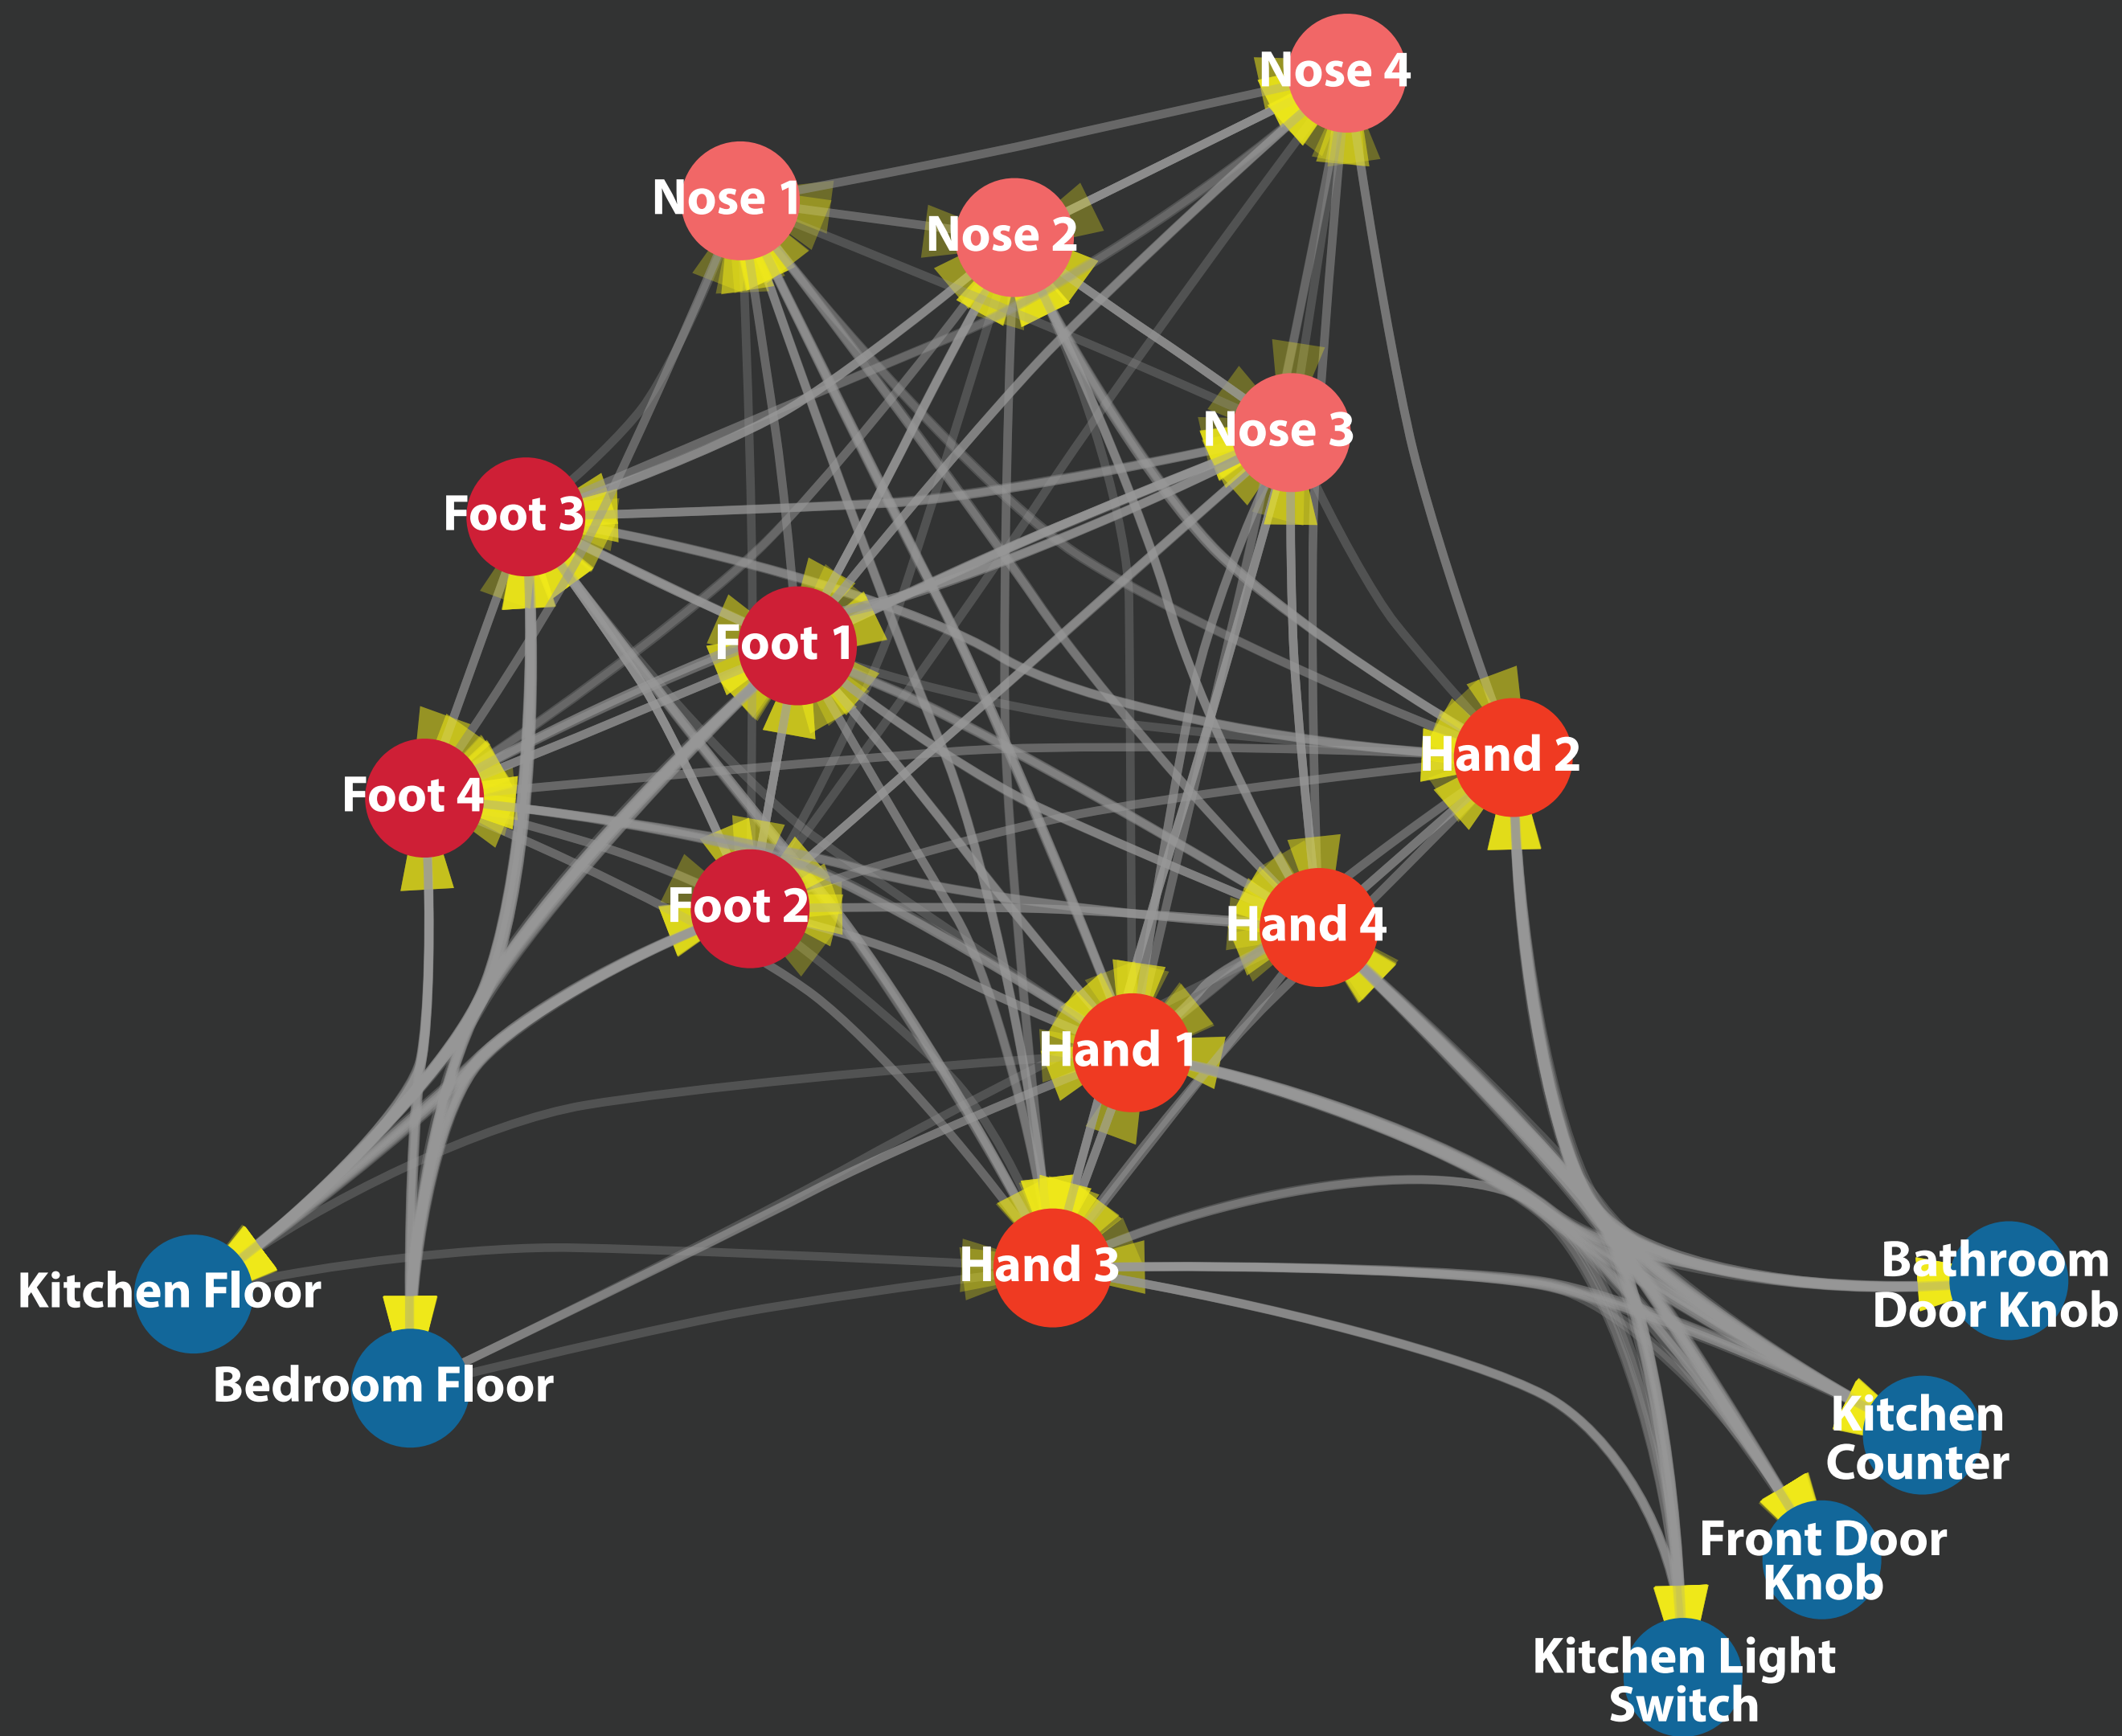

House 2

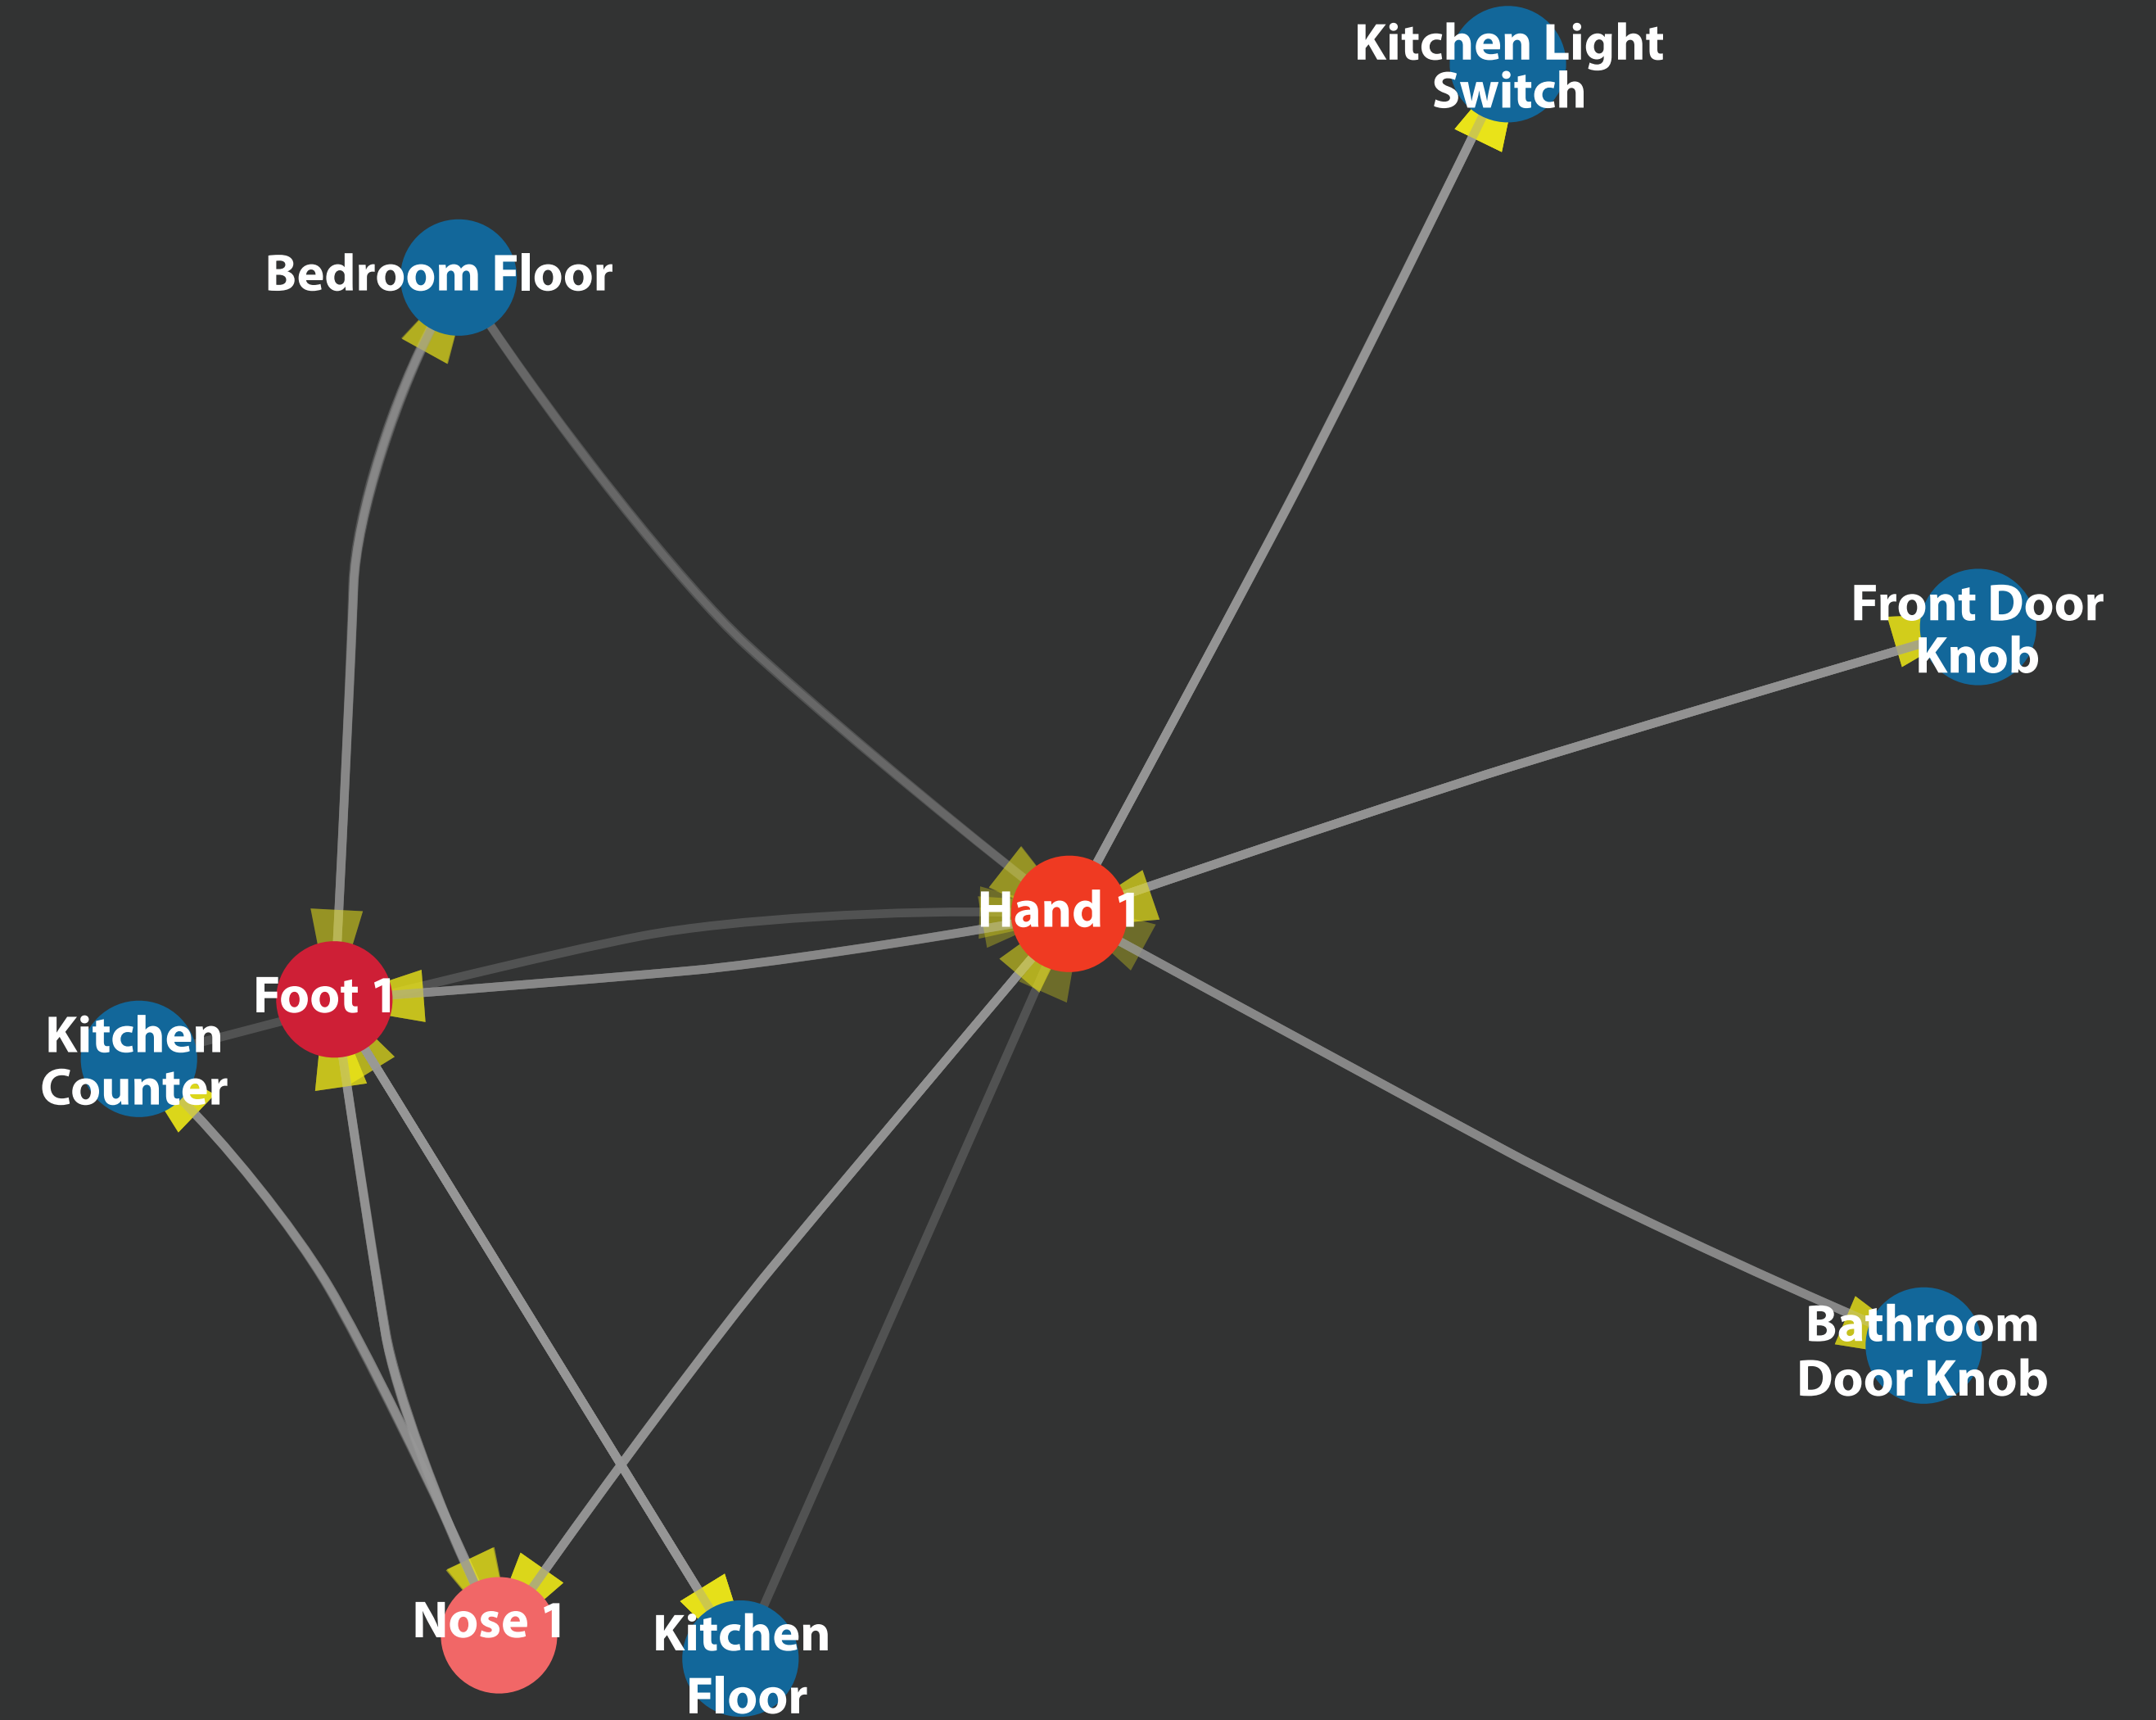

House 3

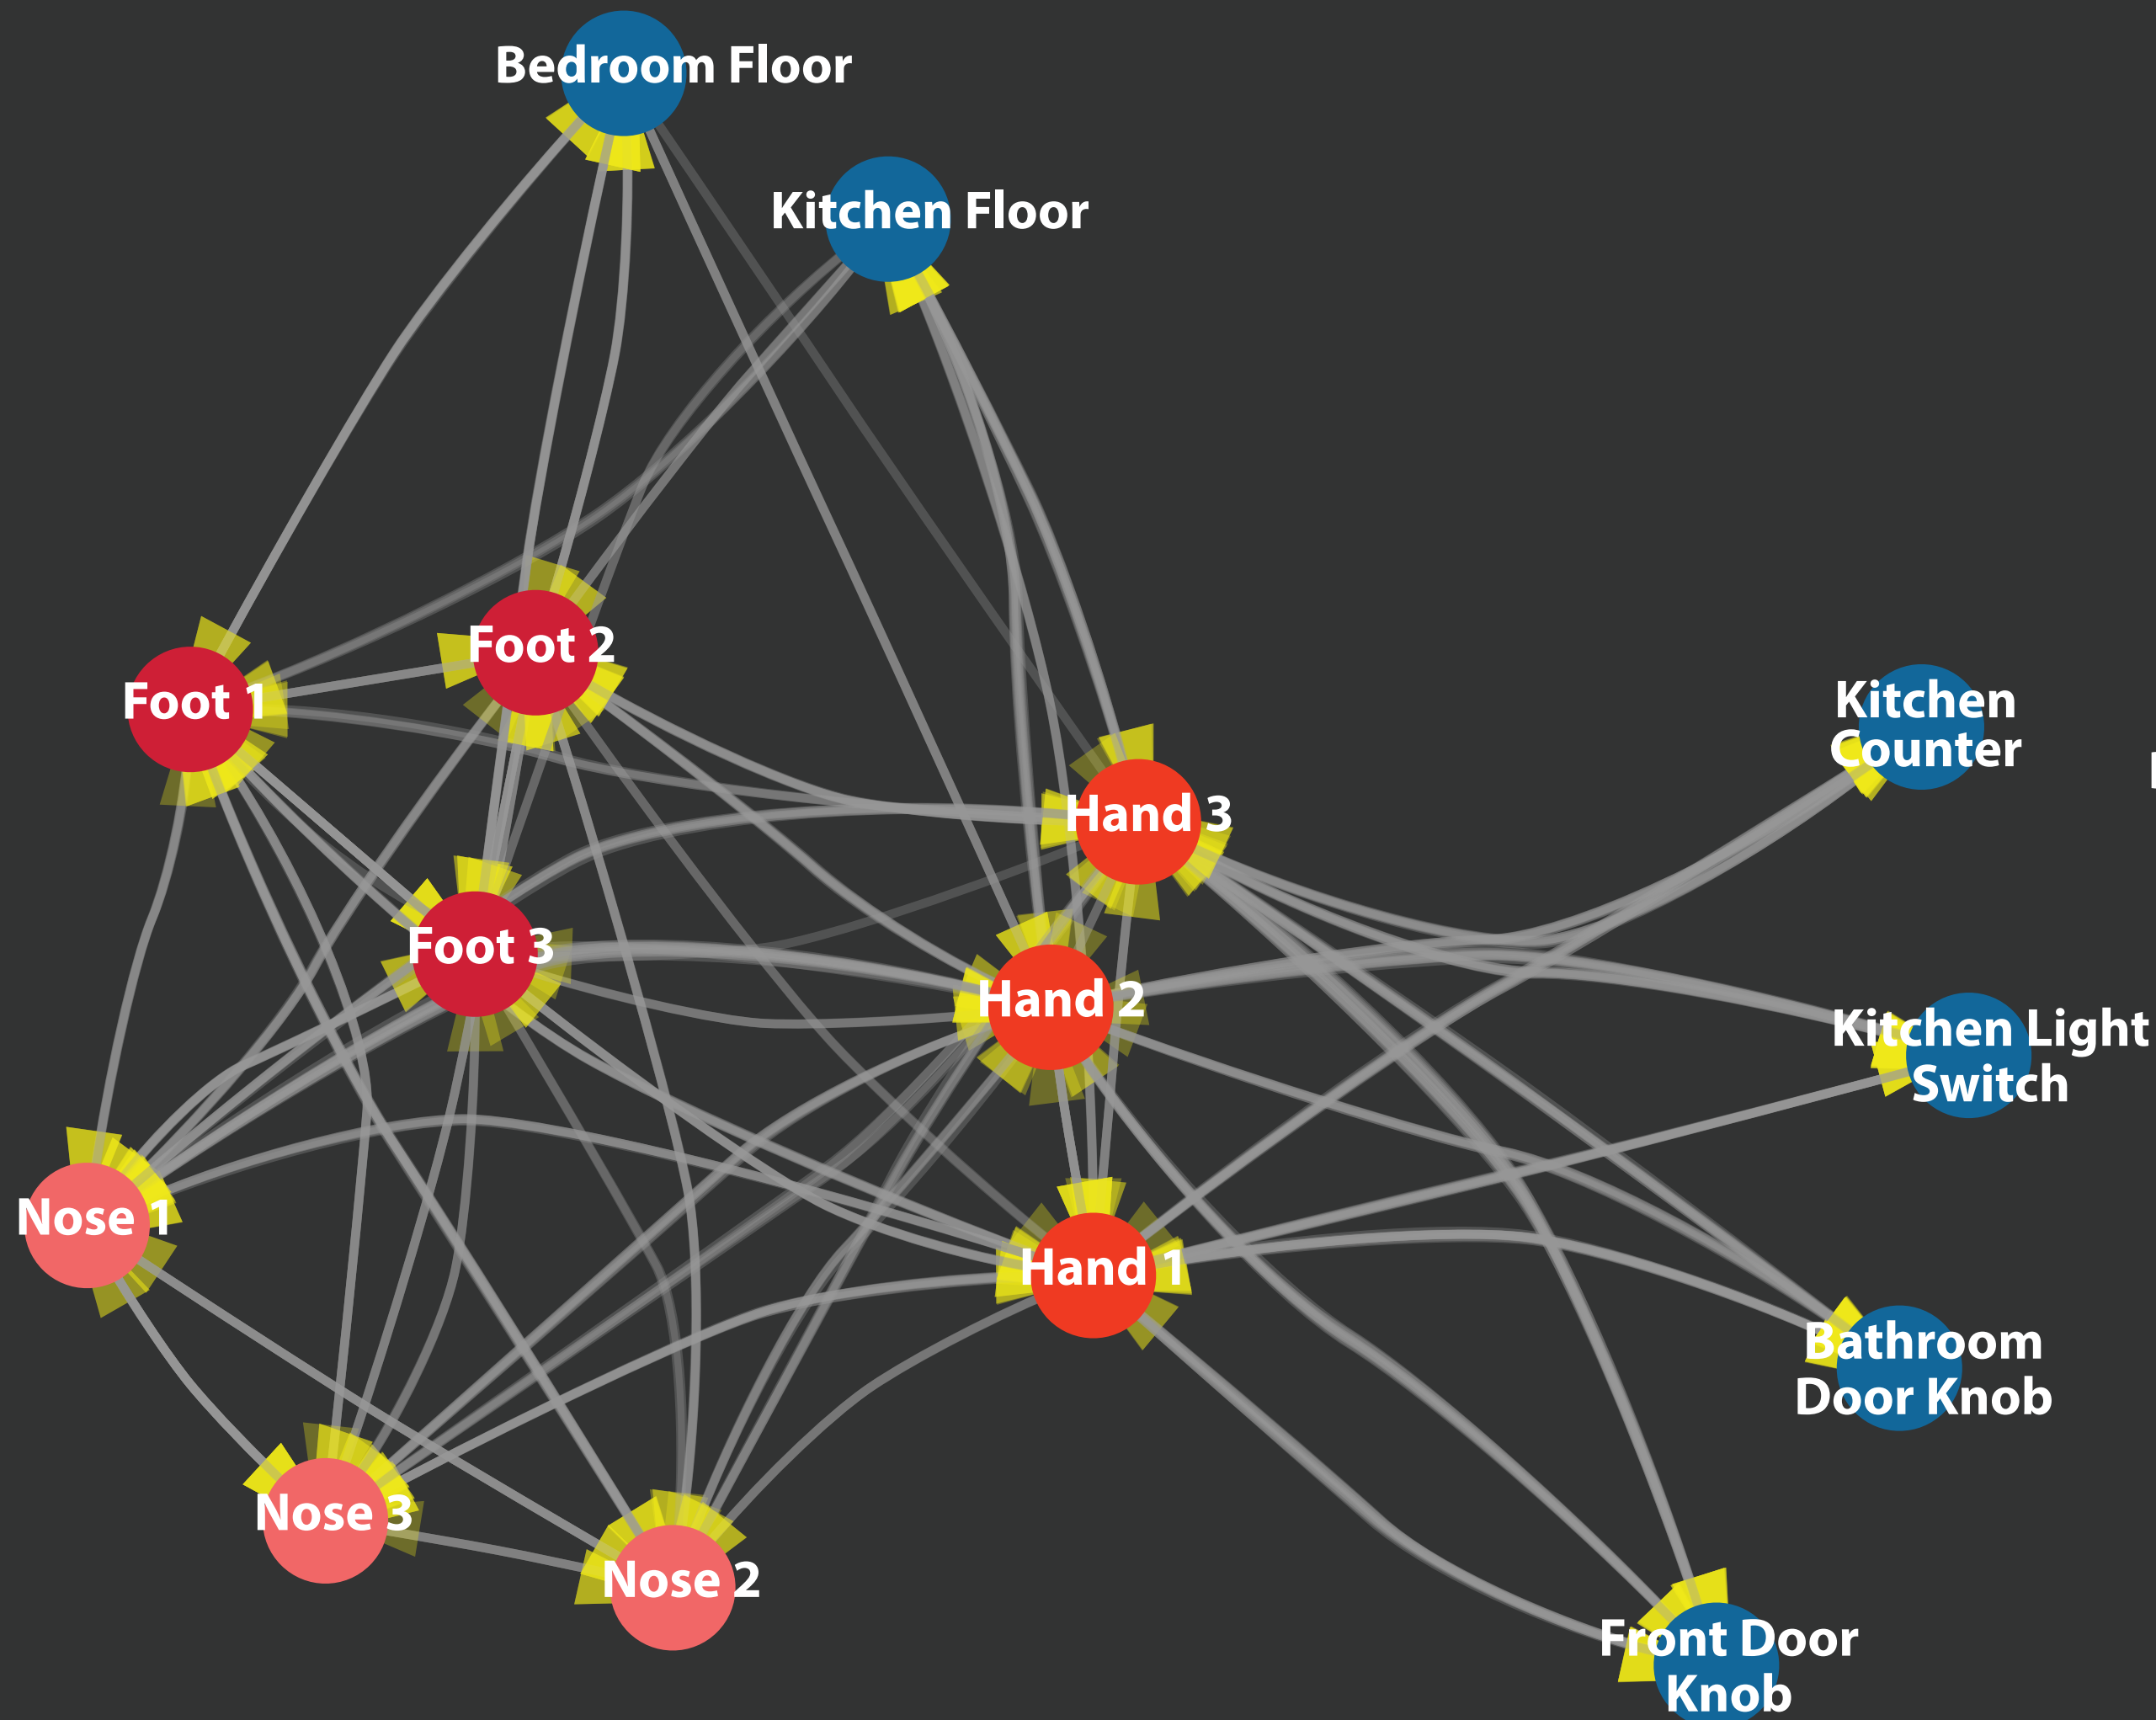

House 4

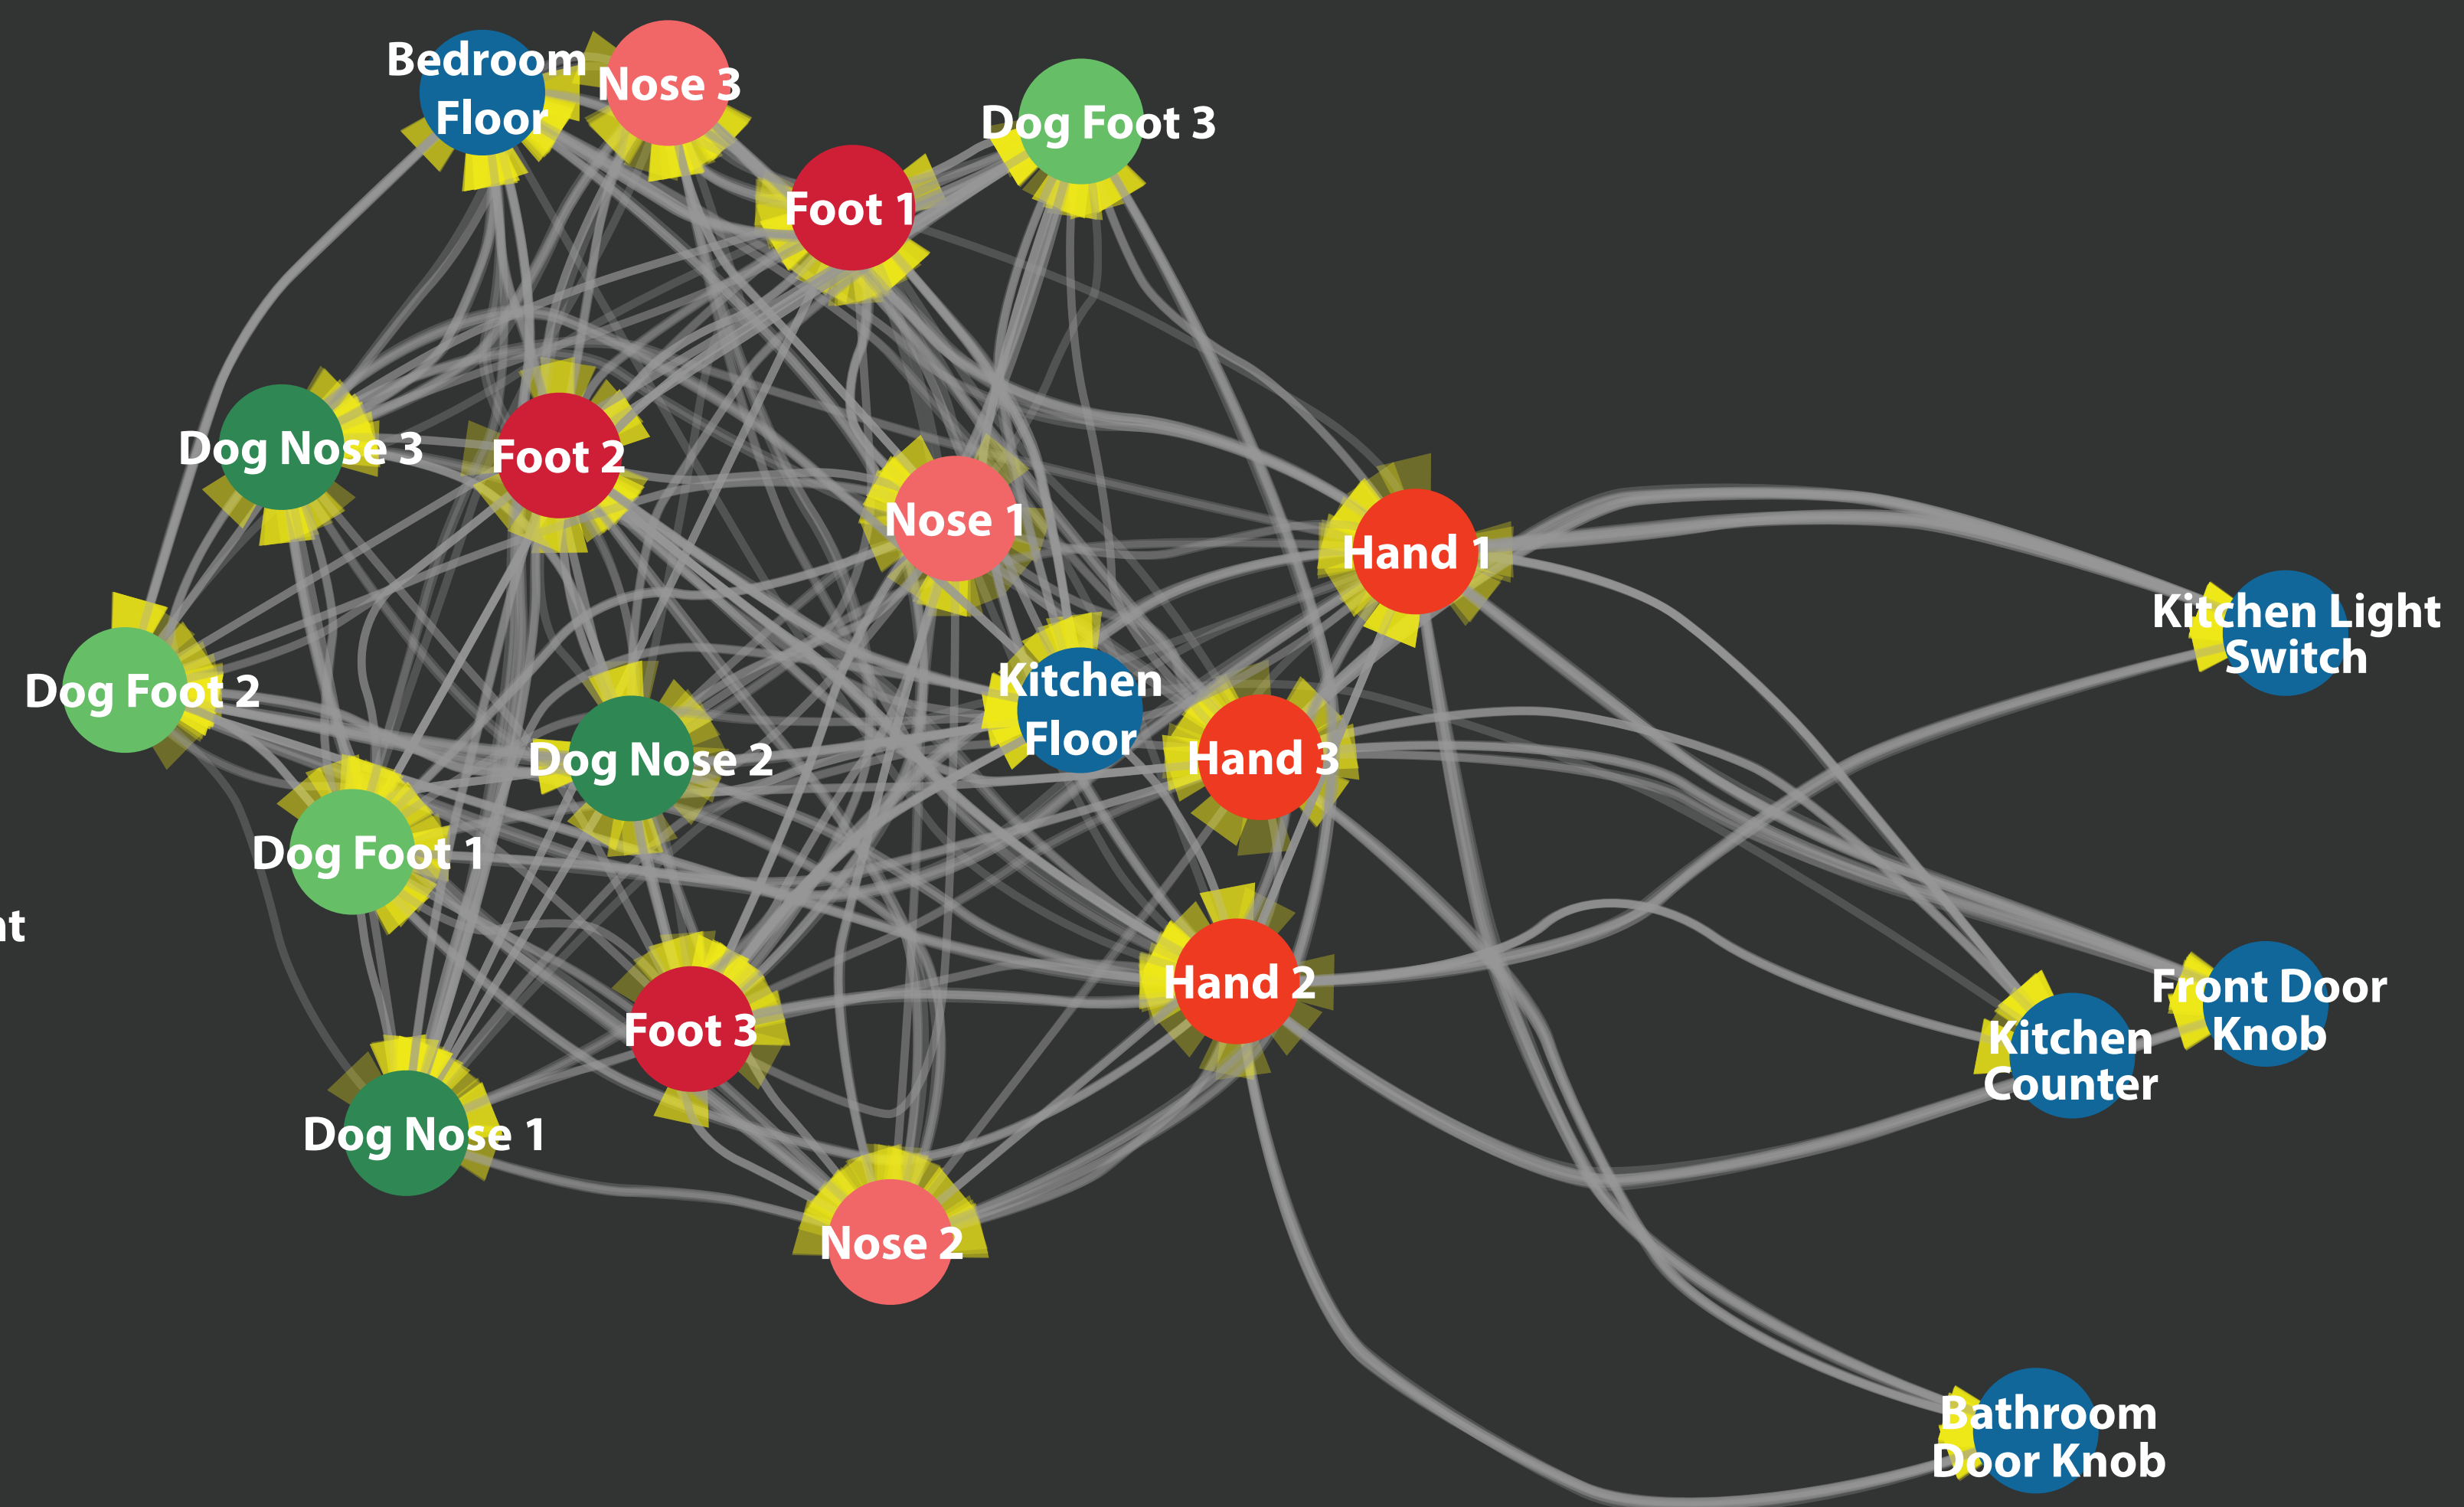

Supplement: NIHMS663075-supplement-Figure_S5.pdf [file NIHMS663075-supplement-Figure_S5.pdf]

All Human Samples  
R = 0.291

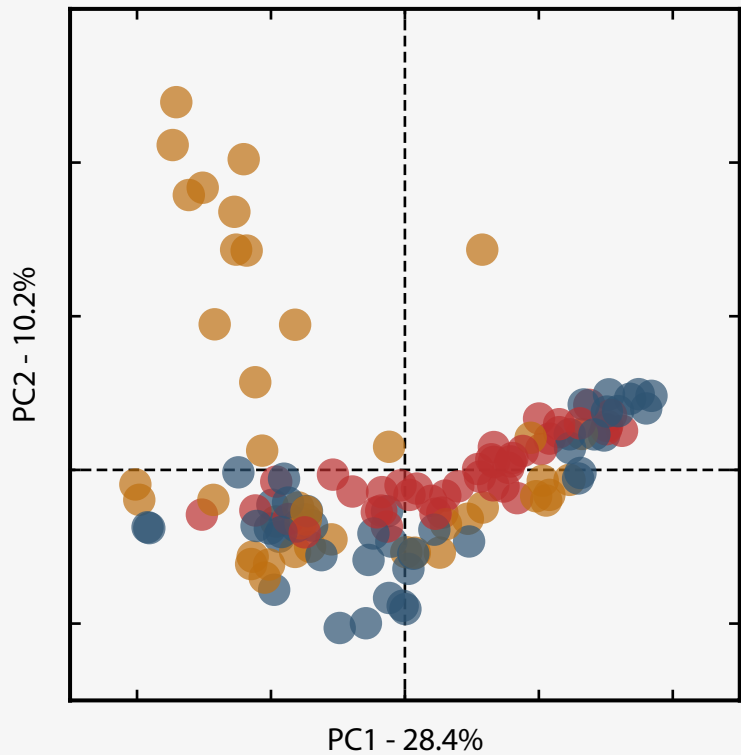

Hand  
R = 0.300

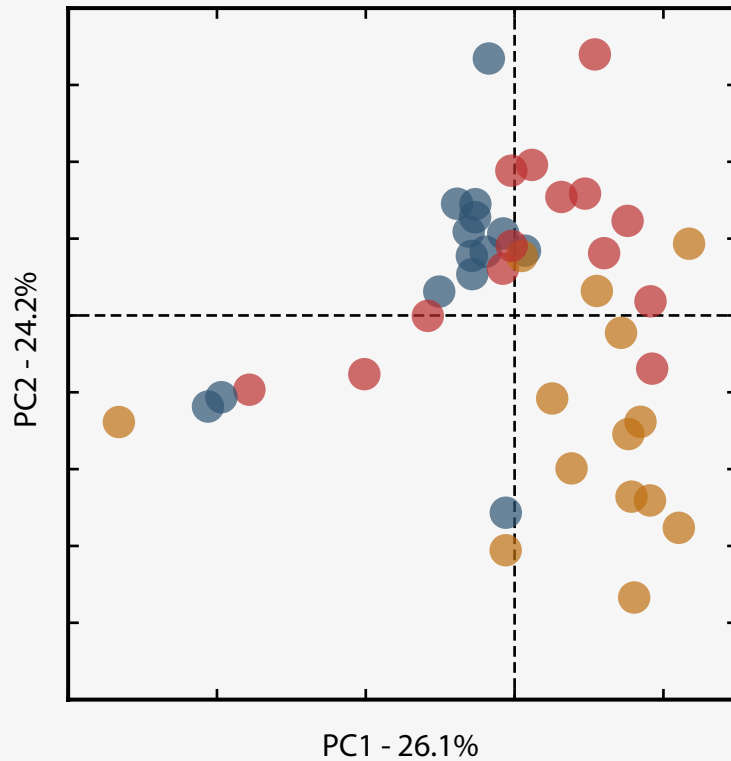

Foot  
R = 0.487

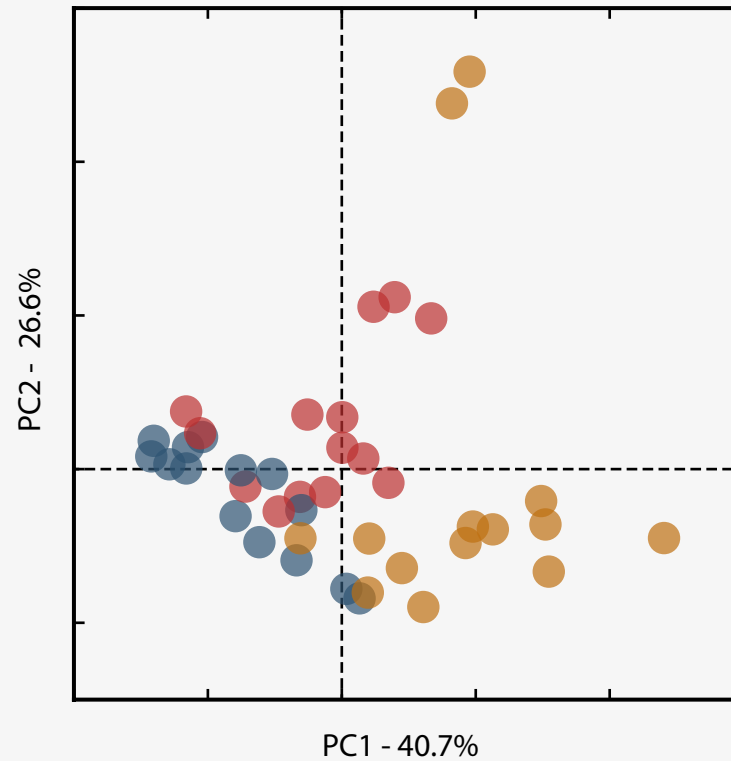

Nose  
R = 0.690

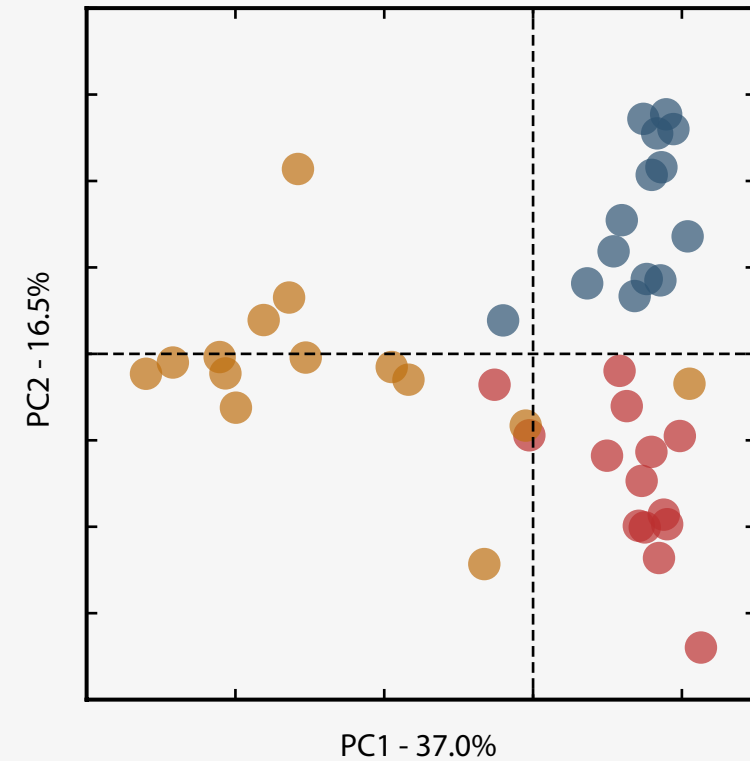

Person 1   Person 2   Person 3  
└──────────┘  
Couple

Supplement: NIHMS663075-supplement-Figure_S6.pdf [file NIHMS663075-supplement-Figure_S6.pdf]

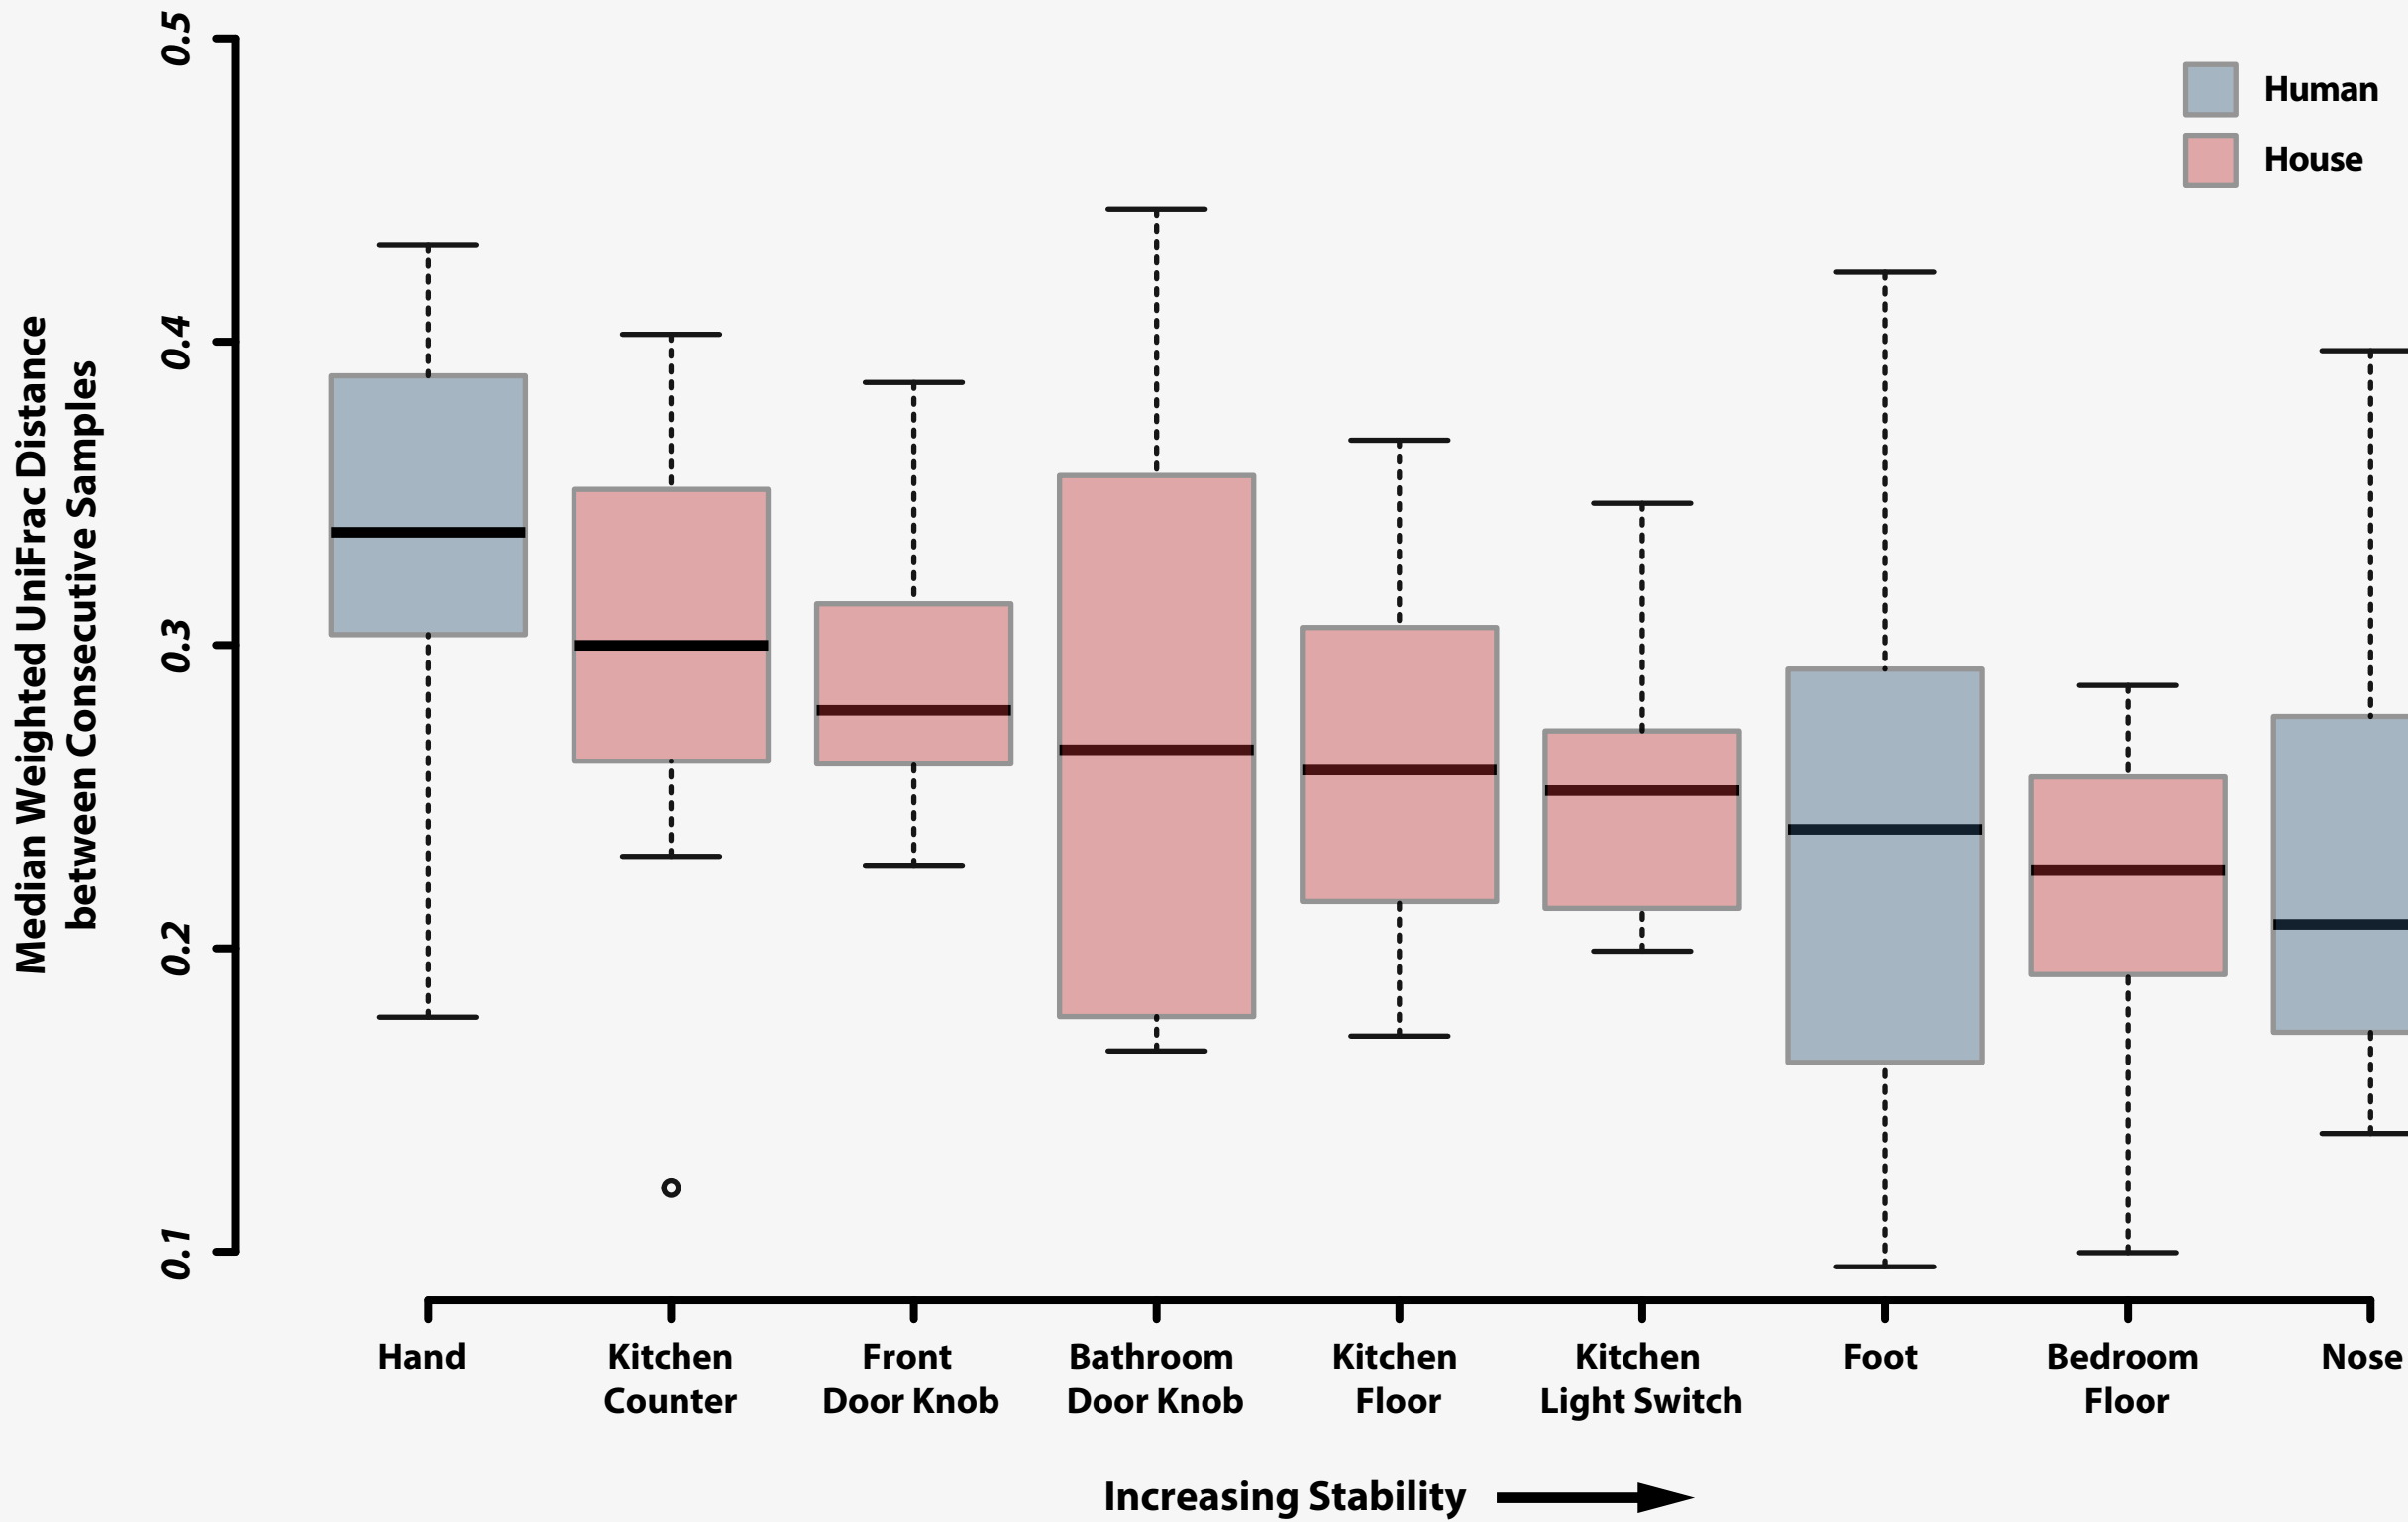

Supplement: NIHMS663075-supplement-Figure_S7.pdf [file NIHMS663075-supplement-Figure_S7.pdf]

**A**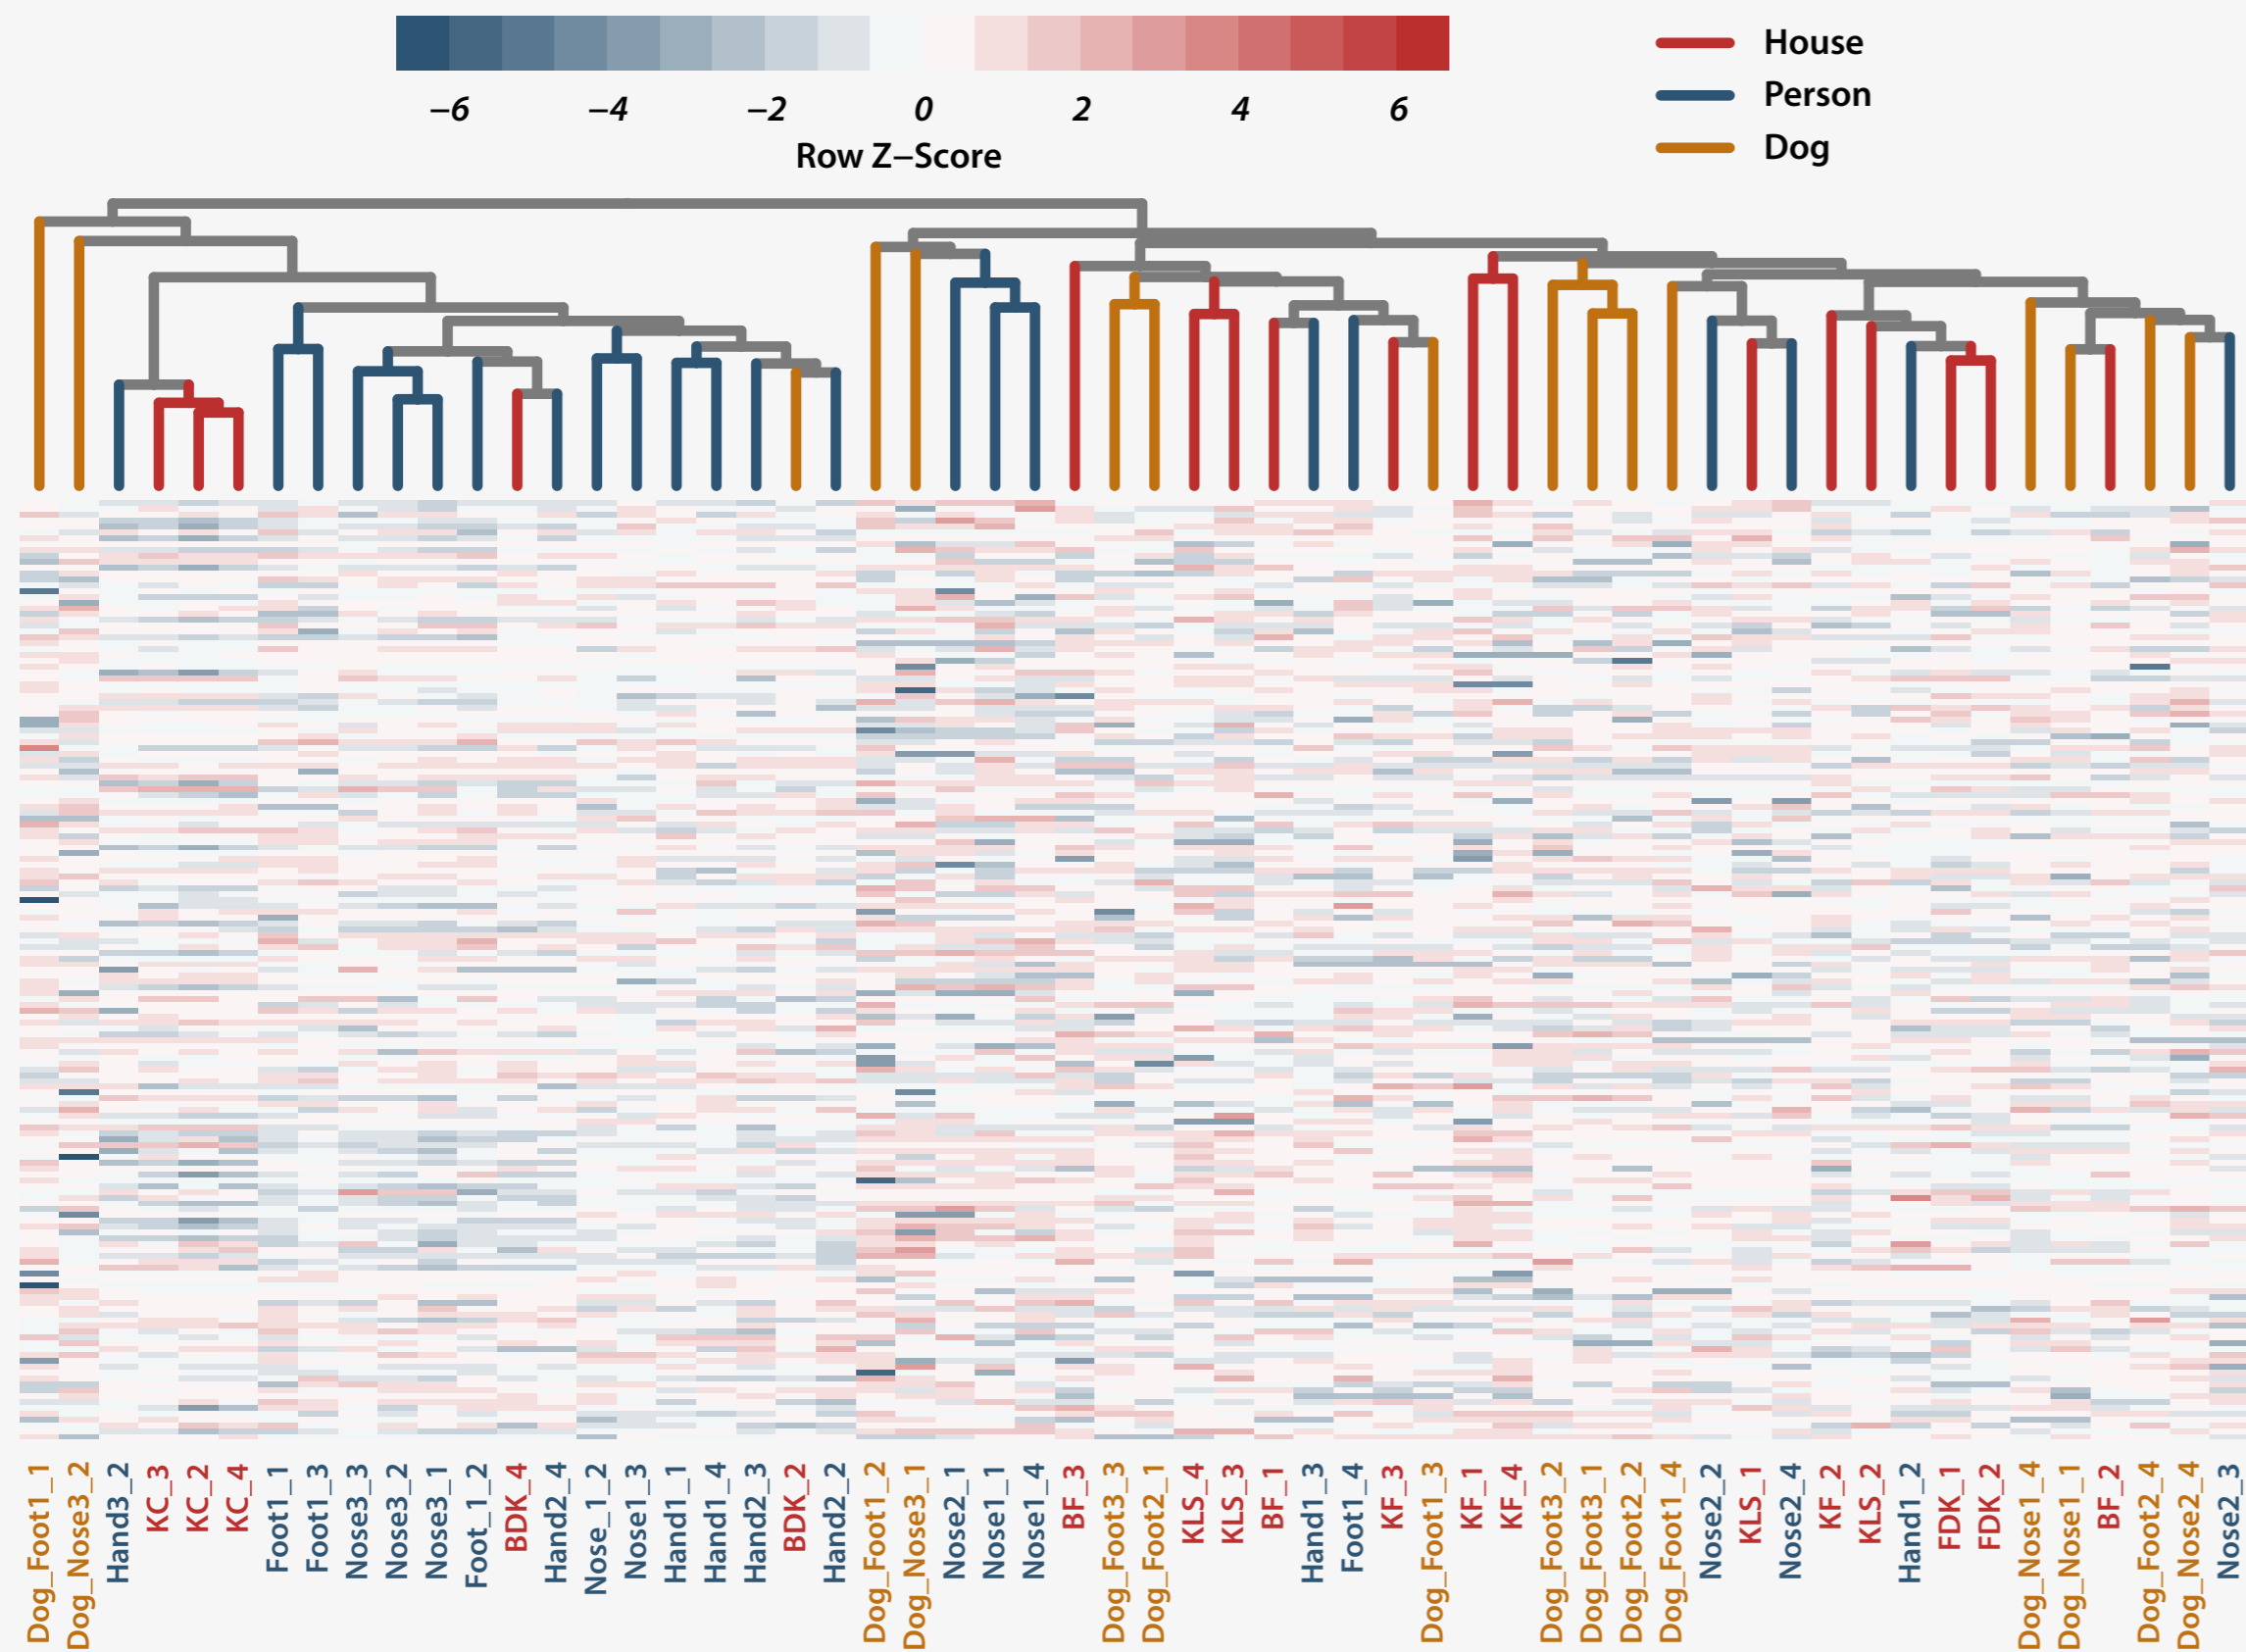**B**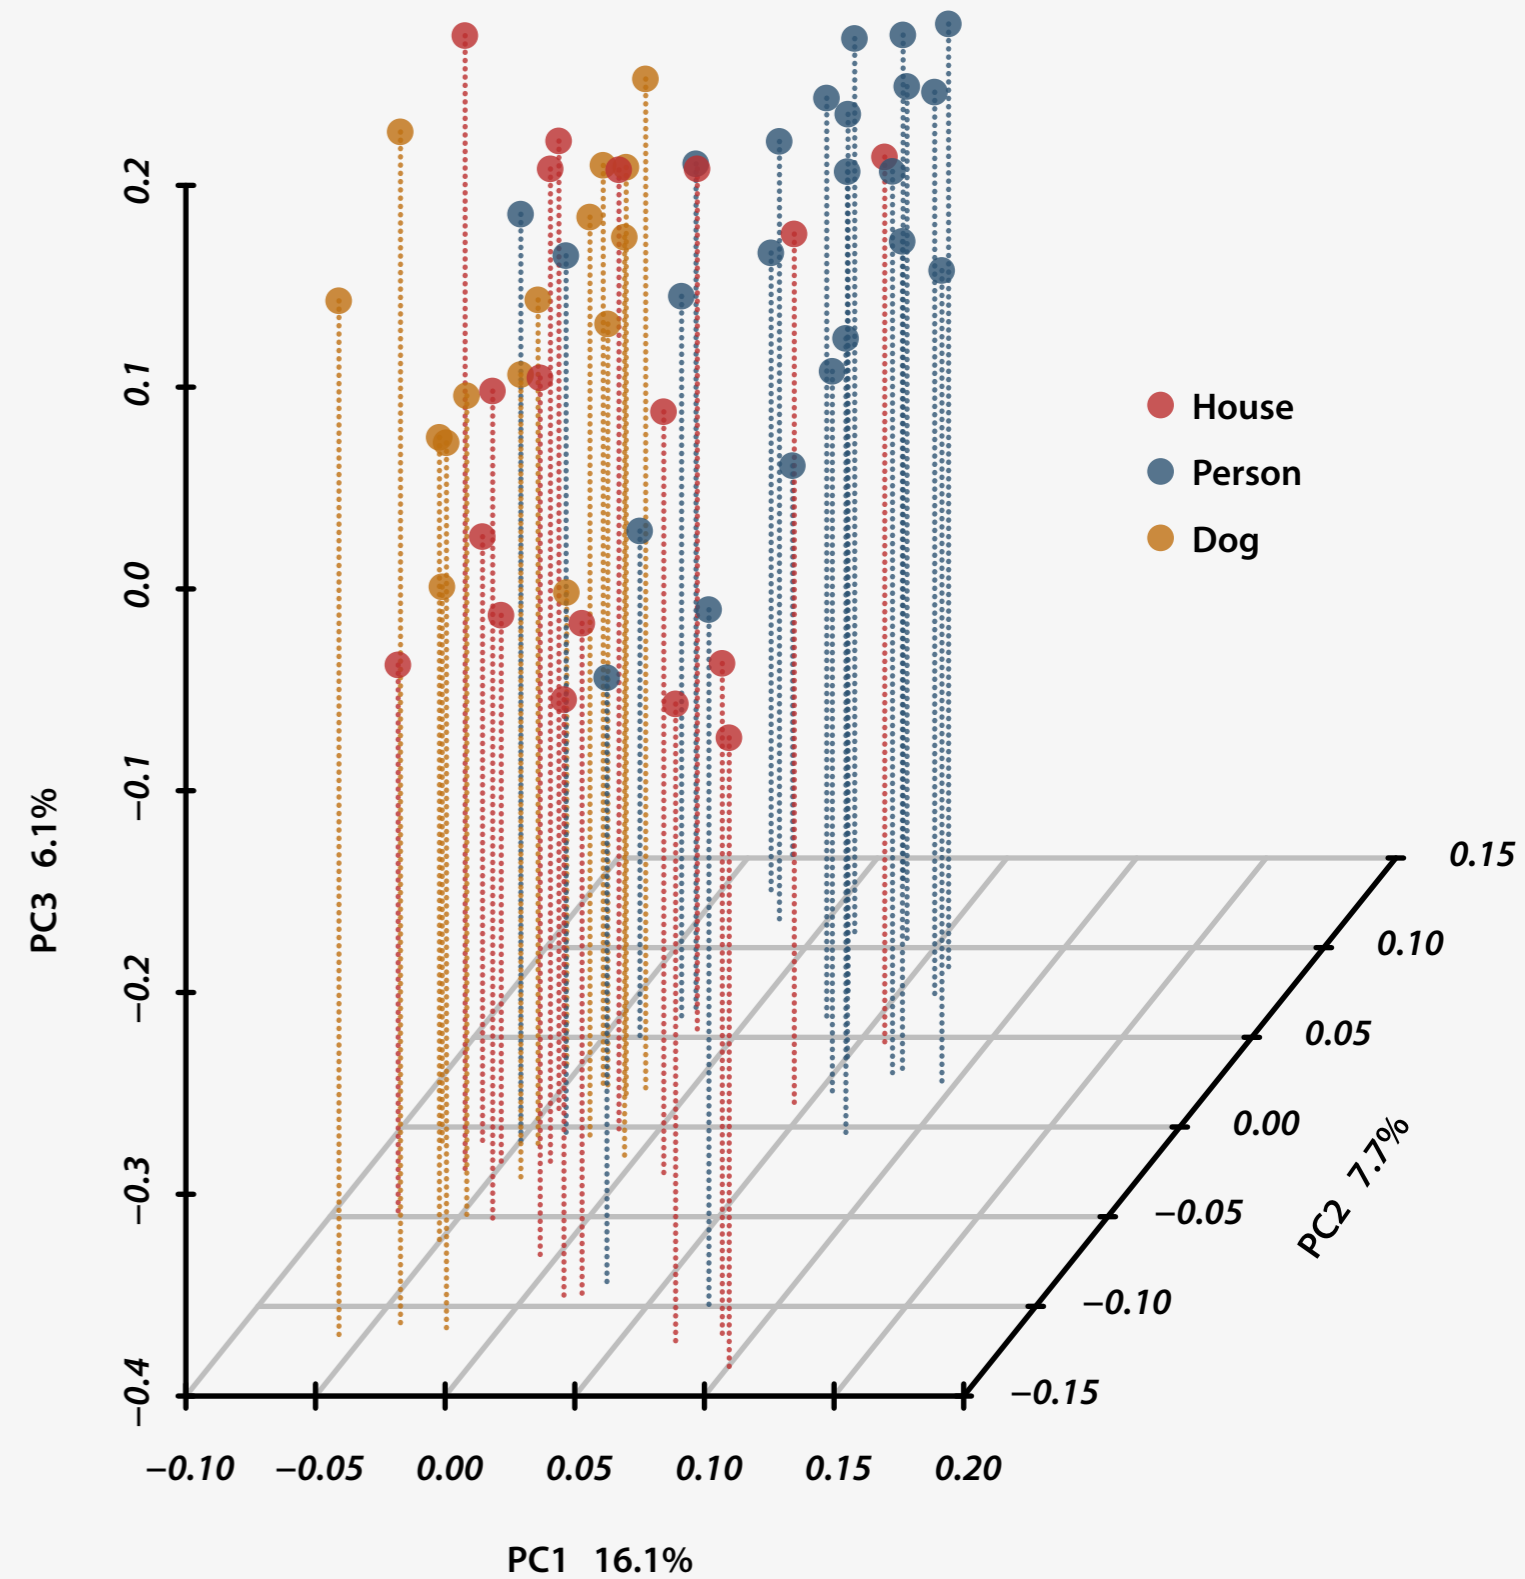

Supplement: NIHMS663075-supplement-Figure_S8.pdf [file NIHMS663075-supplement-Figure_S8.pdf]

Percent of Reads Mapped to AR Genes

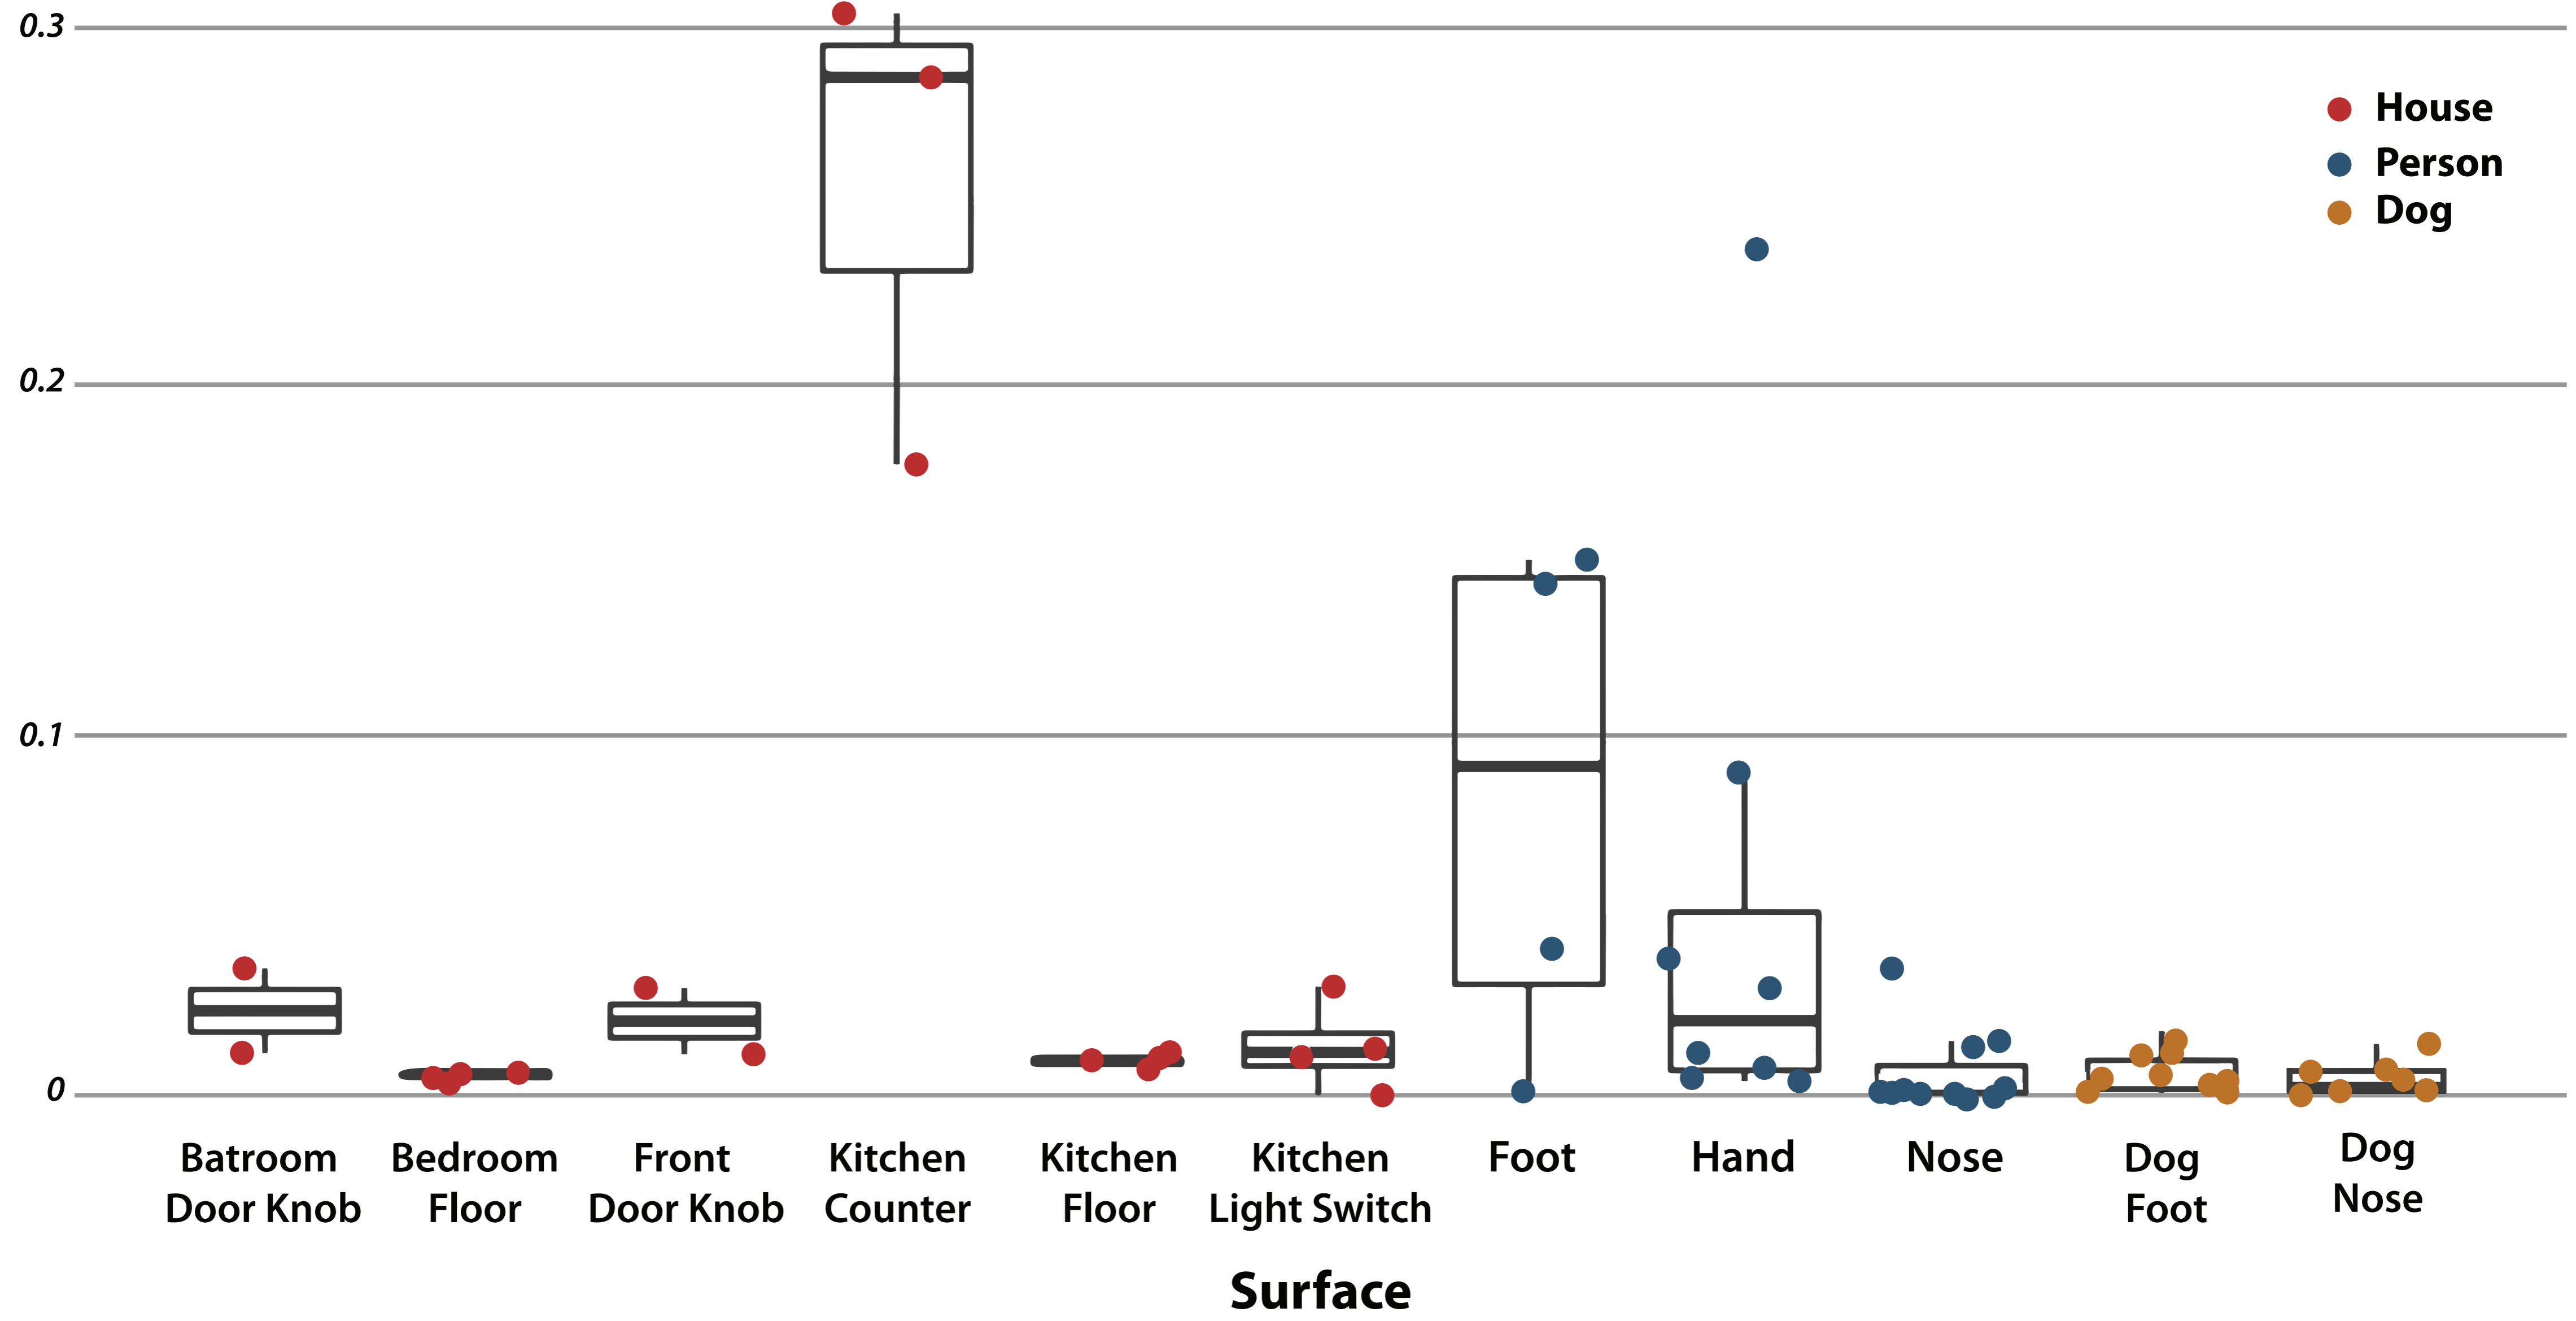

Supplement: NIHMS663075-supplement-Figure_S9.pdf [file NIHMS663075-supplement-Figure_S9.pdf]
